# Supplementary material for: Radical and Cationic Pathways in C(sp3)–H Bond Oxygenation by Dioxiranes of Bicyclic and Spirocyclic Hydrocarbons Bearing Cyclopropane Moieties
Source: PubMed Central journal article supplement (PMC10636757; doi:10.1021/jacs.3c07163), 2023-10-24
Supplement: ja3c07163_si_001.pdf [file ja3c07163_si_001.pdf]

# Supporting Information

## Radical and Cationic Pathways in C(sp<sup>3</sup>)-H Bond Oxygenation by Dioxiranes of Bicyclic and Spirocyclic Hydrocarbons Bearing Cyclopropane Moieties

Marco Galeotti,<sup>1,2§</sup> Woojin Lee,<sup>3§</sup> Sergio Sisti,<sup>1</sup> Martina Casciotti,<sup>1</sup> Michela Salamone,<sup>1</sup>  
K. N. Houk,<sup>3\*</sup> and Massimo Bietti<sup>1\*</sup>

<sup>1</sup> *Dipartimento di Scienze e Tecnologie Chimiche, Università "Tor Vergata", Via della Ricerca Scientifica, 1 I-00133 Rome, Italy.*

<sup>2</sup> *QBIS Research Group, Institut de Química Computacional i Catàlisi (IQCC) and Departament de Química, Universitat de Girona, Campus Montilivi, Girona E-17071, Catalonia, Spain.*

<sup>3</sup> *Department of Chemistry and Biochemistry, University of California, Los Angeles, California 90095, United States.*

<sup>§</sup>*M. G. and W. L. contributed equally to this work.*

# CONTENTS

|                                                                                     |             |
|-------------------------------------------------------------------------------------|-------------|
| <b>S1. EXPERIMENTAL SECTION .....</b>                                               | <b>S3</b>   |
| S1.1. Instrumentation.....                                                          | S3          |
| S1.2. Materials.....                                                                | S3          |
| <b>S2. SYNTHESIS OF THE SUBSTRATES .....</b>                                        | <b>S4</b>   |
| <b>S3. OXIDATIONS PROMOTED BY ETFDO .....</b>                                       | <b>S7</b>   |
| S3.1. General procedure .....                                                       | S7          |
| S3.2. Results .....                                                                 | S8          |
| <b>S4. ISOLATION AND CHARACTERIZATION OF THE OXIDATION PRODUCTS</b><br><b>.....</b> | <b>S13</b>  |
| <b>S5. COMPUTATIONAL SECTION .....</b>                                              | <b>S24</b>  |
| S5.1. Calculated Energetics.....                                                    | S24         |
| S5.2. Calculated Cartesian coordinates .....                                        | S26         |
| S5.3. Supplementary figures of computational results .....                          | S106        |
| <b>S6. REFERENCES.....</b>                                                          | <b>S115</b> |

## **S1. Experimental Section**

### **S1.1. Instrumentation**

Dioxirane-promoted oxidation were carried out under magnetic stirring at constant temperature ( $T = 0\text{ }^{\circ}\text{C}$ ) by means of a Julabo F34 Refrigerated Circulator connected to the outer casing of a pyrex glass vessel containing the reaction mixture.

Gas-chromatographic analyses were carried out using an Agilent 7820A gas-chromatograph equipped with a stationary phase HP-5  $30\text{ m} \times 0.320\text{ mm} \times 0.25\text{ }\mu\text{m}$  capillary column.

GC-MS analyses were performed using a Shimadzu GCMS-QP2010 SE gas chromatograph mass spectrometer equipped with a Supelco spb-5  $30\text{ m} \times 0.25\text{ mm} \times 0.25\text{ }\mu\text{m}$  capillary column.

$^1\text{H}$ -NMR and  $^{13}\text{C}$ -NMR spectra were recorded on Bruker Avance 400 and Bruker Avance 700 MHz spectrometers. Spectra were referenced to tetramethylsilane (TMS).

### **S1.2. Materials**

Reagents and solvents used are of commercially available reagent quality unless stated otherwise and are purchased from SDS, Aldrich, Scharlab and Fluorochem. Sigma-Aldrich HPLC-grade acetonitrile was employed for oxidation catalysis. All reagents used are of the highest commercial quality available unless stated otherwise.

## S2. Synthesis of the substrates

The synthesis of the substrates **S1-S5**, **S7** and **S8** was carried out according to a reported procedure (**Scheme S1**).<sup>1</sup> **S6** was a commercial sample of the highest quality available and was used as received.

Alkenes used for the synthesis of **S1-S5** and **S7** were of the highest commercial quality available and were used as received. The commercially unavailable 1-(*tert*-butyl)-4-methylenecyclohexane used for the synthesis of **S8** was prepared by Wittig olefination of the parent ketone according to a reported procedure.<sup>1</sup>

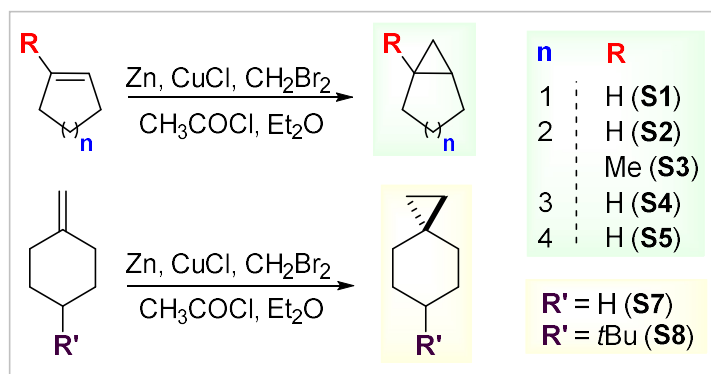

**Scheme S1.** Cyclopropanation of alkenes *via* Simmons-Smith reaction.

Zinc (4 eq), copper (I) chloride (0.4 eq), dibromomethane (1 eq) and 15 ml of diethyl ether were introduced into a 100 ml three neck round-bottom flask, equipped with a condenser system and a pressure-equalizing dropping funnel. After addition of acetyl chloride (0.08 eq), the flask is placed in a pre-heated oil bath (45-50 °C) under vigorous reflux and stirring. When the solution turned dark (about 10 minutes), ~0.04 mol of the alkene (1 eq) diluted in 5 ml of diethyl ether were added dropwise for 15 minutes. The remaining dibromomethane (2 eq) diluted in 5 ml of diethyl ether was added dropwise for 30 minutes under manageable reflux. When substrate was fully converted (generally 2 hours after the addition of all the reagents), the flask was cooled in an ice bath and 25 ml of a saturated ammonium chloride aqueous solution were added dropwise (the reaction was strongly exothermic) through the dropping funnel. The residual solid zinc was removed by vacuum filtration and the aqueous layer of the filtrate was washed twice with *n*-pentane (2 × 25 ml). The combined organic layers were washed twice with a 2.5 M sodium hydroxide aqueous solution (2 × 50 ml), one time with brine (50 ml) and were dried over anhydrous sodium sulfate. Due to product volatility (in particular for hydrocarbons **S2-S4**, **S7**), *n*-pentane and diethyl ether were carefully removed by Hempel fractional distillation and a controlled vacuum distillation (vacuum applied by water pump and controlled by means of a pressure gauge) of the remaining oil gave the pure cyclopropyl derivative (≥ 98%). For the purification of the bicyclo[3.1.0]hexane (**S1**) (boiling point ~ 80 °C) the solvent was completely removed by distillation with a Vigreux column and the fractionation of the residue yielded the pure **S1**.<sup>2</sup>

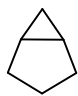

Bicyclo[3.1.0]hexane (**S1**). Prepared following the general procedure on 0.059 mol of cyclopentene. Fractional distillation of the crude afforded **S1** as a colorless liquid (1.0 g, 0.012 mol, 20% yield). Spectroscopic data are consistent with those reported in the literature.<sup>2</sup> <sup>1</sup>H NMR (400 MHz, CDCl<sub>3</sub>)  $\delta$ , ppm: 1.75 – 1.61 (m, 4H), 1.54 – 1.47 (m, 1H), 1.24 – 1.17 (m, 2H), 1.15 – 1.04 (m, 1H), 0.26 (td,  $J = 7.9, 4.7$  Hz, 1H), 0.09 (q,  $J = 4.0$  Hz, 1H).

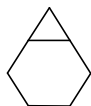

Bicyclo[4.1.0]heptane (**S2**). Prepared following the general procedure on 0.041 mol of cyclohexene. Vacuum distillation (60 °C, 160 mmHg) of the crude afforded **S2** as a colorless liquid (1.3 g, 0.014 mol, 34% yield). Spectroscopic data are consistent with those reported in the literature.<sup>3</sup> <sup>1</sup>H-NMR (400 MHz, CDCl<sub>3</sub>)  $\delta$ , ppm: 1.95 – 1.81 (m, 2H), 1.69 – 1.57 (m, 2H), 1.34 – 1.10 (m, 4H), 0.86 (dddt,  $J = 9.0, 6.7, 4.2, 1.1$  Hz, 2H), 0.54 (td,  $J = 8.9, 4.3$  Hz, 1H), 0.02 (td,  $J = 5.3, 4.4$  Hz, 1H).

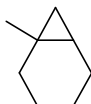

1-Methylbicyclo[4.1.0]heptane (**S3**). Prepared following the general procedure on 0.042 mol of 1-methylcyclohexene. Vacuum distillation (56 °C, 80 mmHg) of the crude afforded **S3** as a colorless liquid (2.0 g, 0.018 mol, 43% yield). Spectroscopic data are consistent with those reported in the literature.<sup>4</sup> <sup>1</sup>H NMR (400 MHz, CDCl<sub>3</sub>)  $\delta$ , ppm: 1.97 – 1.86 (m, 1H), 1.74 (dt,  $J = 13.4, 5.3$  Hz, 1H), 1.55 – 1.47 (m, 2H), 1.39 – 1.30 (m, 1H), 1.28 – 1.21 (m, 1H), 1.20 – 1.07 (m, 2H), 1.04 (s, 3H), 0.66 (m, 1H), 0.29 (dd,  $J = 9.0, 4.1$  Hz, 1H), 0.15 (t,  $J = 4.7$  Hz, 1H).

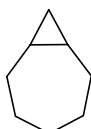

Bicyclo[5.1.0]octane (**S4**). Prepared following the general procedure on 0.021 mol of cycloheptene. Vacuum distillation (90 °C, 160 mmHg) of the crude afforded **S4** as a colorless liquid (0.95 g, 0.0086 mol, 41% yield). Spectroscopic data are consistent with those reported in the literature.<sup>5</sup> <sup>1</sup>H NMR (400 MHz, CDCl<sub>3</sub>)  $\delta$ , ppm = 2.21 – 2.06 (m, 2H), 1.71 (m, 2H), 1.36 (m, 2H), 1.15 (dtt,  $J = 13.3, 12.1, 3.1$  Hz, 1H), 0.96 – 0.85 (m, 2H), 0.84 – 0.75 (m, 2H), 0.66 (ddd,  $J = 8.5, 7.4, 4.3$  Hz, 1H), 0.06 (d,  $J = 4.7$  Hz, 1H).

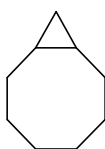

Bicyclo[6.1.0]nonane (**S5**). Prepared following the general procedure on 0.039 mol of cyclooctene. Vacuum distillation (71 °C, <1 mmHg) of the crude afforded **S5** as a colorless liquid (2.1 g, 0.017 mol, 44% yield). Spectroscopic data are consistent with those previously reported in the literature.<sup>3</sup> <sup>1</sup>H NMR (400 MHz, CDCl<sub>3</sub>)  $\delta$ , ppm = 2.03 – 1.92 (m, 2H), 1.68 (m, 2H), 1.60 – 1.49 (m, 3H), 1.46 – 1.28 (m, 4H), 0.91 (m, 2H), 0.67 – 0.48 (m, 3H), -0.29 (td,  $J = 4.9, 3.7$  Hz, 1H).

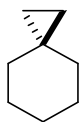

Spiro[2.5]octane (**S7**). Prepared following the general procedure on 0.042 mol of methylenecyclohexane. Vacuum distillation (73 °C, 80 mmHg) of the crude afforded **S7** as a colorless liquid (2.0 g, 0.018 mol, 43% yield). Spectroscopic data are consistent with those reported in the literature.<sup>1</sup> <sup>1</sup>H-NMR (400 MHz, CDCl<sub>3</sub>) δ, ppm: 1.5 (m, 6H), 1.25 (m, 4H), 0.19 (m, 4H).

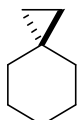

*t*Bu 6-*tert*-Butylspiro[2.5]octane (**S8**). Prepared following the general procedure on 0.030 mol of 1-(*tert*-butyl)-4-methylenecyclohexane. Vacuum distillation (80 °C, <1 mmHg) of the crude afforded **S8** as a colorless liquid (2.0 g, 0.012 mol, 40% yield). Spectroscopic data are consistent with those reported in the literature.<sup>1</sup> <sup>1</sup>H-NMR (400 MHz, CDCl<sub>3</sub>) δ, ppm: 1.80 – 1.68 (m, 4H), 1.22 – 1.08 (m, 2H), 1.07 – 0.95 (m, 1H), 0.89 (m, 11H), 0.32 – 0.23 (m, 2H), 0.23 – 0.12 (m, 2H).

### S3. Oxidation promoted by ETFDO

#### S3.1. General procedure

The oxidation of hydrocarbons bearing cyclopropyl moieties was performed employing *in situ* generated dioxiranes, according to the following procedure. This protocol was optimized in our laboratory,<sup>6</sup> building on previous work by Hilinski and coworkers.<sup>7</sup>

All the experiments were carried out under magnetic stirring at  $T = 0\text{ }^{\circ}\text{C}$ . 62 mg (0.1 mmol, 1 eq) of potassium peroxymonosulfate triple salt ( $2\text{KHSO}_5 \cdot \text{KHSO}_4 \cdot \text{K}_2\text{SO}_4$ , oxone) and 33 mg (0.4 mmol, 4 eq) of  $\text{NaHCO}_3$  were placed in a pyrex glass tube equipped with an outer containing for circular refrigeration, then 1.0 mL of bidistilled water was added. When the salts were solubilized, 1.7 mg (0.005 mmol, 5 mol%) of  $\text{Bu}_4\text{NHSO}_4$  and 3 mL of 1,1,1,3,3,3-hexafluoro-2-propanol (HFIP) were added (alternatively 3 ml of TFE or 1.5 ml of MeCN), followed by 0.1 mmol (1.0 eq) of substrate. After 5 minutes, 2.7  $\mu\text{L}$  (0.02 mmol, 0.2 eq) of 1,1,1-trifluoro-2-butanone were added to the reaction mixture. In order to maximize the product yields, additional portions (from 1 to 3) of oxone (1 eq),  $\text{NaHCO}_3$  (4 eq) and the ketone (0.2 eq) were then added to the reaction vessel after different times (usually 3 or 6 hours). The reaction was left at  $T = 0\text{ }^{\circ}\text{C}$  under magnetic stirring for the total reaction time (range from 3 to 48 hours). The mixture was then diluted with a saturated NaCl solution and, after addition of an internal standard (4-*tert*-butylcyclohexanone), extracted with 3x5 mL of  $\text{CH}_2\text{Cl}_2$ , dried over anhydrous  $\text{Na}_2\text{SO}_4$  and filtered. GC analysis of the solution afforded the conversions of the substrate and product yields relative to the internal standard integration.

### S3.2. Results

Product yields for the oxygenation of hydrocarbons **S1-S8** promoted by ETFDO were reported in **Table S1-S8**. The oxygenated products in  $\alpha$  to the cyclopropyl group (main products) were identified and quantified by comparison with authentic samples of isolated compounds. Identification of the remote oxygenated products was carried out after chromic acid oxidation of the reaction mixture by means of GC-MS analysis.<sup>6</sup> The spectrometric data of the corresponding ketones matched with those reported in literature (see below). For the oxidation of **S6** and **S7**, quantification of the product yields were obtained after chromic acid oxidation of the reaction mixture.

**Table S1.** ETFDO-mediated oxidation of bicyclo[3.1.0]hexane (**S1**).<sup>a</sup>

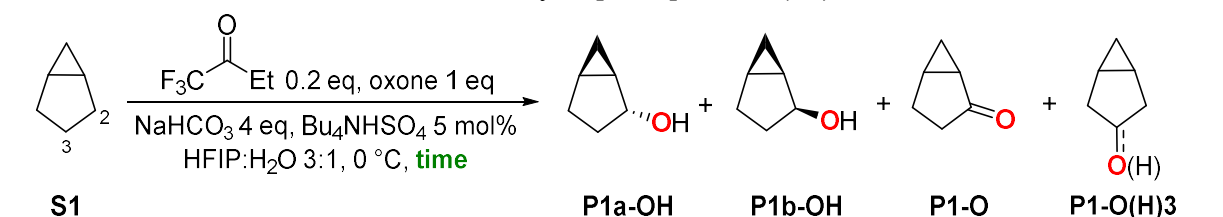

| Entry    | Time /h         | Conv. / % | Product yields (%) |           |           |            | Total yield (%) |
|----------|-----------------|-----------|--------------------|-----------|-----------|------------|-----------------|
|          |                 |           | P1a-OH             | P1b-OH    | P1-O      | P1-O(H)3   |                 |
| <b>1</b> | 6 <sup>b</sup>  | 15        | 8.4                | 5.5       | -         | 0.5        | 14.4            |
| <b>2</b> | 24 <sup>c</sup> | 59        | 27                 | 13        | 11        | 1.7        | 52.7            |
| <b>3</b> | 48 <sup>d</sup> | <b>80</b> | <b>32</b>          | <b>20</b> | <b>16</b> | <b>2.5</b> | <b>70.5</b>     |

<sup>a</sup>Conversion and product yields were determined by GC and averaged over two independent experiments.

<sup>b</sup>Addition of 1 eq oxone, 4 eq NaHCO<sub>3</sub> and 0.2 eq ketone after 3 hours. <sup>c</sup>Addition of 1 eq oxone, 4 eq NaHCO<sub>3</sub> and 0.2 eq ketone after 3, 6 and 9 hours. <sup>d</sup>Addition of 1 eq oxone, 4 eq NaHCO<sub>3</sub> and 0.2 eq ketone after 6, 9, 24, 30 and 36 hours.

**Table S2.** ETFDO-mediated oxidation of bicyclo[4.1.0]heptane (**S2**).<sup>a</sup>

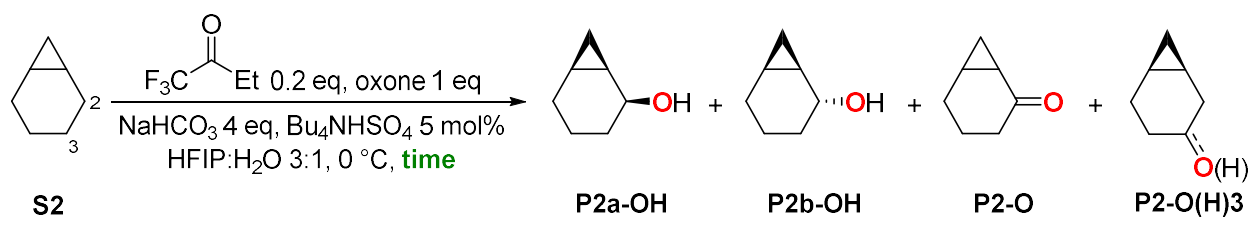

| Entry    | Time /h        | Conv. / % | Product yields (%) |            |           |            | Total yield (%) |
|----------|----------------|-----------|--------------------|------------|-----------|------------|-----------------|
|          |                |           | P2a-OH             | P2b-OH     | P2-O      | P2-O(H)3   |                 |
| <b>1</b> | 3              | 28        | 22                 | 3.1        | -         | 0.6        | 25.7            |
| <b>2</b> | 6 <sup>b</sup> | 75        | 58                 | 6.1        | 5.1       | 1.3        | 70.5            |
| <b>3</b> | 9 <sup>c</sup> | <b>87</b> | <b>61</b>          | <b>4.9</b> | <b>14</b> | <b>1.6</b> | <b>81.5</b>     |

<sup>a</sup>Conversion and product yields were determined by GC oxidation and averaged over two independent experiments. <sup>b</sup>Addition of 1 eq oxone, 4 eq NaHCO<sub>3</sub> and 0.2 eq ketone after 3 hours. <sup>c</sup>Addition of 1 eq oxone, 4 eq NaHCO<sub>3</sub> and 0.2 eq ketone after 3 and 6 hours.



**Table S3.** ETFDO-mediated oxidation of 1-methylbicyclo[4.1.0]heptane (**S3**).<sup>a</sup>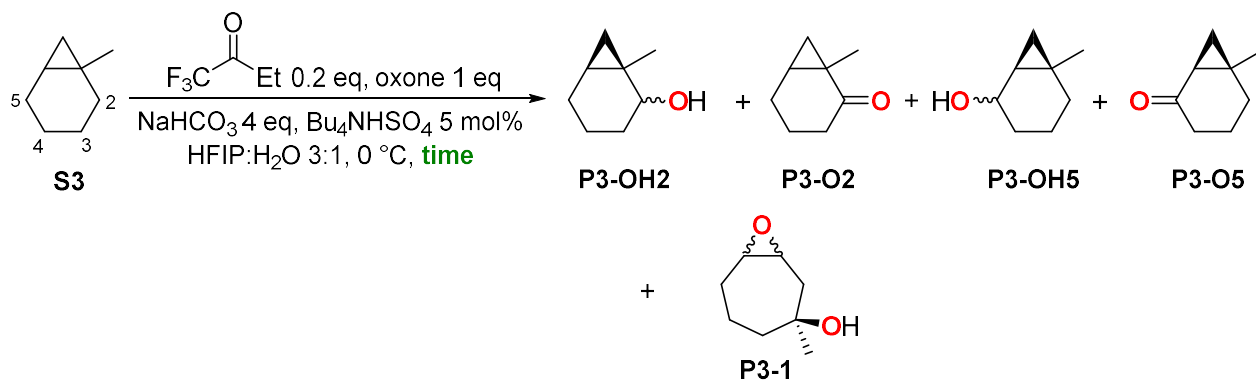

| Entry | Time / h       | Conv. / % | Product yields (%) |       |                   |       |                                              | Ratio P3-1/P3-O(H)5 | Tot. yield / % |
|-------|----------------|-----------|--------------------|-------|-------------------|-------|----------------------------------------------|---------------------|----------------|
|       |                |           | P3a-OH2 (P3b-OH2)  | P3-O2 | P3a-OH5 (P3b-OH5) | P3-O5 | P3-1 <sub>cis</sub> (P3-1 <sub>trans</sub> ) |                     |                |
| 1     | 3              | 28        | 10 (1.1)           | -     | 9.1 (1.6)         | -     | 3.5 (0.6)                                    | 0.38                | 25.9           |
| 2     | 6 <sup>b</sup> | 84        | 30 (2.4)           | 1.4   | 25 (4.0)          | 3.6   | 11 (2.0)                                     | 0.40                | 79.4           |

<sup>a</sup>Conversion and product yields were determined by GC oxidation and averaged over two independent experiments. **P3a-OH2** and **P3a-OH5** were characterized by *cis* configuration, whereas **P3b-OH2** and **P3b-OH5** by *trans* configuration. <sup>b</sup>Addition of 1 eq oxone, 4 eq  $\text{NaHCO}_3$  and 0.2 eq ketone after 3 hours. <sup>c</sup>1,1-dibromo-3,3,3-trifluoroacetone is employed as dioxirane precursor.

**Table S4.** ETFDO-mediated oxidation of bicyclo[5.1.0]octane (**S4**).<sup>a</sup>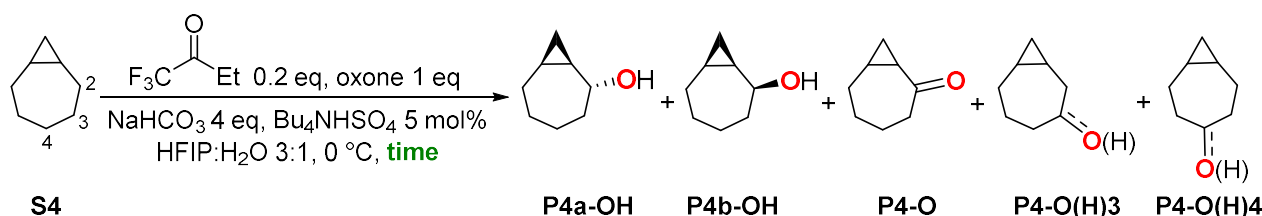

| Entry | Time / h       | Conv. / % | Product yields (%) |        |      |          |          | Total yield (%) |
|-------|----------------|-----------|--------------------|--------|------|----------|----------|-----------------|
|       |                |           | P4a-OH             | P4b-OH | P4-O | P4-O(H)3 | P4-O(H)4 |                 |
| 1     | 3              | 25        | 16                 | 1.5    | -    | 3.0      | 2.8      | 23.3            |
| 2     | 6 <sup>b</sup> | 62        | 35                 | 2.5    | 3.7  | 7.0      | 6.0      | 54.2            |
| 3     | 9 <sup>d</sup> | 84        | 48                 | 2.8    | 8.3  | 12       | 11       | 82.1            |

<sup>a</sup>Conversion and product yields were determined by GC oxidation and averaged over two independent experiments. <sup>b</sup>Addition of 1 eq oxone, 4 eq  $\text{NaHCO}_3$  and 0.2 eq ketone after 3 hours. <sup>d</sup>Addition of 1 eq oxone, 4 eq  $\text{NaHCO}_3$  and 0.2 eq ketone after 3 and 6 hours.

**Table S5.** ETFDO-mediated oxidation of bicyclo[6.1.0]nonane (**S5**).<sup>a</sup>

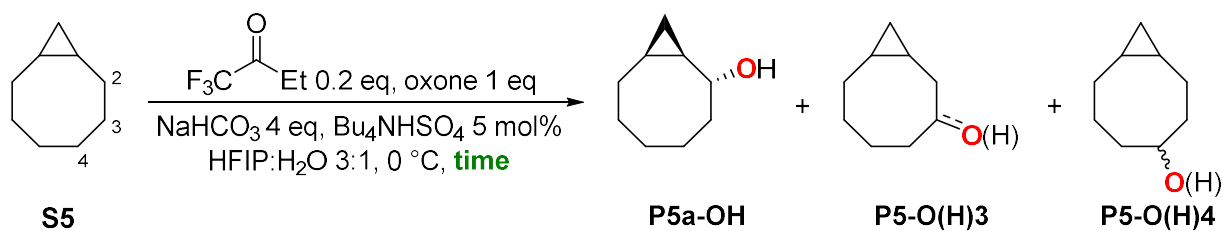

| Entry | Time / h       | Conv. / % | Product yields (%) |          |          | Total yield (%) |
|-------|----------------|-----------|--------------------|----------|----------|-----------------|
|       |                |           | P5a-OH             | P5-O(H)3 | P5-O(H)4 |                 |
| 1     | 3              | 26        | 18                 | 2.2      | 4.0      | 24.2            |
| 2     | 6 <sup>b</sup> | 67        | 49                 | 5.3      | 11       | 65.3            |
| 3     | 9 <sup>c</sup> | 86        | 57                 | 6        | 13       | 76              |

<sup>a</sup>Conversion and product yields were determined by GC and are averaged over two independent experiments. <sup>b</sup>Addition of 1 eq oxone, 4 eq NaHCO<sub>3</sub> and 0.2 eq ketone after 3 hours. <sup>c</sup>Addition of 1 eq oxone, 4 eq NaHCO<sub>3</sub> and 0.2 eq ketone after 3 and 6 hours.

**Table S6.** ETFDO-mediated oxidation of 1,1-dimethylcyclohexane (**S6**).<sup>a</sup>

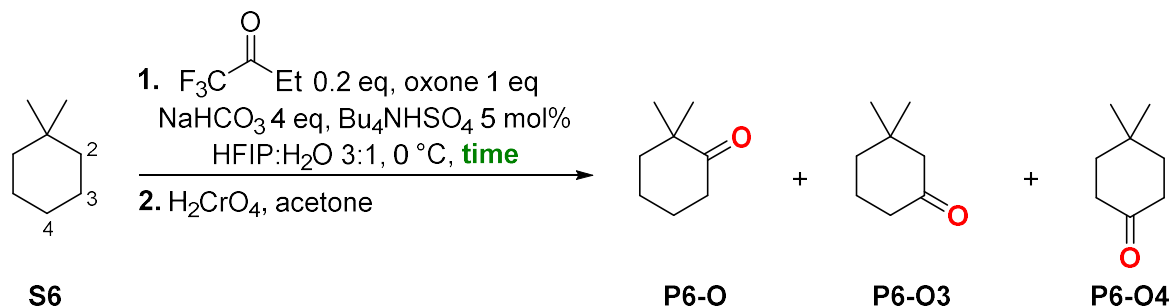

| Entry | Time / h        | Conv. / % | Product yields (%) |       |       | Total yield (%) |
|-------|-----------------|-----------|--------------------|-------|-------|-----------------|
|       |                 |           | P6-O               | P6-O3 | P6-O4 |                 |
| 1     | 3               | 13        | 3.0                | 4.7   | 2.3   | 9.7             |
| 2     | 24 <sup>b</sup> | 29        | 7.9                | 12    | 6.0   | 25.9            |
| 3     | 48 <sup>c</sup> | 49        | 14                 | 21    | 11    | 46              |

<sup>a</sup>Conversion and product yields were determined by GC and averaged over two independent experiments. <sup>b</sup>Addition of 1 eq oxone, 4 eq NaHCO<sub>3</sub> and 0.2 eq ketone after 8 hours. <sup>c</sup>Addition of 1 eq oxone, 4 eq NaHCO<sub>3</sub> and 0.2 eq ketone after 6, 16 and 22 hours.

**Table S7.** ETFDO-mediated oxidation of spiro[2.5]octane (**S7**).<sup>a</sup>

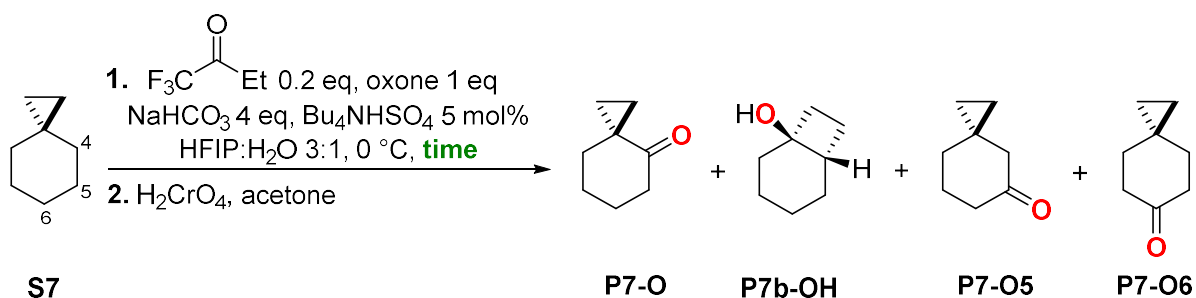

| Entry | Time / h        | Conv. / % | Product yields (%) |        |       |       | Total yield (%) |
|-------|-----------------|-----------|--------------------|--------|-------|-------|-----------------|
|       |                 |           | P7-O               | P7b-OH | P7-O5 | P7-O6 |                 |
| 1     | 3               | 31        | 18                 | 1.3    | 2.5   | 1.9   | 23.7            |
| 2     | 24 <sup>b</sup> | 66        | 42                 | 3.1    | 6     | 4.6   | 55.7            |
| 3     | 48 <sup>c</sup> | 95        | 66                 | 4.8    | 9.2   | 7.0   | 87              |

<sup>a</sup>Conversion and product yields were determined by GC after chromic acid oxidation and averaged over two independent experiments. <sup>b</sup>Addition of 1 eq oxone, 4 eq NaHCO<sub>3</sub> and 0.2 eq ketone after 8 hours. <sup>c</sup>Addition of 1 eq oxone, 4 eq NaHCO<sub>3</sub> and 0.2 eq ketone after 6, 16 and 22 hours.

**Table S8.** ETFDO-mediated oxidation of 6-*tert*-butylspiro[2.5]octane (**S8**).<sup>a</sup>

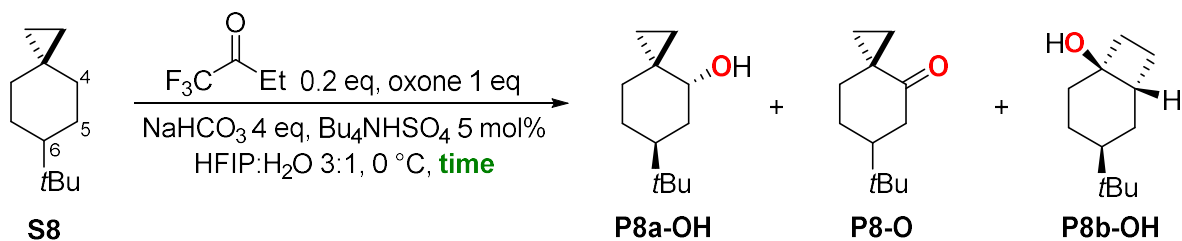

| Entry | Time (h)        | Conv (%) | Product yields (%) |      |        | Total yield (%) |
|-------|-----------------|----------|--------------------|------|--------|-----------------|
|       |                 |          | P8a-OH             | P8-O | P8b-OH |                 |
| 1     | 3               | 9.4      | 8.8                | -    | -      | 8.8             |
| 2     | 24 <sup>b</sup> | 37       | 30                 | 0.8  | 2.5    | 33              |
| 3     | 24 <sup>c</sup> | 73       | 51                 | 11   | 4      | 66              |
| 4     | 48 <sup>d</sup> | 84       | 54                 | 20   | 5.5    | 79.5            |

<sup>a</sup>Conversion and product yields were determined by GC and averaged over two independent experiments. <sup>b</sup>Addition of 1 eq oxone, 4 eq NaHCO<sub>3</sub> and 0.2 eq ketone after 8 hours. <sup>c</sup>Addition of 1 eq oxone, 4 eq NaHCO<sub>3</sub> and 0.2 eq ketone after 3, 6 and 9 hours. <sup>d</sup>Addition of 1 eq oxone, 4 eq NaHCO<sub>3</sub> and 0.2 eq ketone after 6, 16 and 22 hours.

Additional experiments on the solvent effect on the oxygenation of **S3** and **S8** promoted by ETFDO were reported in **Table S9** and **Table S10**.

**Table S9.** Solvent effect on ETFDO-mediated oxidation of 1-methylbicyclo[4.1.0]heptane (**S3**).<sup>a</sup>

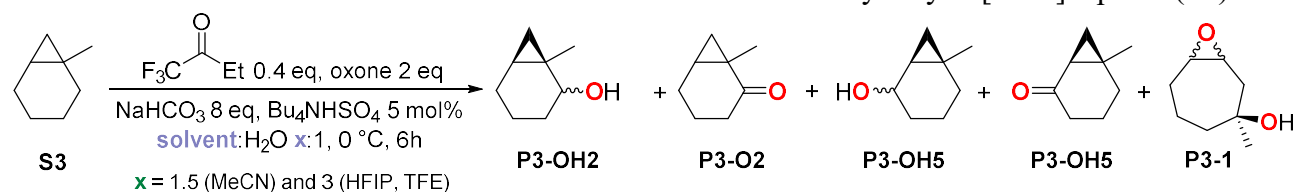

| Entry          | Solv | Conv. / % | Product yields (%) |       |                   |       |                                              | Ratio P3-1/ P3-O(H)5 | Tot. yield / % |
|----------------|------|-----------|--------------------|-------|-------------------|-------|----------------------------------------------|----------------------|----------------|
|                |      |           | P3a-OH2 (P3b-OH2)  | P3-O2 | P3a-OH5 (P3b-OH5) | P3-O5 | P3-1 <sub>cis</sub> (P3-1 <sub>trans</sub> ) |                      |                |
| 1              | HFIP | 84        | 30 (2.4)           | 1.4   | 25 (4.0)          | 3.6   | 11 (2.0)                                     | 0.40                 | 79.4           |
| 2              | TFE  | 55        | 20 (1.4)           | 1.5   | 16 (2.5)          | 4.2   | 3.1 (0.6)                                    | 0.16                 | 49.3           |
| 3              | MeCN | 20        | 6.0                | 2.8   | 3.2               | 6.6   | -                                            | <0.01                | 18.6           |
| 4 <sup>b</sup> |      | 56        | 5.7                | 16    | 1.2               | 25    | -                                            | <0.01                | 47.9           |

<sup>a</sup>Addition of 1 eq oxone, 4 eq NaHCO<sub>3</sub> and 0.2 eq ketone at t = 0 and 3 hours (same reaction conditions of entry 2, **Table S3**). Conversion and product yields were determined by GC oxidation and averaged over two independent experiments. <sup>b</sup>Addition of 1 eq oxone, 4 eq NaHCO<sub>3</sub> and 0.2 eq ketone at t = 0, 3, 6 and 9 hours (24 h overall reaction time).

**Table S10.** Solvent effect on ETFDO-mediated oxidation of 6-*tert*-butylspiro[2.5]octane (**S8**).<sup>a</sup>

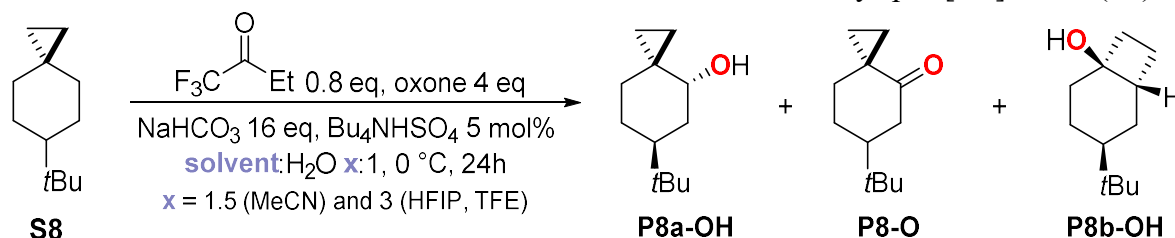

| Entry | Solv | Conv. / % | Product yields (%) |      |        | Ratio P8b-OH / P8a-OH+P8-O | Total yield (%) |
|-------|------|-----------|--------------------|------|--------|----------------------------|-----------------|
|       |      |           | P8a-OH             | P8-O | P8b-OH |                            |                 |
| 1     | HFIP | 73        | 51                 | 11   | 4      | 0.065                      | 66              |
| 2     | TFE  | 36        | 23                 | 9.1  | 0.9    | 0.028                      | 33              |
| 3     | MeCN | 11        | 4.8                | 5.2  | -      | <0.01                      | 10              |

<sup>a</sup>Addition of 1 eq oxone, 4 eq NaHCO<sub>3</sub> and 0.2 eq ketone at t = 0, 3, 6 and 9 hours (same reaction conditions of entry 3, **Table S8**). Conversion and product yields were determined by GC and averaged over two independent experiments.

## S4. Isolation and characterization of the oxidation products

The oxidation products of **S6** were identified by comparison with authentic samples of commercially available compounds. All the other reaction products were isolated by scale-up oxidation of **S1-S5**, **S7** and **S8** promoted by ETFDO.

**General procedure.** The experiments were carried out under magnetic stirring at  $T = 0\text{ }^{\circ}\text{C}$  in a jacketed 50 ml pyrex glass vessel equipped with an outer refrigerating system. 553 mg (0.9 mmol, 1 eq) of potassium peroxymonosulfate triple salt ( $2\text{KHSO}_5 \cdot \text{KHSO}_4 \cdot \text{K}_2\text{SO}_4$ , oxone), 303 mg (3.6 mmol, 4 eq) of  $\text{NaHCO}_3$  and 9 ml of bidistilled water were charged in the reaction vessel. When the salts were solubilized, 15.3 mg (0.045 mmol, 5 mol%) of  $\text{Bu}_4\text{NHSO}_4$  and 27 ml of 1,1,1,3,3,3-hexafluoro-2-propanol (HFIP) were then added, followed by the substrate (0.9 mmol, 1 eq). After 5 minutes, 24  $\mu\text{L}$  (0.18 mmol, 0.2 eq) of 1,1,1-trifluoro-2-butanone were added to the reaction mixture. Additional portions of oxone (1 eq),  $\text{NaHCO}_3$  (4 eq) and the ketone (0.2 eq) were then added to the reaction vessel after different times (usually 3 or 6 hours). The reaction was left at  $T = 0\text{ }^{\circ}\text{C}$  under magnetic stirring for the total reaction time (between 6 and 48 hours). The mixture was then diluted with a saturated  $\text{NaCl}$  solution, extracted with  $3 \times 45\text{ mL}$  portions of  $\text{CH}_2\text{Cl}_2$ , dried over anhydrous  $\text{Na}_2\text{SO}_4$  and filtered. The solvent was removed at reduced pressure and the resulting residue was purified by flash chromatography on silica gel. The characterization of the purified products was performed by  $^1\text{H-NMR}$ ,  $^{13}\text{C-NMR}$  and HRMS or GC/MS.

In the case of the isolation of 1-methylbicyclo[4.1.0]heptane (**S3**) ketone products (**P3-O2** and **P3-O5**), the scale-up ETFDO-mediated oxidation reaction was carried out in  $\text{MeCN}/\text{H}_2\text{O}$  13.5:9 ml (1.5:1).

*Cis*-bicyclo[3.1.0]hexan-2-ol (**P1b-OH**), *trans*-bicyclo[4.1.0]heptan-2-ol (**P2b-OH**), *cis*- and *trans*-1-methylbicyclo[4.1.0]heptan-2-ol (**P3a-OH2** and **P3b-OH2**), *cis*- and *trans*-6-methylbicyclo[4.1.0]heptan-2-ol (**P3a-OH5** and **P3b-OH5**), *cis*- and *trans*-bicyclo[5.1.0]octan-2-ol (**P4a-OH** and **P4b-OH**) and *cis*-6-*tert*-butylspiro[2.5]octan-4-ol (**P8c-OH**) were isolated after reduction of the parent ketones with  $\text{NaBH}_4$  according to a reported procedure.<sup>8</sup> The identification of bicyclo[3.1.0]hexan-3-one (**P1-O3**), bicyclo[4.1.0]heptan-3-one (**P2-O3**), 1-methylbicyclo[4.1.0]heptan-2-one (**P3-O2**), 6-methylbicyclo[4.1.0]heptan-2-one (**P3-O5**), bicyclo[5.1.0]octan-3-one (**P4-O3**), bicyclo[5.1.0]octan-4-one (**P4-O4**), bicyclo[6.1.0]nonan-3-one (**P5-O3**), bicyclo[6.1.0]nonan-4-one (**P5-O4**) was performed by means of GC-MS analysis by comparison with reported spectrometric data.

NMR spectra of **P3-1<sub>cis</sub>** are reported in **Figure S1-S6**.

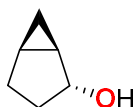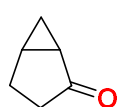

*Trans*-bicyclo[3.1.0]hexan-2-ol (**P1a-OH**) and bicyclo[3.1.0]hexan-2-one (**P1-O**). Prepared following the general procedure of scale-up ETFDO-mediated oxidation on 0.9 mmol bicyclo[4.1.0]heptane (**S1**) in 48 hours (five additions after 6, 9, 24, 30 and 36 hours). The purification by flash chromatography over silica gel (eluent pentane/ $\text{Et}_2\text{O}$  3:1) gave 10 mg (0.10 mmol, 11% yield) and 16 mg (0.17 mmol, 19% yield) of colorless liquids identified as *trans*-bicyclo[3.1.0]hexan-2-ol (**P1a-OH**) and bicyclo[3.1.0]hexan-2-one (**P1-O**), respectively. The poor yield values is due to the high volatility of the oxygenated products. Spectroscopic data are consistent with those reported in the literature.<sup>9</sup> **P1a-OH**:  $^1\text{H-NMR}$  (400 MHz,  $\text{CDCl}_3$ )  $\delta$ , ppm: 4.22

(d,  $J = 4.8$  Hz, 1H), 1.92 (ddt,  $J = 16.6, 8.3, 4.2$  Hz, 1H), 1.67 (dd,  $J = 12.5, 8.0$  Hz, 1H), 1.58 – 1.49 (m, 2H), 1.47 – 1.30 (m, 3H), 0.43 (td,  $J = 8.1, 5.3$  Hz, 1H), 0.09 – -0.02 (m, 1H). **P1-O**:  $^1\text{H-NMR}$  (400 MHz,  $\text{CDCl}_3$ )  $\delta$ , ppm:  $\delta$  2.20 – 1.97 (m, 5H), 1.81 – 1.69 (m, 1H), 1.27 – 1.15 (m, 1H), 0.93 (td,  $J = 4.6, 3.1$  Hz, 1H). GC/MS  $m/z$  (relative abundance): 96 ( $\text{M}^+$ , 55), 81, 68 (100), 55, 39. 20 mg of an inseparable mixture of **P1a-OH** and **P1b-OH** were also collected in GC ratio 1:1.

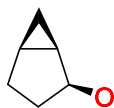

*Cis*-bicyclo[3.1.0]heptan-2-ol (**P1b-OH**). The crude obtained by the reduction with  $\text{NaBH}_4$  of 0.15 mmol of bicyclo[3.1.0]hexan-2-one (**P1-O**) was characterized by a diastereomeric ratio **P1b-OH**:**P1a-OH** equal to 5.7:1. The purification by flash chromatography over silica gel (eluent pentane: $\text{Et}_2\text{O}$  3:1) gave 4.3 mg (0.044 mmol, 29% yield) of a colorless liquid, identified as *cis*-bicyclo[3.1.0]hexan-2-ol (**P1b-OH**). The poor yield value was due to the high volatility of the oxygenated product. Spectroscopic data are consistent with those reported in the literature.<sup>10</sup> **P1b-OH**:  $^1\text{H-NMR}$  (400 MHz,  $\text{CDCl}_3$ )  $\delta$ , ppm: 4.60 – 4.50 (m, 1H), 1.79 – 1.72 (m, 2H), 1.52 – 1.44 (m, 2H), 1.37 – 1.26 (m, 2H), 1.14 – 1.01 (m, 1H), 0.57 (dt,  $J = 5.0, 3.8$  Hz, 1H), 0.37 (td,  $J = 7.8, 5.1$  Hz, 1H).

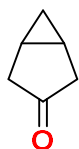

Bicyclo[3.1.0]hexan-3-one (**P1-O3**). Spectrometric data are consistent with those reported in the literature.<sup>11</sup> GC/MS  $m/z$  (relative abundance): 96 ( $\text{M}^+$ , 40), 68 (100), 67, 53, 41.

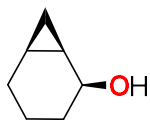

*Cis*-bicyclo[4.1.0]heptan-2-ol (**P2a-OH**). Prepared following the general procedure of scale-up ETFDO-mediated oxidation on 0.9 mmol of bicyclo[4.1.0]heptane (**S2**) in 9 hours (two additions after 3 and 6 hours). The purification by flash chromatography over silica gel (eluent hexane: $\text{EtOAc}$  3:1) gave 21.0 mg (0.19 mmol, 21% yield) of a colorless liquid identified as *cis*-bicyclo[4.1.0]heptan-2-ol (**P2a-OH**). The poor yield values were due to the high volatility of the oxygenated products. Spectroscopic data are consistent with those reported in the literature.<sup>12</sup>  $^1\text{H-NMR}$  (400 MHz,  $\text{CDCl}_3$ )  $\delta$ , ppm: 4.21 (dt,  $J = 8.9, 5.8$  Hz, 1H), 1.92 – 1.80 (m, 1H), 1.68 – 1.60 (m, 1H), 1.42 (m,  $J = 14.0, 8.5, 4.3, 2.6$  Hz, 3H), 1.31 – 1.24 (m, 1H), 1.23 – 1.13 (m, 2H), 0.99 (m,  $J = 12.9, 11.4, 8.8, 2.3$  Hz, 1H), 0.59 (td,  $J = 8.8, 4.7$  Hz, 1H), 0.32 (q,  $J = 5.2$  Hz, 1H). 19.4 mg of an inseparable mixture of **P2a-OH**, **P2b-OH** and **P2-O** were also collected in GC ratio 9:1:4.2, respectively.

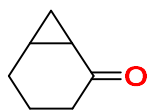

Bicyclo[4.1.0]heptan-2-one (**P2-O**). The crude obtained by the ETFDO-mediated oxidation of 0.9 mmol of bicyclo[4.1.0]heptane (**S2**) in 9 hours (two additions after 3 and 6 hours) was oxidized by chromic acid. The purification by flash chromatography over silica gel (eluent hexane: $\text{EtOAc}$  3:1) gave 44 mg (0.41 mmol, 46% yield) of a colorless liquid identified as

bicyclo[4.1.0]heptan-2-one (**P2-O**). The poor yield value was due to the low volatility of this oxygenated product. Spectroscopic data are consistent with those reported in the literature.<sup>13</sup> <sup>1</sup>H-NMR (400 MHz, CDCl<sub>3</sub>) δ, ppm: 2.36 – 2.27 (m, 1H), 2.15 – 2.04 (m, 1H), 2.01 – 1.87 (m, 2H), 1.80 – 1.72 (m, 2H), 1.71 – 1.61 (m, 2H), 1.24 (q, *J* = 5.3 Hz, 1H), 1.11 (m, *J* = 9.7, 8.2, 5.3 Hz, 1H).

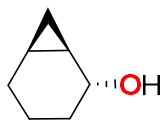

*Trans*-bicyclo[4.1.0]heptan-2-ol (**P2b-OH**). The crude obtained by the reduction with NaBH<sub>4</sub> of 0.8 mmol of bicyclo[4.1.0]heptan-2-one (**P2-O**) was characterized by a diastereomeric ratio **P2b-OH**:**P2a-OH** equal to 2:1. The purification by flash chromatography over silica gel (eluent hexane:EtOAc 3:1) gave 41 mg (0.37 mmol, 46% yield) and 13.5 mg (0.12 mmol, 15% yield) of colorless liquids, identified as *trans*-bicyclo[4.1.0]heptan-2-ol (**P2b-OH**) and *cis*-bicyclo[4.1.0]heptan-2-ol (**P2a-OH**), respectively. Spectroscopic data are consistent with those reported in the literature.<sup>14</sup> **P2b-OH**: <sup>1</sup>H-NMR (400 MHz, CDCl<sub>3</sub>) δ, ppm: 4.05 (dt, *J* = 4.3, 2.8 Hz, 1H), 1.94 – 1.82 (m, 1H), 1.76 (d, *J* = 5.6 Hz, 1H), 1.66 – 1.41 (m, 3H), 1.35 – 1.24 (m, 1H), 1.13 – 0.99 (m, 2H), 0.99 – 0.85 (m, 1H), 0.63 (td, *J* = 9.2, 4.8 Hz, 1H), 0.01 (m, 1H).

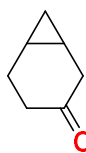

Bicyclo[4.1.0]heptan-3-one (**P2-O3**). Spectrometric data are consistent with those reported in the literature.<sup>15</sup> GC/MS *m/z* (relative abundance): 110 (*M*<sup>+</sup>, 40), 95, 82 (100), 67, 54, 39.

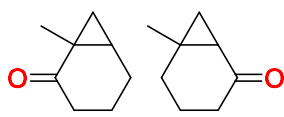

1-methylbicyclo[4.1.0]heptan-2-one (**P3-O2**) and 6-methylbicyclo[4.1.0]heptan-2-one (**P3-O5**). Prepared following the general procedure of scale-up ETFDO-mediated oxidation on 0.9 mmol of 1-methylbicyclo[4.1.0]heptane (**S3**) in MeCN/H<sub>2</sub>O 1.5:1 for 48 hours (three additions after 6, 16 and 22 hours). The purification by flash chromatography over silica gel (eluent pentane:Et<sub>2</sub>O 4:1) gave 31 mg (0.25 mmol, 28% yield) and 39.3 mg (0.32 mmol, 36% yield) of a colorless liquids identified as 1-methylbicyclo[4.1.0]heptan-2-one (**P3-O2**) and 6-methylbicyclo[4.1.0]heptan-2-one (**P3-O5**), respectively. Spectrometric data are consistent with those reported in literature.<sup>16,17</sup> **P3-O2**: GC/MS *m/z* (relative abundance): 124 (*M*<sup>+</sup>, 15), 96, 81, 68, 67 (100), 55, 41. **P3-O5**: GC/MS *m/z* (relative abundance): 124 (*M*<sup>+</sup>, 30), 96, 81, 68 (100), 67 (100), 56, 39.

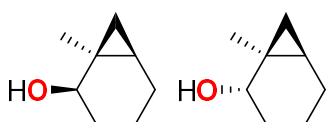

*Cis*- and *trans*-1-methylbicyclo[4.1.0]heptan-2-ol (**P3a-OH2** and **P3b-OH2**). The crude obtained by the reduction with NaBH<sub>4</sub> of 0.37 mmol of 1-methylbicyclo[4.1.0]heptan-2-one (**P3-O2**) was characterized by a diastereomeric ratio **P3a-OH2**/**P3b-OH2** equal to 2.1:1. The purification by flash chromatography over silica gel (eluent hexane:EtOAc 3:1) gave 19 mg (0.15 mmol, 41% yield) and 9.2 mg (0.073 mmol, 20% yield) of

colorless liquids, identified as *cis*-1-methylbicyclo[4.1.0]heptan-2-ol (**P3a-OH2**) and *trans*-1-methylbicyclo[4.1.0]heptan-2-ol (**P3b-OH2**), respectively. Spectroscopic data are consistent with those reported in the literature.<sup>18</sup> **P3a-OH2**: <sup>1</sup>H-NMR (400 MHz, CDCl<sub>3</sub>) δ, ppm: 3.85 (dd, *J* = 9.5, 5.7 Hz, 1H), 1.94 – 1.81 (m, 1H), 1.68 (m, *J* = 12.7, 5.7, 3.9, 1.7 Hz, 1H), 1.36 (m, *J* = 21.8, 15.7, 5.6, 2.3 Hz, 3H), 1.16 (m, 4H), 0.98 – 0.82 (m, 2H), 0.41 – 0.30 (m, 2H). **P3b-OH2**: <sup>1</sup>H-NMR (400 MHz, CDCl<sub>3</sub>) δ, ppm: 4.06 (t, *J* = 3.4 Hz, 1H), 2.08 – 1.92 (m, 1H), 1.63 – 1.37 (m, 5H), 1.20 (dq, *J* = 7.9, 3.4 Hz, 1H), 1.12 (s, 3H), 0.91 – 0.81 (m, 1H), 0.39 (dd, *J* = 8.9, 4.5 Hz, 1H), 0.16 (t, *J* = 4.9 Hz, 1H).

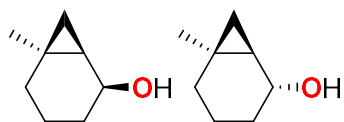

*Cis*- and *trans*-6-methylbicyclo[4.1.0]heptan-2-ol (**P3a-OH5** and **P3b-OH5**). The crude obtained by the reduction with NaBH<sub>4</sub> of 0.48 mmol of 6-methylbicyclo[4.1.0]heptan-2-one (**P3-O5**) was characterized by a diastereomeric ratio **P3a-OH5/P3b-OH5** equal to 1:3.2. The purification by flash chromatography over silica gel (eluent hexane:EtOAc 3:1) gave 8.9 mg (0.071 mmol, 15% yield) and 26 mg (0.21 mmol, 44% yield) of colorless liquids, identified as *cis*-6-methylbicyclo[4.1.0]heptan-2-ol (**P3a-OH5**) and *trans*-6-methylbicyclo[4.1.0]heptan-2-ol (**P3b-OH5**), respectively. Spectroscopic data are consistent with those reported in the literature.<sup>18,19</sup> **P3a-OH5**: <sup>1</sup>H-NMR (400 MHz, CDCl<sub>3</sub>) δ, ppm: 4.22 (q, *J* = 6.3 Hz, 1H), 1.63 – 1.49 (m, 3H), 1.41 – 1.30 (m, 2H), 1.27 – 1.21 (m, 1H), 1.09 (m, 5H), 0.50 (t, *J* = 4.9 Hz, 1H), 0.31 (dd, *J* = 9.0, 4.5 Hz, 1H). **P3b-OH5**: <sup>1</sup>H-NMR (400 MHz, CDCl<sub>3</sub>) δ, ppm: 3.94 (m, *J* = 7.3, 4.8, 1.2 Hz, 1H), 1.87 (s, 1H), 1.70 (dt, *J* = 12.7, 5.6 Hz, 1H), 1.63 – 1.45 (m, 3H), 1.20 (m, *J* = 12.1, 9.2, 6.9, 2.4 Hz, 1H), 1.08 (s, 4H), 0.75 (m, *J* = 9.7, 5.4, 1.2 Hz, 1H), 0.37 (m, *J* = 9.6, 4.7, 0.8 Hz, 1H), 0.14 (t, *J* = 5.0 Hz, 1H).

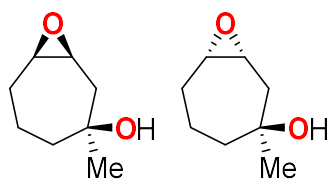

*Cis*- and *trans*-3-methyl-8-oxabicyclo[5.1.0]octan-3-ol (**P3-1<sub>cis</sub>** and **P3-1<sub>trans</sub>**). Prepared following the general procedure of scale-up ETFDO-mediated oxidation on 0.9 mmol of 1-methylbicyclo[4.1.0]heptane (**S3**) in 6 hours (one addition after 3 hours). The purification by flash chromatography over silica gel (eluent hexane/EtOAc 3:1) gave 14 mg (11% yield) of a colorless liquid identified as *cis*-3-methyl-8-oxabicyclo[5.1.0]octan-3-ol (**P3-1<sub>cis</sub>**). The identification of *trans*-3-methyl-8-oxabicyclo[5.1.0]octan-3-ol (**P3-1<sub>trans</sub>**) was performed by means of GC-MS analysis of the reaction mixture, because of the low amount formed during in the oxidation of **S3**. **P3-1<sub>cis</sub>**: <sup>1</sup>H-NMR (700 MHz, CDCl<sub>3</sub>) δ, ppm: δ 3.85 (s, 1H), 3.29 – 3.25 (m, 1H), 3.20 – 3.16 (m, 1H), 2.38 (m, *J* = 15.3, 6.0, 2.2 Hz, 1H), 2.33 – 2.26 (m, 1H), 1.98 – 1.93 (m, 1H), 1.84 (m, *J* = 13.5, 12.5, 3.1, 1.5 Hz, 1H), 1.73 (m, *J* = 14.1, 6.0, 2.2, 1.7 Hz, 1H), 1.62 (m, *J* = 14.9, 12.5, 2.4 Hz, 1H), 1.51 (m, *J* = 14.7, 5.8, 2.7 Hz, 1H), 1.24 (m, 4H). <sup>13</sup>C {<sup>1</sup>H}-NMR (700 MHz, CDCl<sub>3</sub>) δ, ppm: 71.7, 57.5, 55.5, 43.1, 39.0, 31.4, 27.8, 17.8. GC/MS *m/z* (relative abundance): 142 (M<sup>+</sup>, 100), 128, 112, 100, 84, 58, 41. **P3-1<sub>trans</sub>**: GC/MS *m/z* (relative abundance): 142 (M<sup>+</sup>, 15), 128, 114, 99, 85, 71, 58, 43 (100), 41, 30.



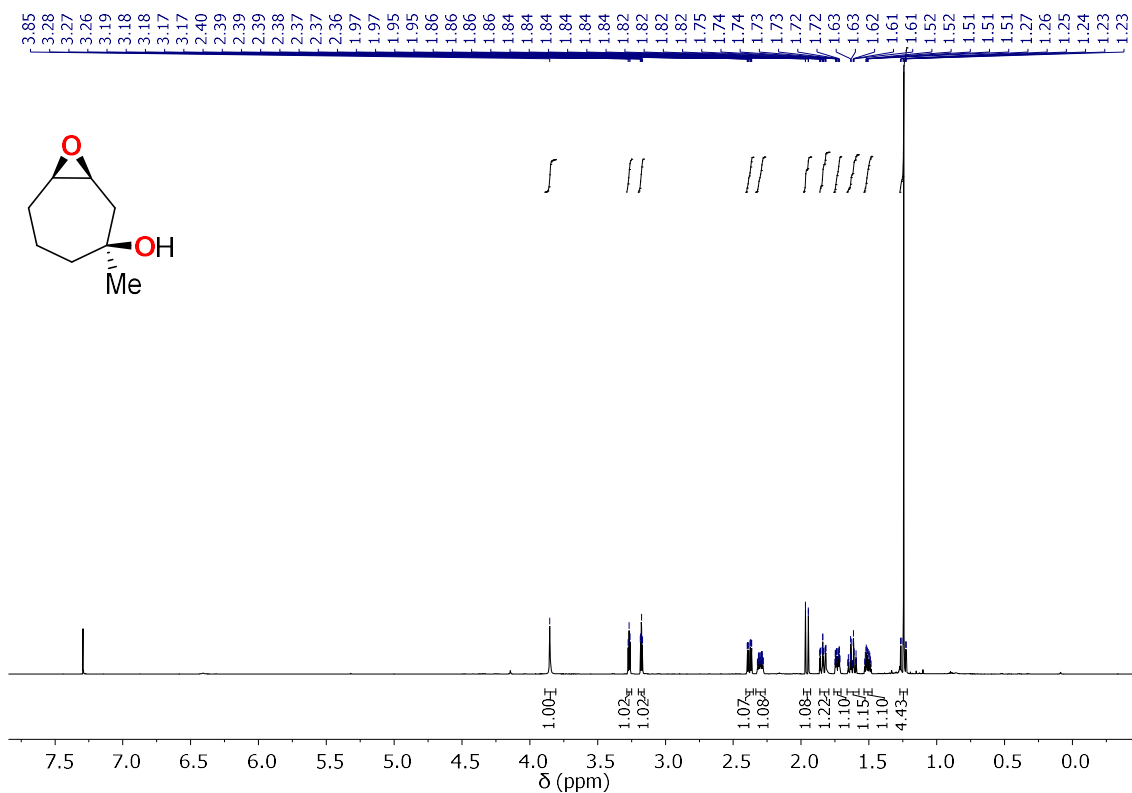

**Figure S1.**  $^1\text{H-NMR}$  (700 MHz,  $\text{CDCl}_3$ ) spectrum of *cis*-3-methyl-8-oxabicyclo[5.1.0]octan-3-ol (**P3-1<sub>cis</sub>**).

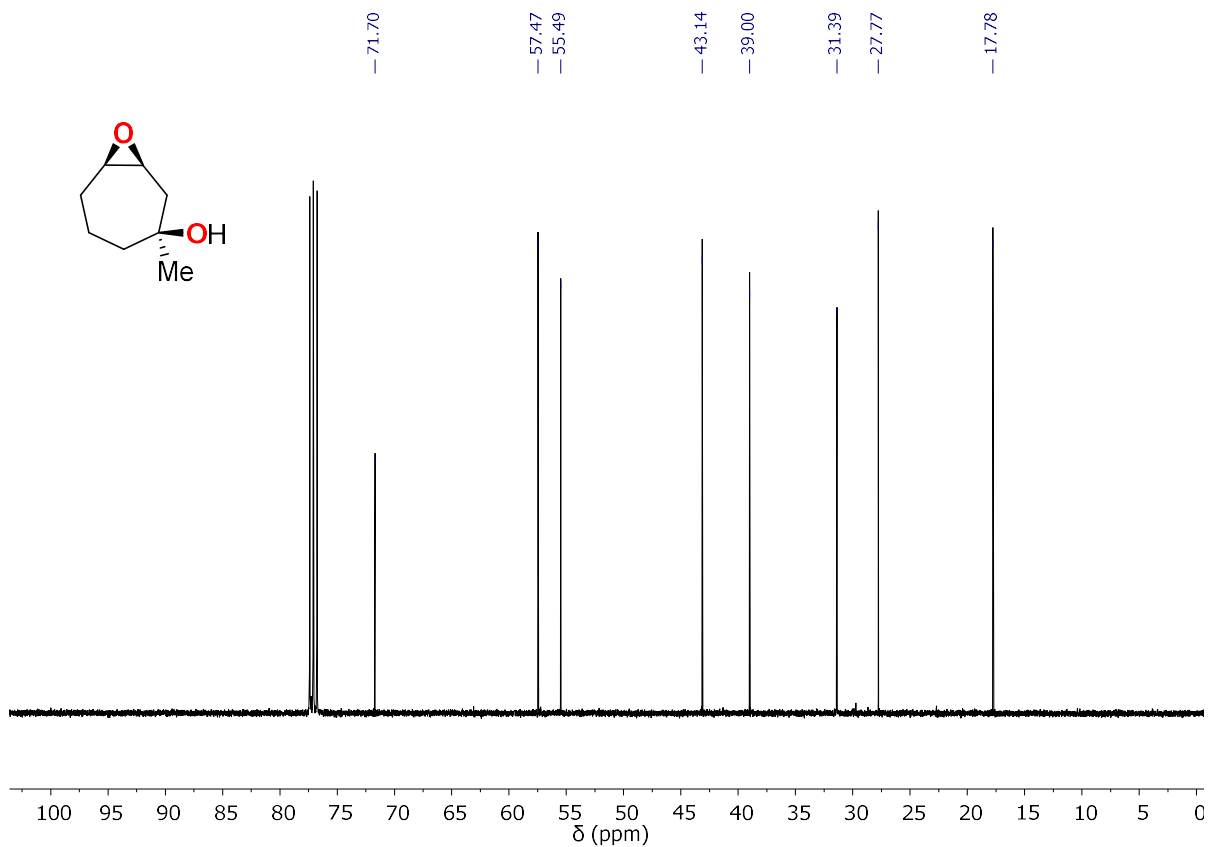

**Figure S2.**  $^{13}\text{C}\{^1\text{H}\}$ -NMR (700 MHz,  $\text{CDCl}_3$ ) spectrum of *cis*-3-methyl-8-oxabicyclo[5.1.0]octan-3-ol (**P3-1<sub>cis</sub>**).

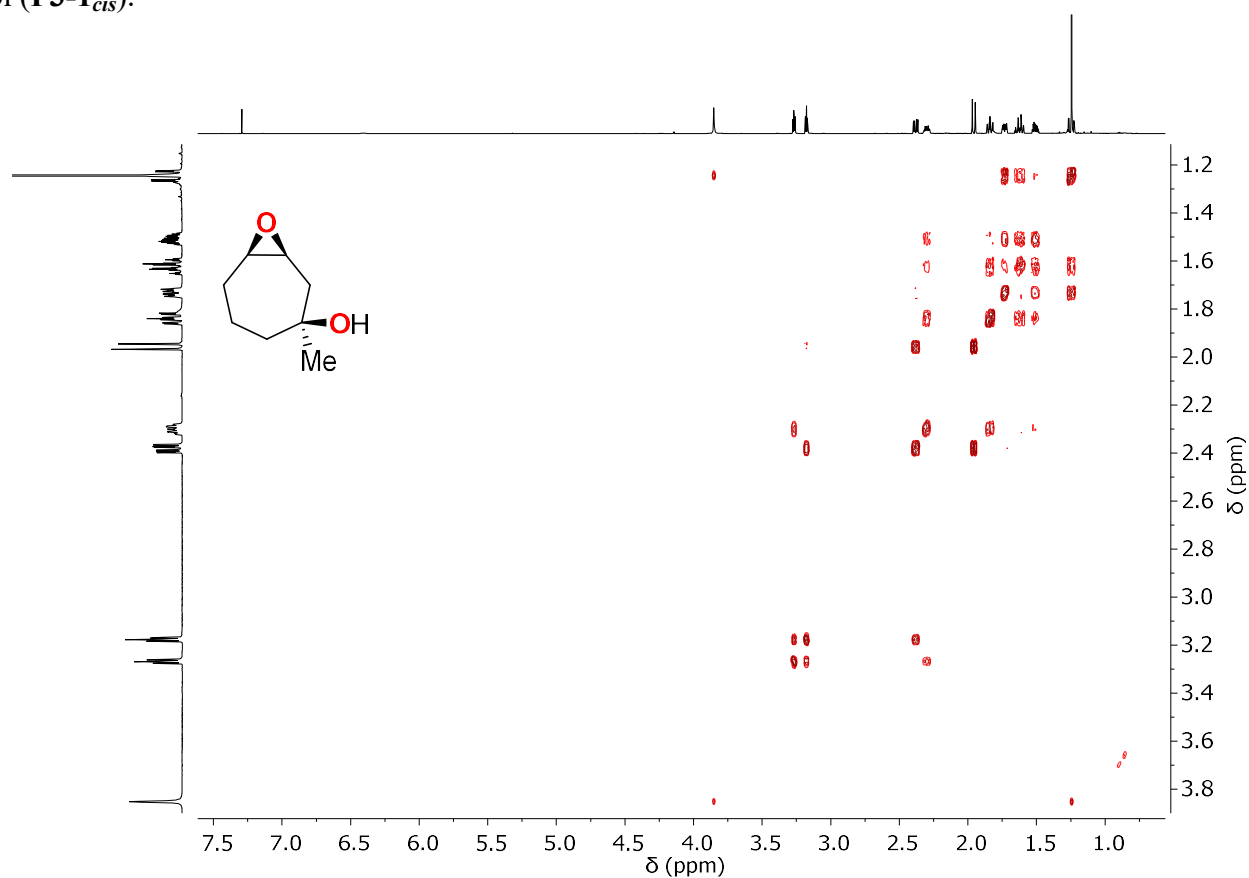

**Figure S3.** COSY-NMR (700 MHz,  $\text{CDCl}_3$ ) spectrum of *cis*-3-methyl-8-oxabicyclo[5.1.0]octan-3-ol (**P3-1<sub>cis</sub>**).

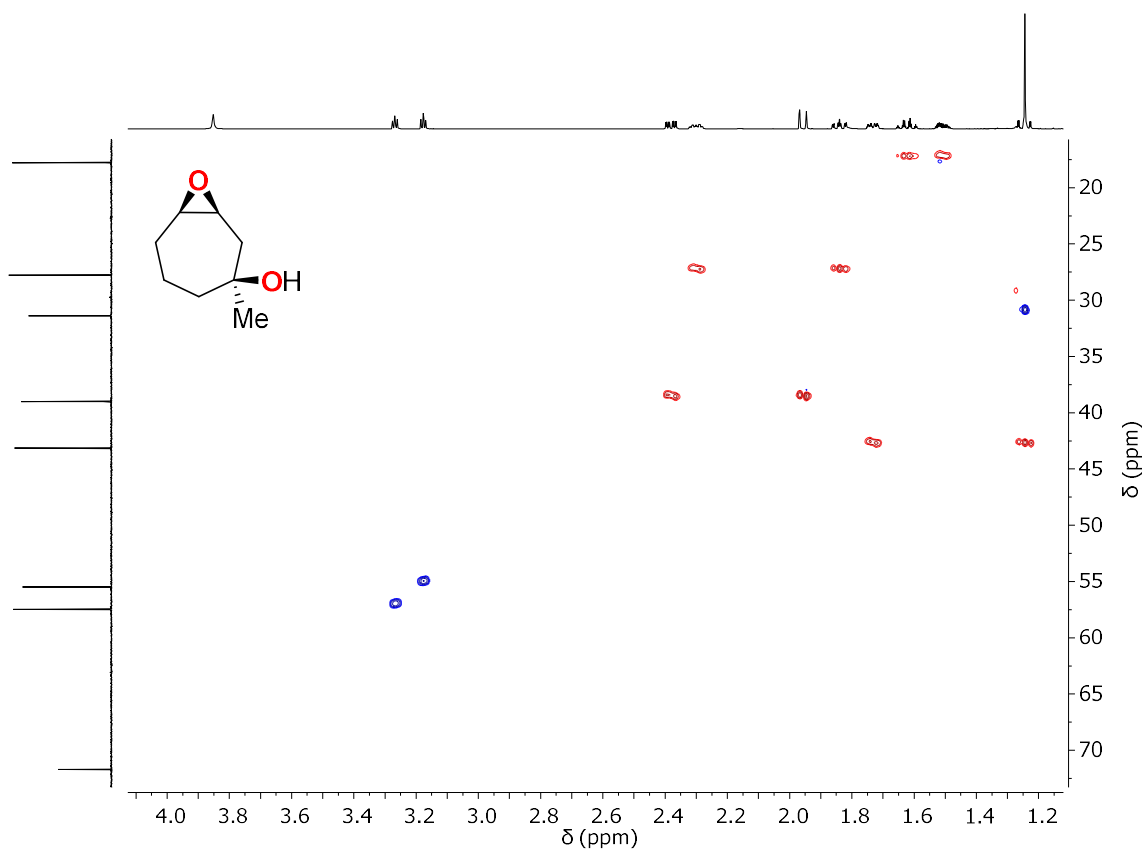

**Figure S4.** HSQC-NMR (700 MHz, CDCl<sub>3</sub>) spectrum of *cis*-3-methyl-8-oxabicyclo[5.1.0]octan-3-ol (**P3-1<sub>cis</sub>**).

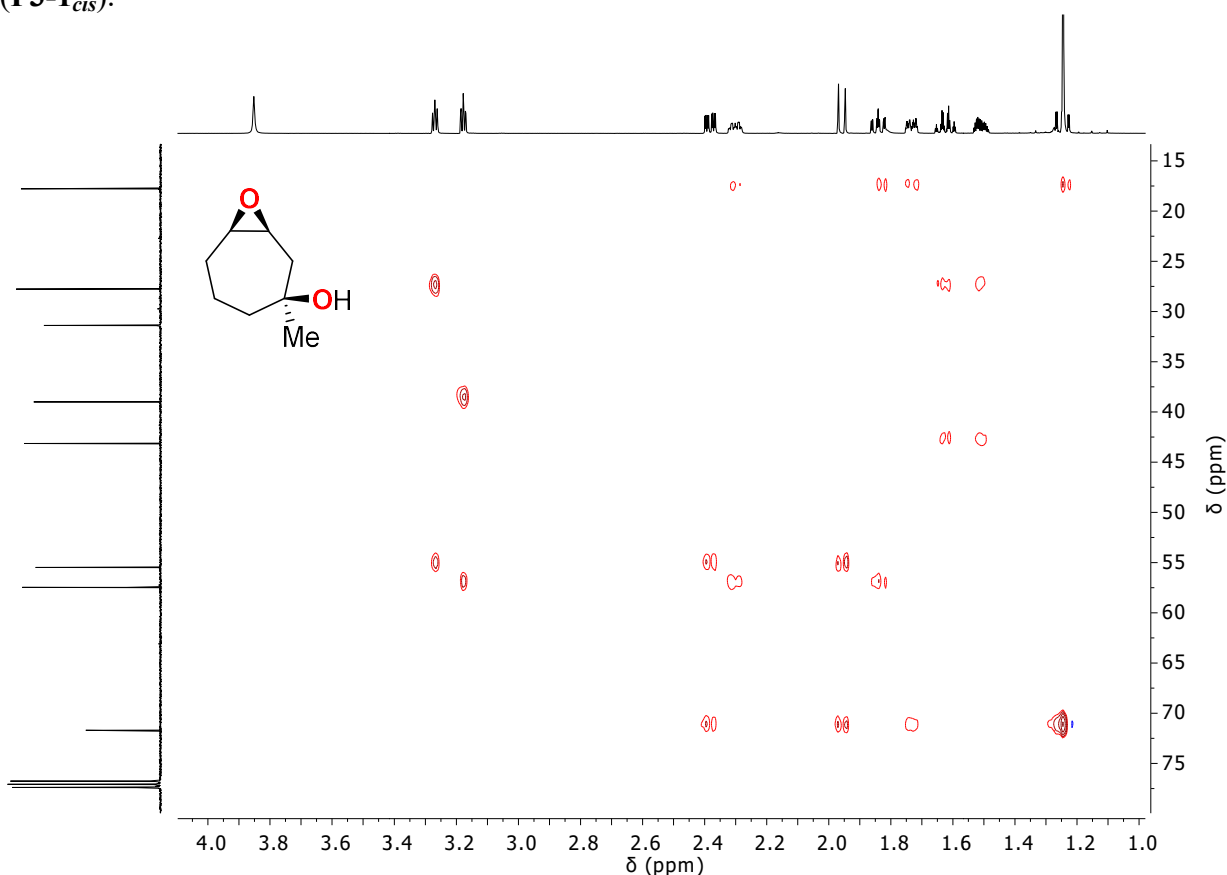

**Figure S5.** 1,1-Adequate-NMR (700 MHz, CDCl<sub>3</sub>) spectrum of *cis*-3-methyl-8-oxabicyclo[5.1.0]octan-3-ol (**P3-1<sub>cis</sub>**).

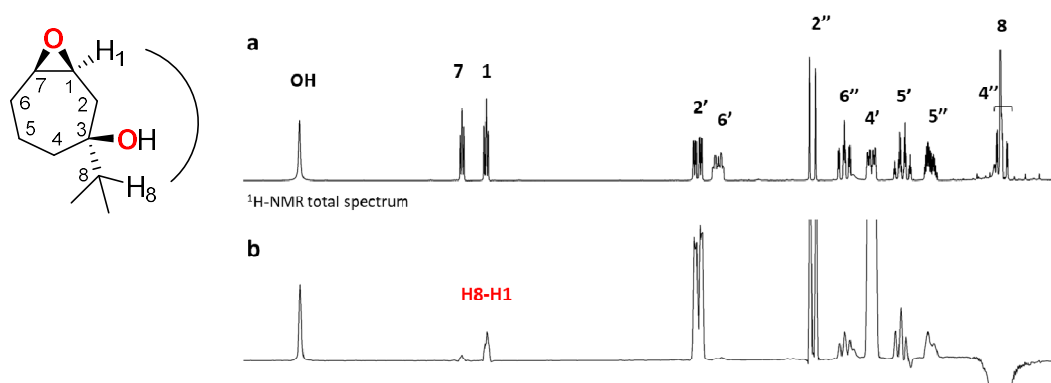

**Figure S6. a)** <sup>1</sup>H-NMR (700 MHz, CDCl<sub>3</sub>) and **b)** selective NOE (700 MHz, CDCl<sub>3</sub>, δ<sub>irr</sub> = 1.24 ppm) spectra of *cis*-3-methyl-8-oxabicyclo[5.1.0]octan-3-ol (**P3-1<sub>cis</sub>**).

The correlation between H<sub>1</sub> and H<sub>8</sub> in selective NOE (irradiation of H<sub>8</sub>, δ<sub>irr</sub> = 1.24 ppm) indicates that the configuration of the molecule is *cis*.

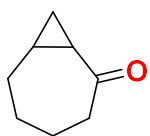

Bicyclo[5.1.0]octan-2-one (**P4-O**). The crude obtained by scale-up ETFDO-mediated oxidation of 1.8 mmol of bicyclo[5.1.0]heptane (**S4**) in 9 hours (two additions after 3 and 6 hours) was oxidized by chromic acid. The purification by flash chromatography over silica gel (eluent hexane:EtOAc 10:1) gave 90 mg (0.72 mmol, 40% yield) of a colorless liquid identified as bicyclo[5.1.0]octan-2-one (**P4-O**). Spectrometric data are consistent with those reported in the literature.<sup>19</sup> GC/MS *m/z* (relative abundance): 124 ( $M^+$ , 40), 95, 80, 67, 55 (100), 39.

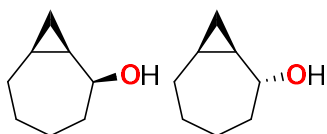

*Cis*-bicyclo[5.1.0]octan-2-ol (**P4a-OH**) and *trans*-bicyclo[5.1.0]octan-2-ol (**P4b-OH**). The crude obtained by the reduction with  $\text{NaBH}_4$  of 0.52 mmol of bicyclo[5.1.0]octan-2-one (**P4-O**) was characterized by a diastereomeric ratio **P4a-OH**:**P4b-OH** equal to 1.5:1. The purification by flash chromatography over silica gel (eluent hexane:EtOAc 3:1) gave 16 mg (0.13 mmol, 25% yield) and 11 mg (0.087 mmol, 17% yield) of colorless liquids, identified as *cis*-bicyclo[5.1.0]octan-2-ol (**P4a-OH**) and *trans*-bicyclo[5.1.0]octan-2-ol (**P4b-OH**), respectively. Spectroscopic data are consistent with those reported in the literature.<sup>20</sup> **P4a-OH**:  $^1\text{H-NMR}$  (400 MHz,  $\text{CDCl}_3$ )  $\delta$ , ppm: 4.20 (dt,  $J = 9.8, 3.3$  Hz, 1H), 1.86 – 1.69 (m, 3H), 1.63 – 1.39 (m, 4H), 1.33 – 1.20 (m, 1H), 1.06 (m,  $J = 44.4, 15.4, 9.5, 5.9, 3.6$  Hz, 3H), 0.55 (q,  $J = 5.6$  Hz, 1H), 0.41 (td,  $J = 8.7, 4.9$  Hz, 1H). **P4b-OH**:  $^1\text{H-NMR}$  (400 MHz,  $\text{CDCl}_3$ )  $\delta$ , ppm: 3.44 – 3.25 (m, 1H), 2.20 (dt,  $J = 12.9, 5.4$  Hz, 1H), 1.90 – 1.74 (m, 3H), 1.67 (dd,  $J = 9.7, 5.0$  Hz, 2H), 1.36 – 1.19 (m, 2H), 0.96 – 0.83 (m, 3H), 0.81 – 0.70 (m, 1H), 0.29 (q,  $J = 4.6, 4.1$  Hz, 1H).

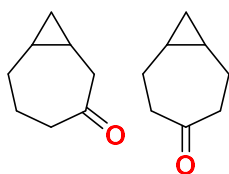

**10-2<sub>k</sub>** **10-3<sub>k</sub>** Bicyclo[5.1.0]octan-3-one (**P4-O3**) and bicyclo[5.1.0]octan-4-one (**P4-O4**). Spectrometric data are consistent with those reported in the literature.<sup>21</sup> **P4-O3**: GC-MS *m/z* (relative abundance): 124 ( $M^+$ , 30), 96, 81, 67 (100), 55, 39. **P4-O4**: GC-MS *m/z* (relative abundance): 124 ( $M^+$ , 50), 109, 96, 83 (100), 67, 55, 39.

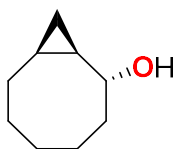

*Trans*-bicyclo[6.1.0]nonan-2-ol (**P5a-OH**). Prepared following the general procedure of scale-up ETFDO-mediated oxidation on 0.9 mmol of bicyclo[6.1.0]nonane (**S5**) in 9 hours (two additions after 3 and 6 hours). The purification by flash chromatography over silica gel (eluent hexane:EtOAc 3:1) gave 30 mg (0.21 mmol, 23% yield) of a white solid identified as *trans*-bicyclo[6.1.0]nonan-2-ol (**P5a-OH**). Spectroscopic data are consistent with those reported in the

literature.<sup>22</sup> <sup>1</sup>H-NMR (400 MHz, CDCl<sub>3</sub>) δ, ppm: 3.26 (m, *J* = 10.5, 9.0, 4.0 Hz, 1H), 2.10 – 2.03 (m, 1H), 1.87 (m, *J* = 11.5, 8.1, 3.1 Hz, 1H), 1.74 – 1.62 (m, 3H), 1.58 – 1.46 (m, 4H), 1.43 – 1.31 (m, 2H), 0.83 (m, *J* = 18.9, 8.4, 4.1, 2.3 Hz, 2H), 0.74 (dd, *J* = 6.4, 2.8 Hz, 1H), 0.10 (q, *J* = 4.4 Hz, 1H).

58 mg of an inseparable mixture of **P5a-OH**, **P5a-O(H)3** and **P5a-O(H)4** were also collected in GC ratio 4.6:1:2.6, respectively.

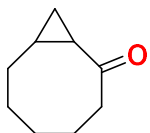

Bicyclo[6.1.0]nonan-2-one (**P5-O**). Prepared following the chromic acid oxidation of 0.17 mmol of *trans*-bicyclo[6.1.0]nonan-2-ol (**P5a-OH**). 15.5 mg (0.11 mmol, 65% yield) of a colorless liquid identified as bicyclo[6.1.0]nonan-2-one (**P5-O**) were collected without any purification. Spectrometric data are consistent with those reported in the literature.<sup>22</sup> GC/MS *m/z* (relative abundance): 138 (*M*<sup>+</sup>, 6), 110, 95, 81, 67, 55 (100), 41.

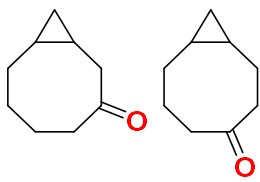

Bicyclo[6.1.0]nonan-3-one (**P5-O3**) and bicyclo[6.1.0]nonan-4-one (**P5-O4**). Spectrometric data are consistent with those reported in the literature.<sup>23</sup> **P5-O3**: GC/MS *m/z* (relative abundance): 138 (*M*<sup>+</sup>, 22), 123, 109, 94, 79, 67, 55, 41 (100). **P5-O4**: GC/MS *m/z* (relative abundance): 138 (*M*<sup>+</sup>, 35), 123, 97 (100), 79, 67, 55, 41.

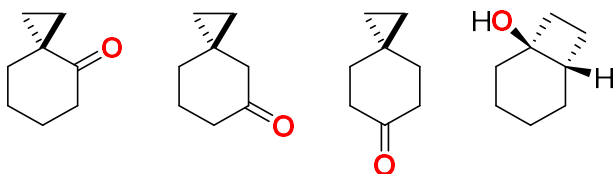

Spiro[2.5]octan-4-one (**P7-O**), spiro[2.5]octan-5-one (**P7-O5**), spiro[2.5]octan-6-one (**P7-O6**) and bicyclo[4.2.0]octan-1-ol (**P7b-OH**). The crude obtained by scale-up ETFDO-mediated oxidation of 0.9 mmol of spiro[2.5]octane (**S7**) in 48 hours (three additions after 6, 16 and 22 hours) was oxidized by chromic acid. The purification by flash chromatography over silica gel (eluent hexane/EtOAc 10:1) gave 35.4 mg (0.29 mmol, 32% yield), 8.6 mg (0.069 mmol, 7.7% yield) and 3.7 mg (0.030 mmol, 3.3% yield) of colorless liquids identified as spiro[2.5]octan-4-one (**P7-O**), spiro[2.5]octan-5-one (**P7-O5**) and spiro[2.5]octan-6-one (**P7-O6**), respectively. By changing the polarity of the eluent (hexane/EtOAc 3:1), 3.4 mg (0.027 mmol, 3% yield) of a white solid identified as bicyclo[4.2.0]octan-1-ol (**P7b-OH**) were also collected. The poor yield values are due to the high volatility of the oxygenated products. Spectroscopic data are consistent with those reported in the literature.<sup>1,24,25</sup> **P7-O**: <sup>1</sup>H-NMR (400 MHz, CDCl<sub>3</sub>) δ, ppm: 2.42 (t, *J* = 6.7 Hz, 2H), 1.84 (m, 2H), 1.83 – 1.75 (m, 2H), 1.65 (dd, *J* = 5.6, 5.9 Hz, 2H), 1.10 (dd, *J* = 3.5, 5.9 Hz, 2H), 0.47 (dd, *J* = 3.5, 5.9 Hz, 2H). **P7-O5**: <sup>1</sup>H-NMR (400 MHz, CDCl<sub>3</sub>) δ, ppm: 2.36 (t, *J* = 6.7 Hz, 2H), 2.14 (s, 2H), 1.93 (m, 2H), 1.54 (m, 2H), 0.34 (m, 4H). **P7b-OH**: <sup>1</sup>H-NMR (400 MHz, CDCl<sub>3</sub>) δ, ppm: δ 2.27 (dt, *J* = 15.3, 7.9 Hz, 1H), 1.89 – 1.70 (m, 3H), 1.57 (qq, *J* = 13.9, 8.2, 7.7 Hz, 6H), 1.35 (m, *J* = 26.7, 11.2, 7.1 Hz, 4H). <sup>13</sup>C-NMR (400

MHz, CDCl<sub>3</sub>)  $\delta$ , ppm: 72.1, 43.7, 36.2, 35.4, 24.2, 21.6, 21.2, 15.8. GC-MS  $m/z$  (relative abundance): 126 (M<sup>+</sup>, 5), 112, 98 (100), 97, 70, 58, 41, 30.

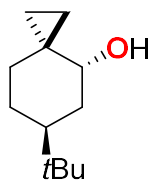

*Trans*-6-(*tert*-butyl)spiro[2.5]octan-4-ol (**P8a-OH**). Prepared following the general procedure of scale-up ETFDO-mediated oxidation on 0.9 mmol of 6-*tert*-butylspiro[2.5]octane (**S8**) in 48 hours (three additions after 6, 16 and 22 hours). The purification by flash chromatography over silica gel (eluent hexane:EtOAc 3:1) gave 37 mg (0.020 mmol, 22% yield) of a white solid identified as *trans*-6-(*tert*-butyl)spiro[2.5]octan-4-ol (**P8a-OH**). Spectroscopic data are consistent with those reported in literature.<sup>1,26</sup> <sup>1</sup>H-NMR (400 MHz, CDCl<sub>3</sub>)  $\delta$ , ppm: 3.09 (s, 1H), 2.16 – 2.06 (m, 1H), 1.91 (m,  $J = 13.3, 3.0$  Hz, 1H), 1.75 (m,  $J = 12.2, 6.4, 3.4$  Hz, 1H), 1.59 – 1.46 (m, 2H), 1.35 (td,  $J = 13.1, 2.8$  Hz, 1H), 1.15 (m,  $J = 12.5, 3.7$  Hz, 1H), 0.89 (s, 9H), 0.80 – 0.72 (m, 1H), 0.47 – 0.41 (m, 1H), 0.36 – 0.27 (m, 3H).

58 mg of an inseparable mixture of **P8a-OH** and **P8b-OH** in GC ratio 4:1 were also collected.

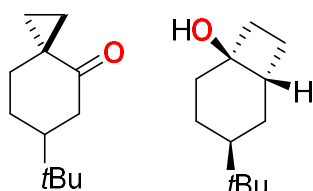

6-(*tert*-butyl)spiro[2.5]octan-4-one (**P8-O**) and *cis*-4-(*tert*-butyl)bicyclo[4.2.0]octan-1-ol (**P8b-OH**). The crude obtained by the ETFDO-mediated oxidation of 0.9 mmol of 6-(*tert*-butyl)spiro[2.5]octane (**S8**) in 48 hours (three additions after 6, 16 and 22 hours) was oxidized by chromic acid. The purification by flash chromatography over silica gel (eluent hexane:EtOAc 10:1) gave 107.8 mg (0.60 mmol, 67% yield) of a colorless liquid and 8.1 mg (0.045 mmol, 5.0% yield) of a white solid identified as 6-(*tert*-butyl)spiro[2.5]octan-4-one (**P8-O**) and 4-(*tert*-butyl)bicyclo[4.2.0]octan-1-ol (**P8b-OH**), respectively. Spectroscopic data are consistent with those reported in literature.<sup>1,26</sup> **P8-O**: <sup>1</sup>H-NMR (400 MHz, CDCl<sub>3</sub>)  $\delta$ , ppm: 2.54 (m,  $J = 16.4, 4.5, 2.2$  Hz, 1H), 2.14 (dd,  $J = 16.4, 12.7$  Hz, 1H), 2.04 – 1.89 (m, 2H), 1.72 – 1.63 (m, 1H), 1.56 (m,  $J = 13.8, 7.0, 3.7$  Hz, 1H), 1.51 – 1.42 (m, 2H), 0.92 (m, 10H), 0.69 (ddd,  $J = 9.5, 6.5, 3.1$  Hz, 1H), 0.58 (m,  $J = 9.0, 6.6, 3.7$  Hz, 1H). **P8b-OH**: <sup>1</sup>H-NMR (400 MHz, CDCl<sub>3</sub>)  $\delta$ , ppm: 2.38 (q,  $J = 9.3$  Hz, 1H), 1.92 – 1.67 (m, 4H), 1.62 – 1.54 (m, 3H), 1.50 (m,  $J = 13.8, 3.8, 1.8$  Hz, 1H), 1.37 – 1.28 (m, 2H), 1.17 (m,  $J = 12.3, 3.9, 2.1$  Hz, 1H), 1.04 (m,  $J = 13.4, 12.6, 11.6, 3.0$  Hz, 1H), 0.87 (s, 9H).

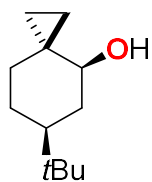

*Cis*-6-(*tert*-butyl)spiro[2.5]octan-4-ol (**P8c-OH**). The crude obtained by the reduction with NaBH<sub>4</sub> of 0.76 mmol of 6-(*tert*-butyl)spiro[2.5]octan-4-one (**P8-O**) was characterized by a diastereomeric ratio **P8c-OH/P8a-OH** equal to 66:1. The purification by flash chromatography over silica gel (eluent hexane:EtOAc 3:1) gave 110.8 mg (0.61 mmol, 80% yield) of a white solid, identified as *cis*-6-(*tert*-butyl)spiro[2.5]octan-4-ol (**P8c-OH**). Spectroscopic data are consistent with

those reported in literature.<sup>1,26</sup> <sup>1</sup>H-NMR (400 MHz, CDCl<sub>3</sub>) δ, ppm: 3.76 (dd, *J* = 10.8, 3.9 Hz, 1H), 2.01 (m, *J* = 11.5, 4.5, 2.5 Hz, 1H), 1.75 (m, *J* = 13.1, 3.5, 1.8 Hz, 1H), 1.66 (dp, *J* = 11.4, 2.6 Hz, 1H), 1.22 (tt, *J* = 12.0, 2.8 Hz, 1H), 1.15 – 0.99 (m, 4H), 0.90 (s, 9H), 0.69 (m, *J* = 9.2, 5.2, 4.0 Hz, 1H), 0.62 – 0.55 (m, 1H), 0.22 – 0.16 (m, 1H), 0.11 – 0.08 (m, 1H).

## S5. Computational Section

Recent studies showed (u) $\omega$ B97X-D/6-311++G(d,p) is apt for evaluating reactivity and selectivity in aliphatic C–H bond oxygenation and hydrogen abstraction by alkoxy radicals.<sup>6,27</sup> Before extensive computational studies, preliminary studies with (u) $\omega$ B97X-D/6-311++G(d,p) resulted in qualitatively good results matching the experimental studies. Thus, (u) $\omega$ B97X-D/6-311++G(d,p) is employed in this work.

### S5.1 Calculated Energetics

**Table S11.** Energies of the optimized structures ((u) $\omega$ B97X-D/6-311++G(d,p)/SMD = water/temperature = 273.15)

| Structure     | E            | ZPE      | H            | T.S      | T.qh-S   | G(T)         | qh-G(T)      |
|---------------|--------------|----------|--------------|----------|----------|--------------|--------------|
| DIOXIRANE     | -605.30521   | 0.09417  | -605.202564  | 0.039375 | 0.038492 | -605.241939  | -605.241056  |
| P7-4-OH       | -918.691376  | 0.300141 | -918.374422  | 0.059605 | 0.056446 | -918.434028  | -918.430868  |
| P7-5-OH       | -918.691175  | 0.300541 | -918.374102  | 0.058662 | 0.055656 | -918.432763  | -918.429757  |
| P7-6-OH       | -918.69091   | 0.300406 | -918.373839  | 0.059578 | 0.056239 | -918.433417  | -918.430078  |
| P7b-OH        | -918.692893  | 0.301308 | -918.375213  | 0.058385 | 0.055434 | -918.433598  | -918.430647  |
| P8a-OH        | -1075.945031 | 0.413034 | -1075.510833 | 0.069647 | 0.065037 | -1075.58048  | -1075.57587  |
| P8b-OH        | -1075.944753 | 0.413719 | -1075.510171 | 0.06854  | 0.064313 | -1075.57871  | -1075.574483 |
| P8c-OH        | -1075.944116 | 0.412903 | -1075.510019 | 0.068828 | 0.064688 | -1075.578848 | -1075.574707 |
| S1-TS1C2cis   | -839.904177  | 0.237246 | -839.653095  | 0.052354 | 0.050358 | -839.705449  | -839.703453  |
| S1-TS1C2trans | -839.905036  | 0.237207 | -839.654049  | 0.052022 | 0.050088 | -839.706072  | -839.704137  |
| S1-TS1C3cis   | -839.903186  | 0.236809 | -839.652645  | 0.051789 | 0.049991 | -839.704435  | -839.702637  |
| S1-TS1C3trans | -839.899765  | 0.236834 | -839.64915   | 0.052241 | 0.050157 | -839.70139   | -839.699307  |
| S1            | -234.620116  | 0.146562 | -234.468325  | 0.030524 | 0.030531 | -234.498849  | -234.498856  |
| S2-TS1C2cis   | -879.221854  | 0.266813 | -878.940383  | 0.054218 | 0.05196  | -878.9946    | -878.992343  |
| S2-TS1C2trans | -879.221252  | 0.266919 | -878.939701  | 0.053836 | 0.051789 | -878.993538  | -878.99149   |
| S2-TS1C3cis   | -879.21725   | 0.266549 | -878.936043  | 0.054347 | 0.052053 | -878.990391  | -878.988096  |
| S2-TS1C3trans | -879.220766  | 0.266598 | -878.939631  | 0.053338 | 0.051466 | -878.992968  | -878.991096  |
| S2            | -273.934721  | 0.176065 | -273.752597  | 0.032624 | 0.032621 | -273.78522   | -273.785218  |
| S3-Int1       | -918.644498  | 0.297835 | -918.329576  | 0.059642 | 0.056574 | -918.389218  | -918.38615   |
| S3-Int2       | -918.692923  | 0.299188 | -918.376583  | 0.060453 | 0.057082 | -918.437035  | -918.433665  |
| S3-TS1C2cis   | -918.537575  | 0.294267 | -918.227164  | 0.057718 | 0.054942 | -918.284882  | -918.282106  |
| S3-TS1C2trans | -918.536748  | 0.294337 | -918.226443  | 0.056736 | 0.054385 | -918.283179  | -918.280828  |
| S3-TS1C5cis   | -918.53849   | 0.294502 | -918.227985  | 0.05749  | 0.05466  | -918.285475  | -918.282645  |
| S3-TS1C5trans | -918.533298  | 0.293935 | -918.223306  | 0.057831 | 0.054932 | -918.281138  | -918.278239  |
| S3-TS2C5cis   | -918.639133  | 0.298245 | -918.325058  | 0.056329 | 0.053981 | -918.381387  | -918.379039  |



|               |              |          |              |          |          |              |              |
|---------------|--------------|----------|--------------|----------|----------|--------------|--------------|
| S3-TS2C5trans | -918.636734  | 0.298637 | -918.322379  | 0.055862 | 0.053614 | -918.378241  | -918.375993  |
| S3-TS3        | -918.639284  | 0.296465 | -918.326333  | 0.057348 | 0.055201 | -918.383681  | -918.381534  |
| S3            | -313.250595  | 0.203552 | -313.039742  | 0.035268 | 0.035258 | -313.07501   | -313.075     |
| S4-TS1C2cis   | -918.532667  | 0.295179 | -918.221917  | 0.055918 | 0.05365  | -918.277834  | -918.275567  |
| S4-TS1C2trans | -918.534008  | 0.295368 | -918.222967  | 0.056823 | 0.054214 | -918.27979   | -918.27718   |
| S4-TS1C3cis   | -918.531993  | 0.295181 | -918.220992  | 0.057632 | 0.054593 | -918.278624  | -918.275585  |
| S4-TS1C3trans | -918.532386  | 0.295032 | -918.221608  | 0.057018 | 0.054211 | -918.278626  | -918.275819  |
| S4            | -313.248374  | 0.204799 | -313.036629  | 0.034631 | 0.034641 | -313.071259  | -313.07127   |
| S5-TS1C2cis   | -957.842455  | 0.323614 | -957.502277  | 0.057771 | 0.055532 | -957.560048  | -957.557808  |
| S5-TS1C2trans | -957.846098  | 0.324649 | -957.504864  | 0.058205 | 0.055707 | -957.563068  | -957.560571  |
| S5-TS1C3cis   | -957.844055  | 0.324259 | -957.503216  | 0.058424 | 0.05584  | -957.56164   | -957.559057  |
| S5-TS1C3trans | -957.844202  | 0.323915 | -957.503615  | 0.058438 | 0.055896 | -957.562053  | -957.559511  |
| S5            | -352.559346  | 0.233789 | -352.317684  | 0.036728 | 0.036734 | -352.354412  | -352.354418  |
| S7-Int1C4     | -918.639459  | 0.298231 | -918.324318  | 0.059764 | 0.056472 | -918.384082  | -918.380791  |
| S7-TS1C4ax    | -918.541061  | 0.294707 | -918.230575  | 0.056827 | 0.054257 | -918.287401  | -918.284831  |
| S7-TS1C4eq    | -918.536678  | 0.294406 | -918.226479  | 0.056582 | 0.054157 | -918.283061  | -918.280636  |
| S7-TS1C5ax    | -918.538514  | 0.293819 | -918.228674  | 0.05872  | 0.055122 | -918.287394  | -918.283795  |
| S7-TS1C5eq    | -918.536489  | 0.294377 | -918.226205  | 0.057687 | 0.054717 | -918.283892  | -918.280922  |
| S7-TS1C6ax    | -918.538524  | 0.294523 | -918.228349  | 0.056185 | 0.05388  | -918.284535  | -918.282229  |
| S7-TS1C6eq    | -918.537355  | 0.294516 | -918.227115  | 0.056592 | 0.054122 | -918.283706  | -918.281237  |
| S7-TS2'C4     | -918.63433   | 0.29933  | -918.319408  | 0.055717 | 0.053539 | -918.375125  | -918.372947  |
| S7-TS2C4      | -918.638015  | 0.298239 | -918.323738  | 0.056911 | 0.054475 | -918.380649  | -918.378213  |
| S7            | -313.254189  | 0.204124 | -313.04303   | 0.034838 | 0.03482  | -313.077868  | -313.077851  |
| S8-Int1       | -1075.893277 | 0.41126  | -1075.460557 | 0.069103 | 0.065112 | -1075.529661 | -1075.525669 |
| S8-Int1a      | -1075.813617 | 0.410199 | -1075.382358 | 0.069636 | 0.065452 | -1075.451995 | -1075.447811 |
| S8-TS1ax      | -1075.793417 | 0.407244 | -1075.365732 | 0.067145 | 0.063224 | -1075.432877 | -1075.428956 |
| S8-TS1eq      | -1075.789562 | 0.406871 | -1075.362213 | 0.068111 | 0.063702 | -1075.430323 | -1075.425915 |
| S8-TS2'       | -1075.887844 | 0.41204  | -1075.455756 | 0.065331 | 0.06219  | -1075.521087 | -1075.517946 |
| S8-TS2        | -1075.891552 | 0.411106 | -1075.46006  | 0.066294 | 0.062813 | -1075.526354 | -1075.522873 |
| S8            | -470.505758  | 0.316413 | -470.17768   | 0.045879 | 0.04469  | -470.223559  | -470.222369  |
| cis-P3-OH2    | -918.689111  | 0.300821 | -918.371609  | 0.059332 | 0.056073 | -918.430941  | -918.427682  |
| cis-P3-OH5    | -918.688458  | 0.300118 | -918.371554  | 0.059548 | 0.056303 | -918.431102  | -918.427857  |
| trans-P3-OH2  | -918.686445  | 0.29966  | -918.369818  | 0.060079 | 0.056681 | -918.429897  | -918.426498  |
| trans-P3-OH5  | -918.683489  | 0.300177 | -918.366377  | 0.059813 | 0.05662  | -918.42619   | -918.422996  |

**Table S12.** Energies of the optimized structures for redox potential calculations ((u)M062X/6-31+G(d,p)/CPCM=acetonitrile)

| Structure  | E           | ZPE      | H           | T.S      | G(T)        |
|------------|-------------|----------|-------------|----------|-------------|
| S8-Int1a-1 | -605.753447 | 0.106743 | -605.636518 | 0.045161 | -605.681679 |
| S8-Int1a-2 | -605.963762 | 0.104964 | -605.848463 | 0.044648 | -605.893111 |
| S8-Int1a-3 | -469.656506 | 0.303762 | -469.338942 | 0.052248 | -469.391190 |
| S8-Int1a-4 | -469.502802 | 0.307143 | -469.182003 | 0.051423 | -469.233426 |

**Table S13.** Energies of the optimized structures for isodesmic reaction calculations (@B97X-D/6-311++G(d,p)/SMD = water/temperature = 273.15)

| Structure  | E           | ZPE      | H           | T.S      | T.qh-S   | G(T)        | qh-G(T)     |
|------------|-------------|----------|-------------|----------|----------|-------------|-------------|
| S8-Int1a-5 | -469.701008 | 0.306084 | -469.383344 | 0.045079 | 0.044340 | -469.428423 | -469.427684 |
| S8a        | -393.121071 | 0.282945 | -392.827941 | 0.042132 | 0.041385 | -392.870073 | -392.869326 |
| S8a-Int1   | -392.294375 | 0.268111 | -392.015701 | 0.042481 | 0.041968 | -392.058182 | -392.057669 |

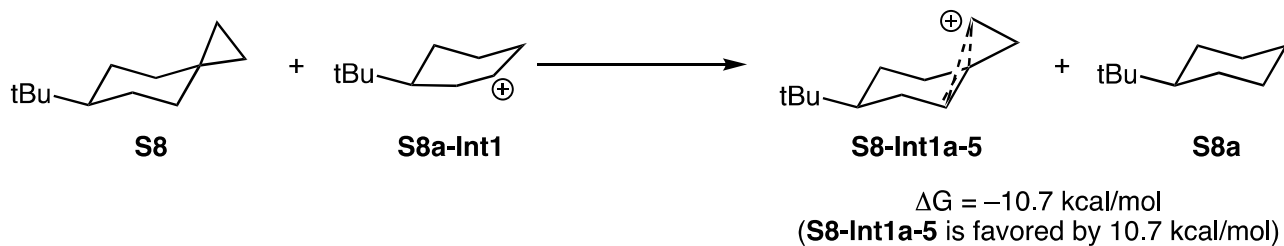

**Scheme S2.** Isodesmic reaction to evaluate the stability between **S8-Int1a-5** and **S8a-Int1**.

## S5.2 Calculated Cartesian Coordinates

### DIOXIRANE

Charge: 0

```

C  1.111390  -0.189144  -0.000006
C  -0.374647  0.198183  -0.000072
C  -1.351790  -0.938146  -0.000046
H  -1.131515  -1.551240  -0.878560
H  -1.131452  -1.551276  0.878428
C  -2.807007  -0.492346  0.000018
H  -3.450286  -1.373722  0.000011
H  -3.042748  0.098971  0.886707
    
```

|   |           |           |           |
|---|-----------|-----------|-----------|
| H | -3.042809 | 0.099031  | -0.886616 |
| F | 1.402950  | -0.922231 | -1.082045 |
| F | 1.402907  | -0.921970 | 1.082224  |
| F | 1.910526  | 0.875464  | -0.000120 |
| O | -0.632255 | 1.345304  | 0.737709  |
| O | -0.632283 | 1.345394  | -0.737692 |

There are no imaginary frequencies

-----

### **P7-4-OH**

**Charge: 0**

|   |           |           |           |
|---|-----------|-----------|-----------|
| C | -2.776485 | -2.061500 | -0.452534 |
| C | -1.797277 | -1.667808 | 0.656774  |
| C | -1.184021 | -0.285451 | 0.432043  |
| C | -2.265137 | 0.750187  | 0.188264  |
| C | -3.245576 | 0.374390  | -0.907496 |
| C | -3.862577 | -0.999408 | -0.636369 |
| H | -0.606486 | 0.000953  | 1.314556  |
| H | -2.330281 | -1.641586 | 1.614276  |
| H | -0.994377 | -2.404787 | 0.751644  |
| H | -2.236691 | -2.195343 | -1.399015 |
| H | -4.022091 | 1.141416  | -0.983849 |
| H | -2.726723 | 0.355207  | -1.875545 |
| H | -4.472046 | -0.945115 | 0.274462  |
| H | -4.532299 | -1.279674 | -1.454752 |
| H | -0.641185 | -0.573087 | -1.448488 |
| C | -2.798651 | 1.464236  | 1.400879  |
| C | -1.920021 | 2.193547  | 0.410294  |
| H | -2.371865 | 1.218214  | 2.367484  |
| H | -3.856682 | 1.702513  | 1.415575  |
| H | -0.907092 | 2.432027  | 0.716594  |
| H | -2.386943 | 2.928240  | -0.236936 |
| H | -3.226370 | -3.029963 | -0.216387 |

|   |           |           |           |
|---|-----------|-----------|-----------|
| C | 2.634513  | -0.876741 | 0.271363  |
| C | 2.374414  | 0.447903  | -0.502703 |
| C | 2.019870  | 1.640209  | 0.321869  |
| H | 1.180352  | 1.368610  | 0.967411  |
| H | 2.868955  | 1.805898  | 0.998663  |
| C | 1.714045  | 2.873705  | -0.508766 |
| H | 0.865564  | 2.693493  | -1.173294 |
| H | 1.461010  | 3.707606  | 0.148329  |
| H | 2.572095  | 3.166281  | -1.117676 |
| F | 2.432206  | -1.947420 | -0.495479 |
| F | 1.884052  | -1.004161 | 1.369736  |
| F | 3.923621  | -0.899388 | 0.665138  |
| O | 2.574621  | 0.436350  | -1.690792 |
| O | -0.218913 | -0.300324 | -0.629123 |

There are no imaginary frequencies

-----

### **P7-5-OH**

**Charge: 0**

|   |           |           |           |
|---|-----------|-----------|-----------|
| C | -1.978064 | 2.099635  | 0.615842  |
| C | -0.982800 | 0.952332  | 0.793949  |
| C | -1.707056 | -0.361065 | 1.093353  |
| C | -2.770683 | -0.658954 | 0.053023  |
| C | -3.762378 | 0.475449  | -0.123016 |
| C | -3.037863 | 1.784803  | -0.442439 |
| H | -0.984490 | -1.179248 | 1.151735  |
| H | -0.626413 | 0.380491  | -1.052590 |
| H | -0.300865 | 1.188860  | 1.614693  |
| H | -2.467461 | 2.274756  | 1.581393  |
| H | -4.478684 | 0.228959  | -0.912804 |
| H | -4.333737 | 0.594989  | 0.807161  |
| H | -2.562605 | 1.702103  | -1.427768 |
| H | -3.753381 | 2.609192  | -0.508204 |

|   |           |           |           |
|---|-----------|-----------|-----------|
| H | -2.181099 | -0.269000 | 2.077898  |
| C | -2.376158 | -1.448576 | -1.175685 |
| C | -3.247009 | -2.070634 | -0.107347 |
| H | -1.354505 | -1.803915 | -1.255759 |
| H | -2.843476 | -1.181971 | -2.117644 |
| H | -2.800834 | -2.831474 | 0.524436  |
| H | -4.295368 | -2.225277 | -0.339474 |
| H | -1.431115 | 3.011714  | 0.359441  |
| C | 2.141139  | -1.180738 | 0.229503  |
| C | 2.472612  | 0.166463  | -0.473384 |
| C | 2.814800  | 1.313486  | 0.417284  |
| H | 1.988764  | 1.448102  | 1.121297  |
| H | 3.668581  | 0.984311  | 1.024670  |
| C | 3.124889  | 2.592126  | -0.340200 |
| H | 2.263478  | 2.914695  | -0.929614 |
| H | 3.372956  | 3.387457  | 0.364736  |
| H | 3.972190  | 2.458380  | -1.016153 |
| F | 1.290988  | -1.918413 | -0.484284 |
| F | 1.632930  | -1.026670 | 1.455775  |
| F | 3.280264  | -1.890230 | 0.356965  |
| O | 2.529816  | 0.153186  | -1.677294 |
| O | -0.134582 | 0.826654  | -0.356312 |

There are no imaginary frequencies

-----

### **P7-6-OH**

**Charge: 0**

|   |          |           |           |
|---|----------|-----------|-----------|
| C | 0.906497 | -0.955970 | -0.747930 |
| C | 1.481573 | 0.370520  | -1.247057 |
| C | 2.367196 | 1.050948  | -0.199668 |
| C | 3.452202 | 0.106417  | 0.279690  |
| C | 2.900445 | -1.204394 | 0.806143  |
| C | 2.016154 | -1.881335 | -0.245255 |

|   |           |           |           |
|---|-----------|-----------|-----------|
| H | 2.809547  | 1.959330  | -0.619074 |
| H | 2.081562  | 0.157642  | -2.139030 |
| H | 0.668914  | 1.033102  | -1.555546 |
| H | 0.271044  | -0.230292 | 0.976391  |
| H | 3.717804  | -1.871853 | 1.094481  |
| H | 2.316558  | -1.010448 | 1.715786  |
| H | 2.632552  | -2.166784 | -1.105423 |
| H | 1.569894  | -2.796788 | 0.153888  |
| H | 1.760930  | 1.368927  | 0.659567  |
| C | 4.743225  | 0.067322  | -0.494828 |
| C | 4.697096  | 0.675039  | 0.891762  |
| H | 4.851512  | 0.741822  | -1.337715 |
| H | 5.239181  | -0.890812 | -0.609266 |
| H | 4.776278  | 1.754300  | 0.971540  |
| H | 5.164241  | 0.121929  | 1.699975  |
| H | 0.370089  | -1.445926 | -1.563688 |
| C | -3.200013 | -0.593104 | -0.014653 |
| C | -2.441967 | 0.679587  | 0.463786  |
| C | -2.061587 | 1.660394  | -0.594515 |
| H | -1.559401 | 1.114144  | -1.396838 |
| H | -3.004255 | 2.019782  | -1.029094 |
| C | -1.213394 | 2.806876  | -0.073485 |
| H | -0.286972 | 2.434421  | 0.370351  |
| H | -0.952873 | 3.475565  | -0.895758 |
| H | -1.747858 | 3.385978  | 0.682410  |
| F | -3.091573 | -1.589301 | 0.862963  |
| F | -2.778526 | -1.038190 | -1.202638 |
| F | -4.509428 | -0.301689 | -0.138812 |
| O | -2.296371 | 0.820161  | 1.651376  |
| O | -0.097074 | -0.755814 | 0.259809  |

There are no imaginary frequencies

-----

**Charge: 0**

|   |           |           |           |
|---|-----------|-----------|-----------|
| C | -4.029946 | 0.933349  | 0.587419  |
| C | -3.667717 | 0.726266  | -0.895790 |
| C | -2.628811 | -0.364124 | -1.104453 |
| C | -1.326104 | -0.195195 | -0.275073 |
| C | -1.487574 | 0.786803  | 0.877314  |
| C | -2.853301 | 0.671765  | 1.554104  |
| H | -2.379555 | -0.463283 | -2.165134 |
| H | -4.572392 | 0.510114  | -1.472926 |
| H | -3.256814 | 1.656852  | -1.304719 |
| H | -4.394491 | 1.956700  | 0.715120  |
| H | -0.687794 | 0.620982  | 1.605965  |
| H | -1.358937 | 1.799293  | 0.475917  |
| H | -2.945444 | -0.327961 | 1.990647  |
| H | -2.897537 | 1.370852  | 2.392795  |
| H | -0.014477 | -0.414427 | -1.705639 |
| C | -2.832512 | -1.759482 | -0.457384 |
| C | -1.390406 | -1.694341 | 0.102496  |
| H | -3.042171 | -2.577125 | -1.148376 |
| H | -3.593384 | -1.761466 | 0.325134  |
| H | -0.686219 | -2.279221 | -0.493927 |
| H | -1.248438 | -1.936872 | 1.158169  |
| C | 2.449307  | -0.923430 | 0.329440  |
| C | 2.519680  | 0.459974  | -0.378825 |
| C | 2.301524  | 1.657565  | 0.483719  |
| H | 1.330925  | 1.539800  | 0.973381  |
| H | 3.046666  | 1.598628  | 1.288121  |
| C | 2.392984  | 2.970002  | -0.273904 |
| H | 1.634038  | 3.021323  | -1.058030 |
| H | 2.231136  | 3.803005  | 0.412329  |
| H | 3.374136  | 3.094526  | -0.737128 |
| F | 2.121071  | -1.896996 | -0.519393 |
| F | 1.585159  | -0.949500 | 1.347710  |
| F | 3.665978  | -1.216358 | 0.829531  |

|   |           |          |           |
|---|-----------|----------|-----------|
| O | 2.831506  | 0.464544 | -1.542658 |
| O | -0.170189 | 0.218168 | -0.997875 |
| H | -4.862411 | 0.277356 | 0.857551  |

There are no imaginary frequencies

-----

**P8a-OH**

**Charge: 0**

|   |           |           |           |
|---|-----------|-----------|-----------|
| C | -2.396660 | -0.166817 | -0.350055 |
| C | -1.253310 | -0.190392 | 0.676515  |
| C | -0.161369 | 0.828025  | 0.377160  |
| C | -0.722946 | 2.214886  | 0.167719  |
| C | -1.866958 | 2.265290  | -0.822262 |
| C | -2.957005 | 1.261055  | -0.443392 |
| H | 0.541057  | 0.854522  | 1.219468  |
| H | -1.644247 | 0.034825  | 1.675077  |
| H | -0.787222 | -1.176857 | 0.728910  |
| H | -1.960870 | -0.406066 | -1.330321 |
| H | -2.275666 | 3.279697  | -0.861190 |
| H | -1.491884 | 2.033549  | -1.826780 |
| H | -3.385693 | 1.551609  | 0.523738  |
| H | -3.762650 | 1.312623  | -1.179429 |
| H | 1.026690  | 1.140106  | -1.143450 |
| C | -0.762477 | 3.117599  | 1.368491  |
| C | 0.238338  | 3.367402  | 0.263421  |
| H | -0.387728 | 2.732867  | 2.310977  |
| H | -1.603718 | 3.796792  | 1.452965  |
| H | 1.281149  | 3.143526  | 0.467707  |
| H | 0.071346  | 4.216522  | -0.390221 |
| C | 2.682172  | -1.670754 | 0.328577  |
| C | 3.189259  | -0.453397 | -0.497618 |
| C | 3.537787  | 0.779163  | 0.270032  |
| H | 2.691548  | 1.033918  | 0.913948  |



|   |           |           |           |
|---|-----------|-----------|-----------|
| H | 4.346738  | 0.491538  | 0.955249  |
| C | 3.938990  | 1.945231  | -0.616024 |
| H | 3.127227  | 2.218009  | -1.295684 |
| H | 4.171469  | 2.814076  | 0.002076  |
| H | 4.819870  | 1.705439  | -1.215121 |
| F | 1.883767  | -2.457616 | -0.391742 |
| F | 2.025576  | -1.317486 | 1.437788  |
| F | 3.743095  | -2.408308 | 0.709285  |
| O | 3.347719  | -0.623129 | -1.680065 |
| O | 0.547498  | 0.383945  | -0.790219 |
| C | -3.477341 | -1.259494 | -0.099439 |
| C | -4.238128 | -1.034854 | 1.213734  |
| H | -4.969113 | -1.836382 | 1.363597  |
| H | -3.567208 | -1.035636 | 2.077737  |
| H | -4.784526 | -0.087423 | 1.208421  |
| C | -4.484486 | -1.261709 | -1.259344 |
| H | -3.973832 | -1.378451 | -2.221510 |
| H | -5.186436 | -2.094464 | -1.148557 |
| H | -5.072826 | -0.341477 | -1.297405 |
| C | -2.815429 | -2.645351 | -0.057073 |
| H | -3.580605 | -3.427986 | -0.038957 |
| H | -2.187683 | -2.808496 | -0.940111 |
| H | -2.191476 | -2.777507 | 0.830510  |

There are no imaginary frequencies

-----

### **P8b-OH**

**Charge: 0**

|   |          |           |           |
|---|----------|-----------|-----------|
| C | 2.916217 | 0.670756  | 0.111784  |
| C | 2.478155 | -0.045782 | 1.424669  |
| C | 1.274618 | -0.974328 | 1.309786  |
| C | 0.088662 | -0.518048 | 0.419911  |
| C | 0.477366 | 0.566922  | -0.571008 |

|   |           |           |           |
|---|-----------|-----------|-----------|
| C | 1.924205  | 0.442051  | -1.043082 |
| H | 0.900239  | -1.211091 | 2.310651  |
| H | 3.304823  | -0.625568 | 1.844728  |
| H | 2.245386  | 0.716235  | 2.175206  |
| H | 2.866690  | 1.747978  | 0.318655  |
| H | -0.210862 | 0.541450  | -1.422170 |
| H | 0.349303  | 1.537624  | -0.075877 |
| H | 2.079992  | -0.531443 | -1.519547 |
| H | 2.098939  | 1.190305  | -1.819016 |
| H | -1.375629 | -0.747750 | 1.693010  |
| C | 1.369783  | -2.276957 | 0.472687  |
| C | 0.001001  | -1.946582 | -0.167660 |
| H | 1.421163  | -3.202783 | 1.047981  |
| H | 2.189900  | -2.268032 | -0.244383 |
| H | -0.818412 | -2.509927 | 0.284953  |
| H | -0.076273 | -2.017251 | -1.255191 |
| C | -3.693292 | -0.647610 | -0.530161 |
| C | -3.620039 | 0.660270  | 0.309666  |
| C | -3.151172 | 1.883598  | -0.404681 |
| H | -2.173285 | 1.660424  | -0.839997 |
| H | -3.828159 | 2.021701  | -1.258065 |
| C | -3.103387 | 3.115592  | 0.481139  |
| H | -2.411101 | 2.970312  | 1.313706  |
| H | -2.762104 | 3.973851  | -0.100204 |
| H | -4.088354 | 3.350069  | 0.890441  |
| F | -3.561245 | -1.733290 | 0.231688  |
| F | -2.774043 | -0.703937 | -1.498086 |
| F | -4.902234 | -0.714231 | -1.121431 |
| O | -4.031419 | 0.607394  | 1.440955  |
| O | -1.071793 | -0.051239 | 1.102964  |
| C | 4.401327  | 0.411850  | -0.278727 |
| C | 4.696584  | -1.074865 | -0.511688 |
| H | 4.090776  | -1.483663 | -1.325730 |
| H | 5.748890  | -1.207963 | -0.784040 |
| H | 4.509398  | -1.674270 | 0.383821  |

|   |          |          |           |
|---|----------|----------|-----------|
| C | 4.745129 | 1.184540 | -1.560567 |
| H | 4.474077 | 2.242032 | -1.467926 |
| H | 5.820745 | 1.129750 | -1.757409 |
| H | 4.229472 | 0.777410 | -2.434350 |
| C | 5.314255 | 0.934997 | 0.840192  |
| H | 6.366240 | 0.799733 | 0.568474  |
| H | 5.145442 | 2.003759 | 1.011322  |
| H | 5.149629 | 0.412549 | 1.786490  |

There are no imaginary frequencies

-----

### **P8c-OH**

**Charge: 0**

|   |           |           |           |
|---|-----------|-----------|-----------|
| C | -2.278716 | -0.245131 | -0.398879 |
| C | -1.138133 | -0.011373 | 0.602245  |
| C | -0.183501 | 1.082918  | 0.135948  |
| C | -0.935821 | 2.383475  | -0.098744 |
| C | -2.074174 | 2.185292  | -1.079585 |
| C | -3.025096 | 1.078158  | -0.623176 |
| H | 0.576032  | 1.233586  | 1.930960  |
| H | -1.547102 | 0.287744  | 1.576544  |
| H | -0.558644 | -0.923812 | 0.758429  |
| H | -1.810342 | -0.516158 | -1.357770 |
| H | -2.618341 | 3.126268  | -1.205744 |
| H | -1.658014 | 1.922551  | -2.061287 |
| H | -3.511894 | 1.388569  | 0.309321  |
| H | -3.812268 | 0.955188  | -1.370562 |
| H | 0.265231  | 0.783999  | -0.817734 |
| C | -1.144380 | 3.335541  | 1.045770  |
| C | -0.209213 | 3.693539  | -0.090939 |
| H | -0.694469 | 3.104101  | 2.005534  |
| H | -2.098396 | 3.848448  | 1.103857  |
| H | 0.853883  | 3.688913  | 0.121555  |

|   |           |           |           |
|---|-----------|-----------|-----------|
| H | -0.534460 | 4.450721  | -0.796567 |
| C | 3.547404  | -0.011898 | -0.373317 |
| C | 2.757683  | -1.147096 | 0.339877  |
| C | 1.867172  | -1.974249 | -0.527344 |
| H | 1.075523  | -1.313614 | -0.900089 |
| H | 2.446028  | -2.257842 | -1.414136 |
| C | 1.296448  | -3.187030 | 0.186231  |
| H | 0.706246  | -2.891822 | 1.056202  |
| H | 0.646710  | -3.742600 | -0.491700 |
| H | 2.093496  | -3.854159 | 0.522534  |
| F | 4.010466  | 0.889710  | 0.489296  |
| F | 2.814975  | 0.626111  | -1.292483 |
| F | 4.607249  | -0.548809 | -1.007440 |
| O | 2.965108  | -1.317076 | 1.513483  |
| O | 0.918244  | 1.210692  | 1.032019  |
| C | -3.197486 | -1.445562 | -0.028043 |
| C | -4.244938 | -1.654003 | -1.131898 |
| H | -4.810402 | -2.572681 | -0.945899 |
| H | -4.963593 | -0.832003 | -1.179246 |
| H | -3.767993 | -1.745810 | -2.113940 |
| C | -3.922043 | -1.230121 | 1.306801  |
| H | -4.556690 | -2.093896 | 1.531001  |
| H | -3.217957 | -1.114628 | 2.135867  |
| H | -4.565271 | -0.345861 | 1.281047  |
| C | -2.357353 | -2.727909 | 0.066541  |
| H | -3.009785 | -3.599775 | 0.178434  |
| H | -1.755426 | -2.870792 | -0.837650 |
| H | -1.680230 | -2.713981 | 0.923736  |

There are no imaginary frequencies

-----

**S1-TS1C2cis**

**Charge: 0**

|   |           |           |           |
|---|-----------|-----------|-----------|
| C | -1.852636 | -0.564363 | 1.123047  |
| C | -1.537553 | -0.880302 | -0.339647 |
| C | -2.717469 | -0.457967 | -1.150467 |
| C | -3.884480 | -0.308624 | -0.178232 |
| C | -3.388087 | -0.663643 | 1.212512  |
| H | -1.341515 | -1.239960 | 1.809150  |
| H | -1.531574 | 0.451356  | 1.366115  |
| H | -1.237541 | -1.913998 | -0.524786 |
| H | -0.596741 | -0.276032 | -0.682214 |
| H | -2.859808 | -0.873709 | -2.139267 |
| H | -4.871646 | -0.635172 | -0.482311 |
| H | -3.797138 | -0.013577 | 1.990550  |
| H | -3.686113 | -1.690358 | 1.444391  |
| C | -3.304125 | 0.901026  | -0.840974 |
| H | -3.887189 | 1.360351  | -1.629939 |
| H | -2.710124 | 1.592257  | -0.250707 |
| C | 2.293683  | -0.761489 | 0.062607  |
| C | 1.578667  | 0.578684  | -0.220405 |
| C | 1.249736  | 1.353452  | 1.036237  |
| H | 0.735800  | 0.681750  | 1.728420  |
| H | 2.202014  | 1.623528  | 1.502269  |
| C | 0.409246  | 2.593826  | 0.769111  |
| H | -0.557759 | 2.332384  | 0.333546  |
| H | 0.225812  | 3.118222  | 1.708875  |
| H | 0.917996  | 3.282545  | 0.091321  |
| F | 2.542751  | -1.445441 | -1.056729 |
| F | 1.560694  | -1.551259 | 0.861892  |
| F | 3.468975  | -0.546888 | 0.674655  |
| O | 2.154897  | 1.252096  | -1.260030 |
| O | 0.565334  | 0.416543  | -1.168284 |

1 imaginary frequency:  $-1019.30 \text{ cm}^{-1}$

-----

**Charge: 0**

|   |           |           |           |
|---|-----------|-----------|-----------|
| C | 2.632911  | -0.528557 | 1.490504  |
| C | 1.539418  | -1.062777 | 0.574033  |
| C | 1.930676  | -0.697987 | -0.820870 |
| C | 2.980240  | 0.389343  | -0.730916 |
| C | 3.214971  | 0.684706  | 0.741558  |
| H | 2.257966  | -0.273856 | 2.483156  |
| H | 3.389962  | -1.307414 | 1.627938  |
| H | 0.574069  | -0.446778 | 0.823153  |
| H | 1.218683  | -2.091636 | 0.749687  |
| H | 1.186982  | -0.713215 | -1.606472 |
| H | 2.976412  | 1.208955  | -1.439173 |
| H | 4.270603  | 0.842548  | 0.978283  |
| H | 2.673403  | 1.594265  | 1.017953  |
| C | 3.373233  | -0.974774 | -1.212566 |
| H | 3.550212  | -1.096692 | -2.274501 |
| H | 3.977752  | -1.609870 | -0.573721 |
| C | -2.254899 | -0.695806 | -0.170199 |
| C | -1.482495 | 0.584697  | 0.221441  |
| C | -1.007949 | 1.383855  | -0.972429 |
| H | -0.483577 | 0.709028  | -1.652927 |
| H | -1.903425 | 1.730959  | -1.496576 |
| C | -0.119205 | 2.558999  | -0.592166 |
| H | 0.790270  | 2.223478  | -0.091140 |
| H | 0.171797  | 3.101217  | -1.493854 |
| H | -0.640165 | 3.255942  | 0.067757  |
| F | -2.642349 | -1.395190 | 0.899070  |
| F | -1.508740 | -1.509038 | -0.933322 |
| F | -3.357285 | -0.384253 | -0.870088 |
| O | -2.096307 | 1.255843  | 1.240254  |
| O | -0.563314 | 0.321558  | 1.240889  |

1 imaginary frequency:  $-1042.57 \text{ cm}^{-1}$

---

**S1-TS1C3cis****Charge: 0**

|   |           |           |           |
|---|-----------|-----------|-----------|
| C | -1.449651 | -1.062636 | 0.506391  |
| C | -2.498357 | -1.666502 | -0.419904 |
| C | -3.581329 | -0.607958 | -0.530613 |
| C | -3.365346 | 0.401860  | 0.571665  |
| C | -2.152404 | -0.028992 | 1.376222  |
| H | -0.815008 | -1.774735 | 1.032459  |
| H | -0.680931 | -0.494283 | -0.176220 |
| H | -2.907039 | -2.566812 | 0.053861  |
| H | -2.077599 | -1.971215 | -1.382321 |
| H | -4.580461 | -0.917443 | -0.811860 |
| H | -4.206489 | 0.836282  | 1.097899  |
| H | -1.496544 | 0.796464  | 1.665026  |
| H | -2.478308 | -0.518680 | 2.301704  |
| C | -3.144993 | 0.794584  | -0.867095 |
| H | -3.887702 | 1.444465  | -1.314882 |
| H | -2.132276 | 0.958926  | -1.220508 |
| C | 2.330487  | -0.653495 | 0.129471  |
| C | 1.433906  | 0.518321  | -0.333355 |
| C | 1.208778  | 1.556490  | 0.743654  |
| H | 0.784932  | 1.048423  | 1.614193  |
| H | 2.190457  | 1.935414  | 1.042434  |
| C | 0.305265  | 2.696291  | 0.295196  |
| H | -0.686357 | 2.332822  | 0.017623  |
| H | 0.186733  | 3.409223  | 1.113435  |
| H | 0.729548  | 3.228861  | -0.558471 |
| F | 2.416894  | -1.613917 | -0.794030 |
| F | 1.874456  | -1.219154 | 1.256789  |
| F | 3.575892  | -0.214968 | 0.374189  |
| O | 1.783715  | 0.941455  | -1.585718 |
| O | 0.308001  | 0.058153  | -1.018870 |

1 imaginary frequency:  $-967.46 \text{ cm}^{-1}$

---

**S1-TS1C3trans**

**Charge: 0**

|   |           |           |           |
|---|-----------|-----------|-----------|
| C | 1.481002  | -1.251757 | 0.702303  |
| C | 1.782760  | -1.217941 | -0.790616 |
| C | 2.636595  | 0.027179  | -0.994888 |
| C | 3.127307  | 0.488598  | 0.361383  |
| C | 2.569027  | -0.457375 | 1.417519  |
| H | 1.235867  | -2.227738 | 1.124360  |
| H | 0.874718  | -1.202461 | -1.395049 |
| H | 2.326940  | -2.130310 | -1.064297 |
| H | 2.333951  | 0.752322  | -1.740756 |
| H | 3.187081  | 1.546045  | 0.587474  |
| H | 3.335592  | -1.145686 | 1.793313  |
| H | 2.174763  | 0.080730  | 2.282368  |
| C | 4.095180  | -0.081557 | -0.640006 |
| H | 4.784312  | 0.604747  | -1.119108 |
| H | 4.493984  | -1.074276 | -0.450045 |
| H | 0.496076  | -0.637546 | 0.866712  |
| C | -2.312030 | -0.584278 | -0.251979 |
| C | -1.440430 | 0.584225  | 0.262505  |
| C | -0.823607 | 1.406634  | -0.846913 |
| H | -0.245377 | 0.734061  | -1.485496 |
| H | -1.643770 | 1.796745  | -1.456534 |
| C | 0.051566  | 2.540704  | -0.332421 |
| H | 0.862170  | 2.163868  | 0.293752  |
| H | 0.497137  | 3.068001  | -1.178233 |
| H | -0.529124 | 3.261011  | 0.247350  |
| F | -2.797898 | -1.324260 | 0.747641  |
| F | -1.622737 | -1.404189 | -1.059402 |
| F | -3.357292 | -0.114269 | -0.951163 |
| O | -2.049210 | 1.240935  | 1.294348  |



O -0.599190 0.167610 1.298050

1 imaginary frequency:  $-968.43 \text{ cm}^{-1}$

---

### S1

**Charge: 0**

|   |           |           |           |
|---|-----------|-----------|-----------|
| C | 1.394177  | 0.000128  | 0.414991  |
| C | 0.671780  | 1.222715  | -0.181441 |
| C | -0.753810 | 0.754833  | -0.417898 |
| C | -0.753618 | -0.754825 | -0.418060 |
| C | 0.672140  | -1.222773 | -0.181386 |
| H | 2.463348  | 0.000406  | 0.193959  |
| H | 1.292619  | 0.000050  | 1.503401  |
| H | 1.117895  | 1.497976  | -1.143105 |
| H | 0.735976  | 2.097748  | 0.472824  |
| H | -1.377349 | 1.307386  | -1.111142 |
| H | -1.377003 | -1.307348 | -1.111464 |
| H | 0.736460  | -2.098005 | 0.472149  |
| H | 1.118284  | -1.496863 | -1.143392 |
| C | -1.432567 | -0.000192 | 0.697469  |
| H | -2.516595 | -0.000253 | 0.699230  |
| H | -0.982247 | -0.000416 | 1.685486  |

There are no imaginary frequencies

---

### S2-TS1C2cis

**Charge: 0**

|   |          |           |           |
|---|----------|-----------|-----------|
| C | 2.806059 | 1.366164  | -0.307548 |
| C | 1.820179 | 0.735631  | -1.283990 |
| C | 1.303254 | -0.608056 | -0.798456 |
| C | 2.298219 | -1.502647 | -0.120320 |

|   |           |           |           |
|---|-----------|-----------|-----------|
| C | 2.695304  | -1.249286 | 1.325331  |
| C | 3.675044  | -0.959041 | 0.236330  |
| C | 4.031751  | 0.467638  | -0.129507 |
| H | 4.592147  | 0.453837  | -1.071467 |
| H | 4.700473  | 0.883851  | 0.631077  |
| H | 4.485262  | -1.672701 | 0.127955  |
| H | 2.215858  | -0.411955 | 1.821303  |
| H | 2.858874  | -2.119244 | 1.950089  |
| H | 2.244146  | -2.547178 | -0.403567 |
| H | 0.749995  | -1.135981 | -1.576746 |
| H | 0.474130  | -0.379226 | -0.007254 |
| H | 0.982521  | 1.406457  | -1.489410 |
| H | 2.325429  | 0.565685  | -2.244659 |
| H | 2.312837  | 1.537285  | 0.656195  |
| H | 3.122399  | 2.345309  | -0.676005 |
| C | -2.525052 | -0.707757 | -0.312442 |
| C | -1.743314 | 0.387596  | 0.447097  |
| C | -1.680508 | 1.701624  | -0.297075 |
| H | -1.262184 | 1.506852  | -1.288327 |
| H | -2.710483 | 2.038193  | -0.446964 |
| C | -0.868704 | 2.763184  | 0.430978  |
| H | 0.165523  | 2.444556  | 0.575490  |
| H | -0.859793 | 3.681612  | -0.159080 |
| H | -1.299292 | 2.993174  | 1.407727  |
| F | -2.505596 | -1.876950 | 0.331636  |
| F | -2.025062 | -0.916010 | -1.539734 |
| F | -3.810587 | -0.347670 | -0.457238 |
| O | -2.057625 | 0.400271  | 1.776213  |
| O | -0.554877 | -0.112166 | 0.978699  |

1 imaginary frequency:  $-1090.37 \text{ cm}^{-1}$

-----

**S2-TS1C2trans**

**Charge: 0**

|   |           |           |           |
|---|-----------|-----------|-----------|
| C | 2.792379  | 0.743819  | 1.303161  |
| C | 2.339615  | -0.675002 | 1.643718  |
| C | 1.292376  | -1.150545 | 0.657001  |
| C | 1.637225  | -0.967432 | -0.782129 |
| C | 2.983953  | -1.432011 | -1.301847 |
| C | 2.697426  | 0.038519  | -1.169481 |
| C | 3.423380  | 0.841110  | -0.090841 |
| H | 3.453550  | 1.891197  | -0.393561 |
| H | 4.464130  | 0.503533  | -0.037622 |
| H | 2.513294  | 0.566737  | -2.098502 |
| H | 3.678766  | -1.865860 | -0.590356 |
| H | 2.998567  | -1.877641 | -2.289528 |
| H | 0.812134  | -1.102055 | -1.471416 |
| H | 0.363113  | -0.461648 | 0.855626  |
| H | 0.888476  | -2.141453 | 0.880925  |
| H | 3.193866  | -1.364542 | 1.615216  |
| H | 1.934312  | -0.720883 | 2.657417  |
| H | 3.504924  | 1.101692  | 2.050842  |
| H | 1.918154  | 1.401627  | 1.359017  |
| C | -2.485228 | -0.631859 | -0.089958 |
| C | -1.632889 | 0.634456  | 0.152314  |
| C | -1.140075 | 1.274778  | -1.127003 |
| H | -0.683994 | 0.503035  | -1.751180 |
| H | -2.027560 | 1.629784  | -1.659554 |
| C | -0.163451 | 2.418029  | -0.892434 |
| H | 0.105252  | 2.867625  | -1.850306 |
| H | -0.602627 | 3.196839  | -0.265283 |
| H | 0.752996  | 2.066313  | -0.416459 |
| F | -1.801049 | -1.568225 | -0.764766 |
| F | -3.576823 | -0.331485 | -0.811314 |
| F | -2.898505 | -1.185503 | 1.052638  |
| O | -2.189068 | 1.444978  | 1.099822  |
| O | -0.716960 | 0.431202  | 1.187767  |

1 imaginary frequency:  $-1055.96 \text{ cm}^{-1}$

---

**S2-TS1C3cis**

**Charge: 0**

|   |           |           |           |
|---|-----------|-----------|-----------|
| C | 1.492806  | -0.690751 | -0.785805 |
| C | 1.260310  | -0.482908 | 0.692321  |
| C | 2.230748  | 0.490568  | 1.333083  |
| C | 3.679554  | 0.193060  | 0.935018  |
| C | 4.225390  | 0.749050  | -0.358313 |
| C | 3.977907  | -0.728217 | -0.227040 |
| C | 2.841942  | -1.403491 | -0.969959 |
| H | 2.743259  | -2.428757 | -0.596393 |
| H | 3.074538  | -1.474154 | -2.037451 |
| H | 4.866406  | -1.342382 | -0.121991 |
| H | 3.538105  | 1.326936  | -0.968967 |
| H | 5.252036  | 1.096644  | -0.376968 |
| H | 4.375353  | 0.153031  | 1.765415  |
| H | 2.133918  | 0.446865  | 2.419522  |
| H | 1.969335  | 1.509071  | 1.026294  |
| H | 0.192999  | -0.023601 | 0.855320  |
| H | 1.190206  | -1.433198 | 1.230690  |
| H | 1.494223  | 0.273862  | -1.303553 |
| H | 0.701140  | -1.299870 | -1.225537 |
| C | -2.602997 | -0.776761 | -0.004812 |
| C | -1.935314 | 0.612937  | 0.109507  |
| C | -1.488951 | 1.174075  | -1.223310 |
| H | -0.948621 | 0.393749  | -1.764713 |
| H | -2.396423 | 1.390581  | -1.794530 |
| C | -0.626163 | 2.420608  | -1.084404 |
| H | 0.306605  | 2.200583  | -0.560247 |
| H | -0.374888 | 2.801010  | -2.076369 |
| H | -1.149572 | 3.211033  | -0.542034 |
| F | -2.990207 | -1.246463 | 1.183625  |

|   |           |           |           |
|---|-----------|-----------|-----------|
| F | -1.773876 | -1.683915 | -0.542608 |
| F | -3.691509 | -0.710018 | -0.787651 |
| O | -2.633489 | 1.435183  | 0.949710  |
| O | -1.016472 | 0.641458  | 1.161978  |

1 imaginary frequency:  $-944.69 \text{ cm}^{-1}$

---

## S2-TS1C3trans

Charge: 0

|   |           |           |           |
|---|-----------|-----------|-----------|
| C | 2.312317  | -1.277912 | 1.326130  |
| C | 1.196057  | -1.478354 | 0.325502  |
| C | 1.556687  | -1.113675 | -1.099614 |
| C | 2.392553  | 0.151837  | -1.227866 |
| C | 3.886962  | 0.082219  | -1.015375 |
| C | 3.020739  | 0.777043  | -0.002274 |
| C | 2.771203  | 0.181728  | 1.368410  |
| H | 1.989499  | 0.770594  | 1.861299  |
| H | 3.670196  | 0.270159  | 1.986431  |
| H | 3.072915  | 1.861038  | -0.011046 |
| H | 4.297080  | -0.888603 | -0.752975 |
| H | 4.526333  | 0.690054  | -1.645268 |
| H | 2.054353  | 0.845685  | -1.989613 |
| H | 0.648315  | -1.025141 | -1.698977 |
| H | 2.104984  | -1.970364 | -1.514654 |
| H | 0.716428  | -2.456427 | 0.395591  |
| H | 0.340938  | -0.750033 | 0.674287  |
| H | 3.143335  | -1.932341 | 1.029640  |
| H | 1.997948  | -1.599748 | 2.321338  |
| C | -2.496065 | -0.522908 | -0.286143 |
| C | -1.584726 | 0.569219  | 0.319983  |
| C | -1.007123 | 1.510192  | -0.714484 |
| H | -0.438262 | 0.912310  | -1.430673 |
| H | -1.845847 | 1.949188  | -1.262471 |

|   |           |           |           |
|---|-----------|-----------|-----------|
| C | -0.133673 | 2.599001  | -0.107606 |
| H | 0.677598  | 2.173485  | 0.485238  |
| H | 0.310094  | 3.196796  | -0.906130 |
| H | -0.716070 | 3.265925  | 0.531240  |
| F | -2.930336 | -1.383799 | 0.637729  |
| F | -1.865169 | -1.233874 | -1.232282 |
| F | -3.575802 | 0.036541  | -0.855326 |
| O | -2.135496 | 1.104479  | 1.449396  |
| O | -0.701713 | 0.026430  | 1.257563  |

1 imaginary frequency:  $-964.47 \text{ cm}^{-1}$

-----

## S2

**Charge: 0**

|   |           |           |           |
|---|-----------|-----------|-----------|
| C | 1.325570  | -0.764231 | 0.472931  |
| C | 1.566336  | 0.605125  | -0.158389 |
| C | 0.345094  | 1.515684  | 0.000254  |
| C | -0.972184 | 0.830214  | -0.354000 |
| C | -1.698463 | 0.015657  | 0.690909  |
| C | -1.038108 | -0.677991 | -0.468793 |
| C | 0.216035  | -1.508716 | -0.273996 |
| H | 0.598475  | -1.788280 | -1.263133 |
| H | -0.031909 | -2.442825 | 0.242188  |
| H | -1.715385 | -1.062284 | -1.225138 |
| H | -1.223220 | -0.062568 | 1.664443  |
| H | -2.781845 | 0.052730  | 0.716936  |
| H | -1.609506 | 1.380821  | -1.037671 |
| H | 0.467927  | 2.402408  | -0.627804 |
| H | 0.303898  | 1.874348  | 1.035716  |
| H | 2.442030  | 1.087143  | 0.286449  |
| H | 1.785407  | 0.466422  | -1.224769 |
| H | 1.058331  | -0.638629 | 1.529471  |
| H | 2.240117  | -1.363733 | 0.449821  |

There are no imaginary frequencies

-----

**S3-Int1**

**Charge: 0**

|   |           |           |           |
|---|-----------|-----------|-----------|
| C | 1.989700  | 1.841109  | -0.661094 |
| C | 2.976088  | 1.660343  | 0.489283  |
| C | 2.629309  | 0.403866  | 1.283586  |
| C | 2.636467  | -0.855094 | 0.471562  |
| C | 3.541734  | -0.986253 | -0.636923 |
| C | 2.182763  | -0.629590 | -1.285702 |
| C | 1.609981  | 0.596092  | -1.362512 |
| H | 0.715003  | 0.659672  | -1.975591 |
| H | -0.757125 | -0.079318 | 1.844077  |
| H | 1.670864  | -1.469753 | -1.735820 |
| H | 4.314885  | -0.240680 | -0.771075 |
| H | 3.826635  | -1.992522 | -0.922544 |
| C | 1.902798  | -2.034488 | 1.012667  |
| H | 1.912749  | -2.880534 | 0.325598  |
| H | 0.877757  | -1.771329 | 1.277431  |
| H | 2.420879  | -2.328987 | 1.932963  |
| H | 1.661998  | 0.507845  | 1.779405  |
| H | 3.379823  | 0.237302  | 2.065794  |
| H | 4.000593  | 1.607963  | 0.117577  |
| H | 2.926777  | 2.527259  | 1.149204  |
| H | 2.378009  | 2.538775  | -1.414321 |
| H | 1.052913  | 2.290832  | -0.310575 |
| C | -2.088442 | -1.029443 | -0.275862 |
| C | -2.059787 | 0.351582  | 0.453709  |
| C | -2.117572 | 1.468168  | -0.608629 |
| H | -1.301925 | 1.339711  | -1.325779 |
| H | -3.054399 | 1.349718  | -1.161073 |
| C | -2.050299 | 2.863136  | -0.000178 |

|   |           |           |           |
|---|-----------|-----------|-----------|
| H | -2.867630 | 3.029991  | 0.706127  |
| H | -1.106496 | 3.023767  | 0.527651  |
| H | -2.127231 | 3.621103  | -0.784085 |
| F | -1.128767 | -1.180782 | -1.216460 |
| F | -3.264095 | -1.243783 | -0.905500 |
| F | -1.928158 | -2.055332 | 0.587239  |
| O | -3.017531 | 0.383188  | 1.377705  |
| O | -0.726385 | 0.423272  | 1.023304  |

There are no imaginary frequencies

-----

### S3-Int2

**Charge: 0**

|   |           |           |           |
|---|-----------|-----------|-----------|
| C | 3.463343  | 1.302288  | -1.040255 |
| C | 1.946685  | 1.096915  | -1.117587 |
| C | 1.558451  | -0.382089 | -1.189238 |
| C | 1.405880  | -1.100275 | 0.163636  |
| C | 2.249701  | -0.464613 | 1.282715  |
| C | 3.710780  | -0.271363 | 0.958632  |
| C | 4.208605  | 0.495663  | -0.012380 |
| H | 5.292682  | 0.545350  | -0.101758 |
| H | -0.100542 | -1.311643 | 1.416375  |
| H | 4.418426  | -0.798619 | 1.593680  |
| H | 1.794034  | 0.496682  | 1.538755  |
| H | 2.155615  | -1.096105 | 2.171457  |
| C | 1.720500  | -2.585168 | 0.014198  |
| H | 1.476557  | -3.122028 | 0.936193  |
| H | 2.782254  | -2.734686 | -0.201142 |
| H | 1.138105  | -3.015882 | -0.805573 |
| H | 2.310374  | -0.910971 | -1.784043 |
| H | 0.608626  | -0.505787 | -1.717334 |
| H | 1.451298  | 1.583028  | -0.273548 |
| H | 1.584688  | 1.608067  | -2.014476 |



|   |           |           |           |
|---|-----------|-----------|-----------|
| H | 3.691379  | 2.364632  | -0.887410 |
| H | 3.896092  | 1.053871  | -2.018314 |
| C | -2.909458 | -0.415907 | -0.367832 |
| C | -2.226872 | 0.633661  | 0.556372  |
| C | -1.539596 | 1.771021  | -0.121040 |
| H | -0.844269 | 1.352713  | -0.853790 |
| H | -2.308839 | 2.289687  | -0.708445 |
| C | -0.841869 | 2.709259  | 0.847248  |
| H | -0.345722 | 3.508703  | 0.294202  |
| H | -1.551056 | 3.162707  | 1.543014  |
| H | -0.084936 | 2.175263  | 1.427830  |
| F | -2.276072 | -0.584330 | -1.532575 |
| F | -4.159312 | 0.001343  | -0.648375 |
| F | -3.007019 | -1.604722 | 0.226220  |
| O | -2.375977 | 0.494283  | 1.743692  |
| O | 0.018472  | -0.955778 | 0.530067  |

There are no imaginary frequencies

-----

### **S3-TS1C2cis**

**Charge: 0**

|   |          |           |           |
|---|----------|-----------|-----------|
| C | 3.196181 | 1.495204  | -0.947652 |
| C | 1.862480 | 1.540794  | -0.196001 |
| C | 1.218310 | 0.170970  | -0.269607 |
| C | 2.057434 | -0.997174 | 0.136222  |
| C | 2.823728 | -0.925925 | 1.435296  |
| C | 3.574194 | -0.787460 | 0.140849  |
| C | 4.182866 | 0.553315  | -0.254427 |
| H | 5.036787 | 0.375167  | -0.912970 |
| H | 4.574725 | 1.048493  | 0.641108  |
| H | 4.132771 | -1.664497 | -0.170355 |
| H | 2.714522 | -0.030179 | 2.038986  |
| H | 2.920536 | -1.848754 | 1.996745  |

|   |           |           |           |
|---|-----------|-----------|-----------|
| C | 1.513870  | -2.341359 | -0.286211 |
| H | 2.182748  | -3.149782 | 0.019720  |
| H | 1.390382  | -2.390640 | -1.372771 |
| H | 0.535415  | -2.520565 | 0.172462  |
| H | 0.767112  | 0.002014  | -1.252487 |
| H | 0.295755  | 0.172612  | 0.441480  |
| H | 2.035304  | 1.836046  | 0.844723  |
| H | 1.191165  | 2.280803  | -0.637861 |
| H | 3.623964  | 2.499123  | -1.016088 |
| H | 3.012669  | 1.151513  | -1.972465 |
| C | -2.433729 | -0.866451 | -0.367095 |
| C | -2.052867 | 0.442410  | 0.362262  |
| C | -2.047063 | 1.654747  | -0.541949 |
| H | -1.316141 | 1.470489  | -1.334629 |
| H | -3.028771 | 1.717860  | -1.019919 |
| C | -1.721866 | 2.945778  | 0.195960  |
| H | -1.697661 | 3.774250  | -0.514557 |
| H | -2.474723 | 3.172001  | 0.953716  |
| H | -0.746138 | 2.890440  | 0.683099  |
| F | -1.680963 | -1.073858 | -1.457305 |
| F | -3.715077 | -0.814912 | -0.766891 |
| F | -2.302327 | -1.936527 | 0.420375  |
| O | -2.664720 | 0.523907  | 1.582546  |
| O | -0.948572 | 0.267616  | 1.192524  |

1 imaginary frequency:  $-1078.90 \text{ cm}^{-1}$

-----

### S3-TS1C2trans

Charge: 0

|   |          |           |           |
|---|----------|-----------|-----------|
| C | 2.228052 | -1.872950 | 0.759940  |
| C | 1.524855 | -1.577021 | -0.562524 |
| C | 1.207098 | -0.100113 | -0.667877 |
| C | 2.319752 | 0.848474  | -0.342459 |

|   |           |           |           |
|---|-----------|-----------|-----------|
| C | 3.638476  | 0.629823  | -1.062618 |
| C | 3.519642  | 0.308881  | 0.405738  |
| C | 3.572165  | -1.147284 | 0.862131  |
| H | 3.922346  | -1.182368 | 1.896975  |
| H | 4.315704  | -1.684864 | 0.263197  |
| H | 3.990064  | 1.022938  | 1.074186  |
| H | 3.716685  | -0.208344 | -1.747238 |
| H | 4.179111  | 1.520819  | -1.362767 |
| C | 1.888951  | 2.274331  | -0.092069 |
| H | 2.755021  | 2.928788  | 0.033561  |
| H | 1.279885  | 2.338139  | 0.814829  |
| H | 1.290977  | 2.654407  | -0.927484 |
| H | 0.677626  | 0.177215  | -1.584338 |
| H | 2.164274  | -1.869386 | -1.405858 |
| H | 0.602676  | -2.154858 | -0.655303 |
| H | 2.380566  | -2.948996 | 0.877208  |
| H | 1.572413  | -1.551398 | 1.577853  |
| H | 0.395004  | 0.099544  | 0.154341  |
| C | -2.368770 | -0.949574 | -0.302242 |
| C | -1.936771 | 0.369602  | 0.378295  |
| C | -2.085847 | 1.577694  | -0.520854 |
| H | -1.356021 | 1.468869  | -1.328310 |
| H | -3.077890 | 1.538248  | -0.979415 |
| C | -1.890048 | 2.897336  | 0.211744  |
| H | -1.925568 | 3.719921  | -0.505248 |
| H | -2.675696 | 3.060085  | 0.952115  |
| H | -0.924732 | 2.934689  | 0.719717  |
| F | -1.805760 | -1.099463 | -1.510235 |
| F | -3.700683 | -0.962251 | -0.475417 |
| F | -2.049540 | -2.021188 | 0.427274  |
| O | -2.396831 | 0.434997  | 1.663761  |
| O | -0.726160 | 0.230940  | 1.055508  |

1 imaginary frequency:  $-1020.19 \text{ cm}^{-1}$

---

### S3-TS1C5cis

Charge: 0

|   |           |           |           |
|---|-----------|-----------|-----------|
| C | -1.916118 | -1.816483 | -0.992022 |
| C | -2.896909 | -0.835183 | -1.622178 |
| C | -3.793850 | -0.218609 | -0.548896 |
| C | -3.034336 | 0.414069  | 0.605020  |
| C | -1.879735 | 1.308755  | 0.296987  |
| C | -1.613723 | -0.074792 | 0.877054  |
| C | -1.010115 | -1.156827 | 0.036111  |
| H | -0.494319 | -1.898556 | 0.647851  |
| H | -0.136634 | -0.678606 | -0.572946 |
| H | -1.302389 | -0.075986 | 1.916045  |
| H | -1.600287 | 1.464521  | -0.739022 |
| H | -1.697420 | 2.154671  | 0.950713  |
| C | -3.887277 | 0.746709  | 1.806876  |
| H | -3.293352 | 1.206404  | 2.601346  |
| H | -4.360448 | -0.154424 | 2.210229  |
| H | -4.681827 | 1.448239  | 1.529472  |
| H | -4.437778 | -1.007257 | -0.139490 |
| H | -4.458298 | 0.532834  | -0.990038 |
| H | -2.349181 | -0.056150 | -2.164210 |
| H | -3.517142 | -1.351579 | -2.359333 |
| H | -1.310371 | -2.317112 | -1.751987 |
| H | -2.481871 | -2.603059 | -0.474795 |
| C | 2.582175  | -0.540333 | 0.690514  |
| C | 2.021674  | 0.318658  | -0.465742 |
| C | 1.596283  | 1.701810  | -0.028184 |
| H | 0.785219  | 1.579647  | 0.694505  |
| H | 2.436157  | 2.155979  | 0.505512  |
| C | 1.157098  | 2.585891  | -1.186724 |
| H | 0.780127  | 3.534036  | -0.798353 |
| H | 1.988942  | 2.802461  | -1.859816 |
| H | 0.358309  | 2.118205  | -1.765854 |

|   |          |           |           |
|---|----------|-----------|-----------|
| F | 1.751034 | -0.559086 | 1.743711  |
| F | 3.756200 | -0.044038 | 1.112257  |
| F | 2.791324 | -1.806368 | 0.321680  |
| O | 2.765200 | 0.184835  | -1.602844 |
| O | 1.126617 | -0.406189 | -1.253600 |

1 imaginary frequency:  $-1079.31 \text{ cm}^{-1}$

-----

### S3-TS1C5trans

**Charge: 0**

|   |           |           |           |
|---|-----------|-----------|-----------|
| C | 1.489585  | 1.557911  | -0.359900 |
| C | 2.919996  | 1.650472  | -0.900894 |
| C | 3.876047  | 0.847940  | -0.018778 |
| C | 3.439578  | -0.587549 | 0.227584  |
| C | 3.015566  | -1.418135 | -0.957455 |
| C | 1.981395  | -0.928717 | 0.039474  |
| C | 0.996172  | 0.123331  | -0.399429 |
| H | 0.509493  | -0.129739 | -1.345332 |
| H | 1.580319  | -1.695253 | 0.695203  |
| H | 3.018828  | -0.955971 | -1.939407 |
| H | 3.254342  | -2.476124 | -0.950798 |
| C | 4.195029  | -1.284914 | 1.334629  |
| H | 3.852143  | -2.315559 | 1.461029  |
| H | 4.059703  | -0.761837 | 2.287192  |
| H | 5.267972  | -1.309858 | 1.114863  |
| H | 3.949528  | 1.348808  | 0.954829  |
| H | 4.883841  | 0.848995  | -0.449461 |
| H | 2.950152  | 1.292386  | -1.935681 |
| H | 3.234907  | 2.697019  | -0.920574 |
| H | 0.810167  | 2.199992  | -0.924893 |
| H | 1.492097  | 1.914211  | 0.676812  |
| H | 0.106599  | 0.066891  | 0.358749  |
| C | -2.619906 | -1.002398 | -0.325890 |

|   |           |           |           |
|---|-----------|-----------|-----------|
| C | -2.225387 | 0.287594  | 0.430713  |
| C | -2.305313 | 1.532250  | -0.425982 |
| H | -1.614922 | 1.399431  | -1.264129 |
| H | -3.313596 | 1.582564  | -0.846400 |
| C | -1.977088 | 2.804818  | 0.342143  |
| H | -2.012374 | 3.658623  | -0.337258 |
| H | -2.695661 | 2.981645  | 1.144973  |
| H | -0.976459 | 2.760830  | 0.776845  |
| F | -1.924490 | -1.151712 | -1.462963 |
| F | -3.922113 | -0.967111 | -0.651566 |
| F | -2.420206 | -2.097416 | 0.411634  |
| O | -2.775808 | 0.310733  | 1.683008  |
| O | -1.057922 | 0.107202  | 1.173516  |

1 imaginary frequency:  $-973.31 \text{ cm}^{-1}$

-----

### **S3-TS2C5cis**

**Charge: 0**

|   |           |           |           |
|---|-----------|-----------|-----------|
| C | 1.352348  | -1.864711 | -0.057783 |
| C | 2.547514  | -1.852796 | 0.881822  |
| C | 3.685686  | -1.038860 | 0.268396  |
| C | 3.294463  | 0.381076  | -0.090409 |
| C | 2.391625  | 1.107029  | 0.789803  |
| C | 1.782282  | 0.599350  | -0.545533 |
| C | 0.971590  | -0.548540 | -0.608118 |
| H | 0.226357  | -0.571657 | -1.394066 |
| H | -0.737726 | -0.683961 | 1.470114  |
| H | 1.586839  | 1.378527  | -1.270209 |
| H | 2.010677  | 0.645057  | 1.690448  |
| H | 2.449228  | 2.188570  | 0.811727  |
| C | 4.293837  | 1.140298  | -0.924523 |
| H | 3.936949  | 2.144426  | -1.163002 |
| H | 4.503493  | 0.608154  | -1.855682 |

|   |           |           |           |
|---|-----------|-----------|-----------|
| H | 5.230576  | 1.233138  | -0.366428 |
| H | 4.042190  | -1.538493 | -0.639064 |
| H | 4.531431  | -0.985881 | 0.960407  |
| H | 2.261748  | -1.453062 | 1.857702  |
| H | 2.880297  | -2.878644 | 1.048600  |
| H | 0.477471  | -2.371839 | 0.353474  |
| H | 1.600835  | -2.433508 | -0.969851 |
| C | -2.687266 | -0.648949 | -0.331538 |
| C | -1.986947 | 0.497420  | 0.465901  |
| C | -1.744652 | 1.692915  | -0.474096 |
| H | -1.145483 | 1.376057  | -1.332774 |
| H | -2.719182 | 2.006452  | -0.860143 |
| C | -1.066945 | 2.862799  | 0.227806  |
| H | -0.925330 | 3.689909  | -0.472523 |
| H | -1.670892 | 3.230044  | 1.061129  |
| H | -0.085279 | 2.581639  | 0.616676  |
| F | -2.067839 | -0.986339 | -1.485803 |
| F | -3.948984 | -0.316681 | -0.668694 |
| F | -2.768893 | -1.782614 | 0.393979  |
| O | -2.657731 | 0.742560  | 1.575464  |
| O | -0.640265 | -0.037111 | 0.760507  |

1 imaginary frequency:  $-160.77 \text{ cm}^{-1}$

-----

### **S3-TS2C5trans**

**Charge: 0**

|   |          |           |           |
|---|----------|-----------|-----------|
| C | 1.507337 | 1.540802  | -1.062871 |
| C | 2.643361 | 1.826099  | -0.061487 |
| C | 2.863172 | 0.707974  | 0.959123  |
| C | 2.898730 | -0.684161 | 0.355492  |
| C | 3.369573 | -0.851995 | -1.020415 |
| C | 1.835148 | -0.946165 | -0.751979 |
| C | 1.029277 | 0.151104  | -1.129221 |

|   |           |           |           |
|---|-----------|-----------|-----------|
| H | 0.159244  | -0.034275 | -1.745375 |
| H | -0.029308 | 0.553965  | 1.248543  |
| H | 1.406277  | -1.936346 | -0.821629 |
| H | 3.713499  | -0.002733 | -1.596507 |
| H | 3.786132  | -1.808327 | -1.312365 |
| C | 3.071554  | -1.811336 | 1.342498  |
| H | 3.039232  | -2.783840 | 0.846267  |
| H | 2.285043  | -1.778613 | 2.101159  |
| H | 4.037550  | -1.715114 | 1.846928  |
| H | 2.082301  | 0.724581  | 1.726603  |
| H | 3.810969  | 0.879445  | 1.477944  |
| H | 3.571683  | 1.997190  | -0.609940 |
| H | 2.422730  | 2.753887  | 0.468433  |
| H | 1.849698  | 1.728968  | -2.093256 |
| H | 0.648173  | 2.200047  | -0.938737 |
| C | -2.361127 | -0.982032 | -0.219479 |
| C | -1.846764 | 0.288660  | 0.520243  |
| C | -2.129783 | 1.537982  | -0.335667 |
| H | -1.609691 | 1.454830  | -1.294309 |
| H | -3.202163 | 1.562567  | -0.552397 |
| C | -1.725354 | 2.823324  | 0.376550  |
| H | -1.845398 | 3.680067  | -0.291117 |
| H | -2.342643 | 2.996600  | 1.260680  |
| H | -0.680160 | 2.795203  | 0.699976  |
| F | -1.873216 | -1.128613 | -1.472884 |
| F | -3.703000 | -0.956522 | -0.338479 |
| F | -2.055624 | -2.112780 | 0.439612  |
| O | -2.299270 | 0.323835  | 1.754653  |
| O | -0.369150 | 0.040114  | 0.506364  |

1 imaginary frequency:  $-185.69 \text{ cm}^{-1}$

-----

**S3-TS3**

**Charge: 0**



|   |           |           |           |
|---|-----------|-----------|-----------|
| C | 3.734122  | 0.873586  | -1.085196 |
| C | 2.216721  | 1.023361  | -1.211213 |
| C | 1.499960  | -0.315405 | -1.123996 |
| C | 1.462781  | -0.959337 | 0.201209  |
| C | 2.075208  | -0.296954 | 1.360923  |
| C | 3.570813  | -0.474993 | 1.082819  |
| C | 4.245520  | 0.051312  | 0.060246  |
| H | 5.312741  | -0.156377 | 0.025494  |
| H | -0.935087 | -0.769754 | 1.686613  |
| H | 4.088604  | -1.113690 | 1.789986  |
| H | 1.812975  | 0.758491  | 1.406385  |
| H | 1.804094  | -0.789410 | 2.291507  |
| C | 1.080167  | -2.373858 | 0.278662  |
| H | 0.652046  | -2.630008 | 1.246989  |
| H | 2.025458  | -2.929563 | 0.179060  |
| H | 0.435959  | -2.668150 | -0.549164 |
| H | 1.925494  | -1.051726 | -1.820451 |
| H | 0.451663  | -0.243506 | -1.433262 |
| H | 1.822631  | 1.712518  | -0.460575 |
| H | 1.991761  | 1.468370  | -2.182473 |
| H | 4.204208  | 1.862324  | -1.040071 |
| H | 4.122086  | 0.410987  | -2.001605 |
| C | -2.597111 | -0.506012 | -0.448644 |
| C | -1.917976 | 0.487950  | 0.545260  |
| C | -1.464912 | 1.742121  | -0.227240 |
| H | -0.812919 | 1.460278  | -1.058453 |
| H | -2.359252 | 2.197680  | -0.662742 |
| C | -0.753771 | 2.752452  | 0.663789  |
| H | -0.460135 | 3.629052  | 0.080692  |
| H | -1.401893 | 3.092230  | 1.475402  |
| H | 0.150694  | 2.327413  | 1.106684  |
| F | -1.838018 | -0.823178 | -1.523380 |
| F | -3.751461 | -0.010803 | -0.941129 |
| F | -2.905583 | -1.676041 | 0.146473  |

|   |           |           |          |
|---|-----------|-----------|----------|
| O | -2.720288 | 0.702998  | 1.579014 |
| O | -0.690301 | -0.203287 | 0.946309 |

1 imaginary frequency:  $-80.21 \text{ cm}^{-1}$

-----

**S3**

**Charge: 0**

|   |           |           |           |
|---|-----------|-----------|-----------|
| C | 1.933522  | 0.081547  | -0.502395 |
| C | 1.366157  | 1.137420  | 0.442952  |
| C | -0.103291 | 1.405057  | 0.116082  |
| C | -0.957764 | 0.150901  | 0.021217  |
| C | -0.908129 | -0.851336 | 1.142517  |
| C | -0.266822 | -1.179610 | -0.190312 |
| C | 1.252382  | -1.274534 | -0.297877 |
| H | 1.512074  | -1.939948 | -1.125971 |
| H | 1.653732  | -1.739967 | 0.610101  |
| H | -0.816860 | -1.888698 | -0.801806 |
| H | -0.235883 | -0.662600 | 1.974348  |
| H | -1.830140 | -1.357226 | 1.410351  |
| C | -2.293602 | 0.368948  | -0.652673 |
| H | -2.879241 | -0.554226 | -0.683495 |
| H | -2.159580 | 0.720526  | -1.681604 |
| H | -2.881481 | 1.122683  | -0.116342 |
| H | -0.148946 | 1.916096  | -0.854611 |
| H | -0.544069 | 2.090145  | 0.850084  |
| H | 1.474301  | 0.799073  | 1.480766  |
| H | 1.929576  | 2.071064  | 0.357275  |
| H | 3.013149  | -0.025414 | -0.360795 |
| H | 1.778655  | 0.418133  | -1.535361 |

There are no imaginary frequencies

-----

**S4-TS1C2cis****Charge: 0**

|   |           |           |           |
|---|-----------|-----------|-----------|
| C | -2.978647 | -0.538013 | -1.202000 |
| C | -2.810310 | -1.563225 | -0.099598 |
| C | -1.878049 | -1.293796 | 1.047113  |
| C | -1.537545 | -2.361538 | 0.034832  |
| H | -0.738228 | -2.138872 | -0.664011 |
| H | -1.598878 | -3.397136 | 0.347894  |
| C | -1.121071 | -0.003391 | 1.151121  |
| C | -1.949644 | 1.267521  | 1.245413  |
| C | -2.606495 | 1.736856  | -0.056503 |
| C | -3.601253 | 0.776487  | -0.714781 |
| H | -4.048897 | 1.295908  | -1.568626 |
| H | -4.421884 | 0.556676  | -0.020348 |
| H | -3.117056 | 2.682864  | 0.151457  |
| H | -1.812805 | 1.966514  | -0.778444 |
| H | -1.313404 | 2.073320  | 1.623064  |
| H | -2.723612 | 1.091772  | 2.005497  |
| H | -0.470375 | 0.109590  | 0.177985  |
| H | -0.364051 | -0.053657 | 1.937159  |
| H | -2.195061 | -1.661388 | 2.020462  |
| H | -3.724638 | -2.083980 | 0.169824  |
| H | -2.009911 | -0.324096 | -1.667096 |
| H | -3.604886 | -0.974699 | -1.986598 |
| C | 2.381836  | -0.842567 | 0.060833  |
| C | 1.767581  | 0.503767  | -0.390680 |
| C | 1.995087  | 1.630083  | 0.594632  |
| H | 1.591162  | 1.315828  | 1.561042  |
| H | 3.075623  | 1.742871  | 0.720342  |
| C | 1.362834  | 2.942326  | 0.151928  |
| H | 0.283181  | 2.840616  | 0.023346  |
| H | 1.542155  | 3.706237  | 0.910904  |
| H | 1.790960  | 3.293833  | -0.789024 |
| F | 2.108529  | -1.829028 | -0.796562 |

|   |          |           |           |
|---|----------|-----------|-----------|
| F | 1.930706 | -1.222138 | 1.265750  |
| F | 3.718244 | -0.740105 | 0.145015  |
| O | 2.018639 | 0.737418  | -1.715966 |
| O | 0.468530 | 0.331604  | -0.863598 |

1 imaginary frequency:  $-923.06 \text{ cm}^{-1}$

---

#### S4-TS1C2trans

Charge: 0

|   |           |           |           |
|---|-----------|-----------|-----------|
| C | 3.717515  | 0.199408  | -1.027741 |
| C | 3.010278  | 1.343928  | -0.335078 |
| C | 1.706087  | 1.092159  | 0.400138  |
| C | 1.722178  | 1.928429  | -0.849615 |
| H | 1.302037  | 1.477279  | -1.743418 |
| H | 1.557848  | 2.995456  | -0.753471 |
| C | 1.162918  | -0.298347 | 0.396508  |
| C | 1.958779  | -1.309369 | 1.204331  |
| C | 3.148257  | -1.872589 | 0.408728  |
| C | 4.214998  | -0.870742 | -0.043594 |
| H | 5.021351  | -1.439668 | -0.518121 |
| H | 4.656978  | -0.378566 | 0.831699  |
| H | 3.628215  | -2.637449 | 1.028513  |
| H | 2.756639  | -2.389644 | -0.476190 |
| H | 1.312878  | -2.146516 | 1.485562  |
| H | 2.309481  | -0.842958 | 2.131394  |
| H | 0.947259  | -0.665555 | -0.610416 |
| H | 1.601358  | 1.616981  | 1.344504  |
| H | 3.676142  | 2.035273  | 0.172835  |
| H | 3.054169  | -0.266572 | -1.765131 |
| H | 4.566402  | 0.604398  | -1.587806 |
| H | 0.103157  | -0.236171 | 0.885284  |
| C | -2.475061 | -0.920022 | -0.566651 |
| C | -2.148955 | 0.273346  | 0.360619  |

|   |           |           |           |
|---|-----------|-----------|-----------|
| C | -1.870802 | 1.553999  | -0.394384 |
| H | -1.032880 | 1.364032  | -1.070330 |
| H | -2.744821 | 1.764159  | -1.017384 |
| C | -1.563755 | 2.732970  | 0.517709  |
| H | -0.693504 | 2.533615  | 1.146040  |
| H | -1.346343 | 3.614010  | -0.089227 |
| H | -2.411728 | 2.968572  | 1.164146  |
| F | -2.607955 | -2.061768 | 0.112783  |
| F | -1.523010 | -1.110883 | -1.491819 |
| F | -3.629649 | -0.700571 | -1.216881 |
| O | -2.992855 | 0.309361  | 1.436488  |
| O | -1.246364 | -0.088199 | 1.360883  |

1 imaginary frequency:  $-1000.84 \text{ cm}^{-1}$

-----

#### **S4-TS1C3cis**

**Charge: 0**

|   |          |           |           |
|---|----------|-----------|-----------|
| C | 4.105606 | 0.740434  | 0.171431  |
| C | 3.890250 | -0.537899 | -0.613714 |
| C | 2.639181 | -1.352788 | -0.411936 |
| C | 3.972401 | -1.890074 | 0.046843  |
| H | 4.154314 | -1.905318 | 1.117024  |
| H | 4.412276 | -2.714432 | -0.502885 |
| C | 1.589747 | -0.895685 | 0.583964  |
| C | 0.980150 | 0.422625  | 0.135260  |
| C | 1.730673 | 1.689974  | 0.497119  |
| C | 3.100530 | 1.840833  | -0.185821 |
| H | 3.503970 | 2.812754  | 0.115949  |
| H | 2.969245 | 1.879170  | -1.273699 |
| H | 1.111763 | 2.553482  | 0.234646  |
| H | 1.878331 | 1.714056  | 1.583010  |
| H | 0.682385 | 0.398877  | -0.917957 |
| H | 2.025100 | -0.773500 | 1.580091  |

|   |           |           |           |
|---|-----------|-----------|-----------|
| H | 0.813406  | -1.661686 | 0.664641  |
| H | 2.226175  | -1.801639 | -1.310088 |
| H | 4.244182  | -0.491008 | -1.639601 |
| H | 4.051263  | 0.538354  | 1.246996  |
| H | 5.121662  | 1.099537  | -0.022146 |
| H | -0.045547 | 0.514435  | 0.692404  |
| C | -2.417533 | -1.135626 | -0.146399 |
| C | -2.341095 | 0.370442  | 0.196867  |
| C | -2.342681 | 1.260821  | -1.026593 |
| H | -1.554289 | 0.913506  | -1.699411 |
| H | -3.295820 | 1.099775  | -1.538812 |
| C | -2.146199 | 2.732927  | -0.693947 |
| H | -1.169864 | 2.907354  | -0.236547 |
| H | -2.199334 | 3.322810  | -1.610961 |
| H | -2.918494 | 3.096713  | -0.012990 |
| F | -2.305138 | -1.904037 | 0.939511  |
| F | -1.452367 | -1.504531 | -1.001749 |
| F | -3.596540 | -1.419125 | -0.723005 |
| O | -3.172120 | 0.685938  | 1.235603  |
| O | -1.376693 | 0.622824  | 1.174282  |

1 imaginary frequency:  $-959.56 \text{ cm}^{-1}$

-----

#### **S4-TS1C3trans**

**Charge: 0**

|   |           |           |           |
|---|-----------|-----------|-----------|
| C | -3.655997 | -1.150036 | -0.401795 |
| C | -3.392905 | 0.264440  | -0.873674 |
| C | -2.510560 | 1.178970  | -0.068215 |
| C | -3.988931 | 1.458877  | -0.172721 |
| H | -4.589956 | 1.262262  | 0.709921  |
| H | -4.315072 | 2.304138  | -0.767922 |
| C | -1.887995 | 0.698484  | 1.225779  |
| C | -0.916163 | -0.457895 | 1.048627  |

|   |           |           |           |
|---|-----------|-----------|-----------|
| C | -1.479597 | -1.842474 | 0.787869  |
| C | -2.393706 | -2.020796 | -0.426611 |
| H | -2.680669 | -3.076325 | -0.468005 |
| H | -1.828997 | -1.816286 | -1.344455 |
| H | -0.643576 | -2.545195 | 0.716510  |
| H | -2.038665 | -2.121140 | 1.693380  |
| H | -0.180897 | -0.490647 | 1.855936  |
| H | -0.263359 | -0.185853 | 0.110897  |
| H | -2.667264 | 0.366145  | 1.923015  |
| H | -1.371444 | 1.533055  | 1.708722  |
| H | -1.862945 | 1.827985  | -0.649836 |
| H | -3.281973 | 0.355797  | -1.950535 |
| H | -4.069418 | -1.140937 | 0.613132  |
| H | -4.423520 | -1.596547 | -1.042247 |
| C | 2.677522  | -0.742145 | 0.017048  |
| C | 1.903608  | 0.539375  | -0.371595 |
| C | 1.962054  | 1.618465  | 0.688280  |
| H | 1.557934  | 1.198419  | 1.613436  |
| H | 3.017023  | 1.841324  | 0.871660  |
| C | 1.204874  | 2.879959  | 0.298365  |
| H | 0.147160  | 2.672143  | 0.124636  |
| H | 1.276987  | 3.610565  | 1.106284  |
| H | 1.621029  | 3.332126  | -0.604174 |
| F | 2.514367  | -1.717486 | -0.880248 |
| F | 2.287462  | -1.222650 | 1.207266  |
| F | 3.992489  | -0.483480 | 0.097762  |
| O | 2.142519  | 0.882161  | -1.673732 |
| O | 0.646923  | 0.234111  | -0.895208 |

1 imaginary frequency:  $-930.83 \text{ cm}^{-1}$

-----

**S4**

**Charge: 0**

|   |           |           |           |
|---|-----------|-----------|-----------|
| C | -0.116135 | -1.512707 | 0.347868  |
| C | -1.181094 | -0.752511 | -0.415181 |
| C | -1.181095 | 0.752488  | -0.415183 |
| C | -2.279803 | -0.000010 | 0.294476  |
| H | -2.254251 | -0.000014 | 1.380209  |
| H | -3.274659 | 0.000003  | -0.136752 |
| C | -0.116158 | 1.512684  | 0.347869  |
| C | 1.289928  | 1.306435  | -0.230699 |
| C | 1.966780  | 0.000030  | 0.198271  |
| C | 1.289986  | -1.306418 | -0.230663 |
| H | 1.932048  | -2.135740 | 0.086033  |
| H | 1.240126  | -1.355573 | -1.326069 |
| H | 2.992197  | 0.000064  | -0.188552 |
| H | 2.052066  | 0.000041  | 1.293243  |
| H | 1.931993  | 2.135794  | 0.085898  |
| H | 1.239983  | 1.355543  | -1.326106 |
| H | -0.118889 | 1.212035  | 1.401734  |
| H | -0.368108 | 2.578546  | 0.333272  |
| H | -1.460014 | 1.212834  | -1.359123 |
| H | -1.460020 | -1.212832 | -1.359126 |
| H | -0.118893 | -1.212078 | 1.401782  |
| H | -0.368027 | -2.578575 | 0.333012  |

There are no imaginary frequencies

-----

#### **S5-TS1C2cis**

**Charge: 0**

|   |           |           |           |
|---|-----------|-----------|-----------|
| C | -2.782787 | 1.556067  | -0.576485 |
| C | -2.881784 | 1.400630  | 0.953866  |
| H | -3.636049 | 0.644282  | 1.195906  |
| H | -3.246840 | 2.336969  | 1.386293  |
| C | -1.573453 | 1.063135  | 1.668390  |
| C | -0.898317 | -0.230071 | 1.257274  |



|   |           |           |           |
|---|-----------|-----------|-----------|
| C | -1.792211 | -1.420359 | 1.099875  |
| C | -1.426983 | -2.610052 | 0.255684  |
| C | -2.584756 | -1.725343 | -0.144788 |
| C | -2.508122 | -0.898681 | -1.410613 |
| C | -3.333474 | 0.391294  | -1.409264 |
| H | -3.415252 | 0.732930  | -2.447031 |
| H | -4.356860 | 0.168694  | -1.080071 |
| H | -2.860465 | -1.533310 | -2.232139 |
| H | -1.466880 | -0.660867 | -1.643299 |
| H | -3.572733 | -2.134375 | 0.049034  |
| H | -0.523494 | -2.526552 | -0.340682 |
| H | -1.629364 | -3.601372 | 0.644095  |
| H | -2.309148 | -1.645048 | 2.032096  |
| H | -0.042921 | -0.448780 | 1.901155  |
| H | -0.358784 | -0.033589 | 0.222337  |
| H | -0.860767 | 1.887297  | 1.558157  |
| H | -1.770625 | 0.980582  | 2.746181  |
| H | -1.740876 | 1.743264  | -0.863536 |
| H | -3.338685 | 2.452299  | -0.868748 |
| C | 2.616073  | -0.746563 | 0.056498  |
| C | 1.856728  | 0.517790  | -0.411597 |
| C | 2.017087  | 1.696156  | 0.525176  |
| H | 1.573717  | 1.415212  | 1.484974  |
| H | 3.086798  | 1.845036  | 0.697510  |
| C | 1.375957  | 2.968582  | -0.011256 |
| H | 0.313524  | 2.822364  | -0.219547 |
| H | 1.468287  | 3.763827  | 0.731006  |
| H | 1.863757  | 3.303559  | -0.928789 |
| F | 2.306572  | -1.817405 | -0.678846 |
| F | 2.362120  | -1.050964 | 1.337554  |
| F | 3.940933  | -0.551946 | -0.052887 |
| O | 2.045819  | 0.719000  | -1.752473 |
| O | 0.558342  | 0.217863  | -0.821758 |

1 imaginary frequency:  $-941.43 \text{ cm}^{-1}$

-----  
**S5-TS1C2trans**

**Charge: 0**

|   |           |           |           |
|---|-----------|-----------|-----------|
| C | 3.179155  | -1.752757 | -0.460728 |
| C | 2.829576  | -1.659497 | 1.037139  |
| H | 3.488013  | -0.929563 | 1.519926  |
| H | 3.035728  | -2.620453 | 1.518020  |
| C | 1.367476  | -1.307977 | 1.351662  |
| C | 0.912597  | -0.023438 | 0.685105  |
| C | 1.739983  | 1.177326  | 0.966280  |
| C | 1.645900  | 2.409421  | 0.100109  |
| C | 2.860677  | 1.536324  | -0.003503 |
| C | 3.132337  | 0.739342  | -1.261302 |
| C | 3.928790  | -0.554834 | -1.062089 |
| H | 4.308657  | -0.861868 | -2.042629 |
| H | 4.812356  | -0.342861 | -0.446211 |
| H | 3.697003  | 1.390140  | -1.938946 |
| H | 2.193113  | 0.514603  | -1.778094 |
| H | 3.756894  | 1.904580  | 0.488105  |
| H | 0.942518  | 2.369218  | -0.726124 |
| H | 1.729381  | 3.374800  | 0.585196  |
| H | 1.969987  | 1.339078  | 2.014890  |
| H | -0.157477 | 0.191060  | 1.100947  |
| H | 0.729441  | -0.153134 | -0.382739 |
| H | 0.715289  | -2.124730 | 1.025954  |
| H | 1.253873  | -1.216319 | 2.436971  |
| H | 2.268300  | -1.938800 | -1.043916 |
| H | 3.813229  | -2.632042 | -0.610443 |
| C | -2.429049 | -1.084942 | -0.453816 |
| C | -2.326968 | 0.327937  | 0.166969  |
| C | -2.020502 | 1.408427  | -0.846488 |
| H | -1.062470 | 1.161243  | -1.312789 |
| H | -2.782143 | 1.352913  | -1.629671 |

|   |           |           |           |
|---|-----------|-----------|-----------|
| C | -1.974172 | 2.801722  | -0.235813 |
| H | -1.225325 | 2.863700  | 0.556511  |
| H | -1.708613 | 3.527562  | -1.006891 |
| H | -2.942682 | 3.087819  | 0.179177  |
| F | -2.519387 | -2.036459 | 0.478345  |
| F | -1.371133 | -1.377615 | -1.224872 |
| F | -3.524769 | -1.169198 | -1.225659 |
| O | -3.324244 | 0.537748  | 1.078811  |
| O | -1.572290 | 0.323523  | 1.338849  |

1 imaginary frequency:  $-1033.08 \text{ cm}^{-1}$

-----

### S5-TS1C3cis

Charge: 0

|   |          |           |           |
|---|----------|-----------|-----------|
| C | 1.894554 | 1.814743  | -0.019932 |
| C | 1.276879 | 0.869974  | -1.065426 |
| H | 2.014583 | 0.652351  | -1.849090 |
| H | 0.449564 | 1.374203  | -1.573286 |
| C | 0.754324 | -0.454713 | -0.547169 |
| C | 1.678366 | -1.311460 | 0.299592  |
| C | 2.988831 | -1.554490 | -0.418215 |
| C | 4.216877 | -1.993255 | 0.337302  |
| C | 4.150997 | -0.608050 | -0.258761 |
| C | 4.103488 | 0.600972  | 0.652260  |
| C | 3.426090 | 1.839516  | 0.058352  |
| H | 3.710667 | 2.702242  | 0.670518  |
| H | 3.831550 | 2.029149  | -0.943918 |
| H | 5.136960 | 0.860965  | 0.909045  |
| H | 3.617463 | 0.342267  | 1.599319  |
| H | 4.739597 | -0.453042 | -1.159209 |
| H | 4.132811 | -2.062084 | 1.417894  |
| H | 4.864649 | -2.733955 | -0.117503 |
| H | 2.873423 | -1.980336 | -1.411315 |

|   |           |           |           |
|---|-----------|-----------|-----------|
| H | 1.185421  | -2.263870 | 0.515872  |
| H | 1.865314  | -0.826357 | 1.261216  |
| H | 0.278662  | -1.030917 | -1.345568 |
| H | 1.484060  | 1.586177  | 0.971481  |
| H | 1.566066  | 2.832413  | -0.251476 |
| H | -0.146645 | -0.199509 | 0.158211  |
| C | -3.036140 | -0.946581 | -0.142308 |
| C | -2.412529 | 0.373409  | 0.367245  |
| C | -2.422011 | 1.474595  | -0.669319 |
| H | -1.858435 | 1.116848  | -1.535571 |
| H | -3.457042 | 1.611593  | -0.995539 |
| C | -1.841520 | 2.783722  | -0.154268 |
| H | -0.813858 | 2.656007  | 0.191170  |
| H | -1.837659 | 3.521163  | -0.959266 |
| H | -2.435237 | 3.185279  | 0.669440  |
| F | -2.894344 | -1.941649 | 0.736640  |
| F | -2.485472 | -1.348470 | -1.297522 |
| F | -4.351618 | -0.783309 | -0.357958 |
| O | -2.825956 | 0.658218  | 1.637860  |
| O | -1.210073 | 0.143031  | 1.038517  |

1 imaginary frequency:  $-966.30 \text{ cm}^{-1}$

-----

### S5-TS1C3trans

**Charge: 0**

|   |          |           |           |
|---|----------|-----------|-----------|
| C | 2.504259 | 2.080158  | -0.503465 |
| C | 1.070750 | 1.543781  | -0.280657 |
| H | 0.865104 | 0.751814  | -1.005321 |
| H | 0.352649 | 2.344122  | -0.476843 |
| C | 0.821488 | 1.039389  | 1.127489  |
| C | 1.679037 | -0.095300 | 1.653120  |
| C | 1.823948 | -1.230298 | 0.671579  |
| C | 2.974713 | -2.198294 | 0.759554  |

|   |           |           |           |
|---|-----------|-----------|-----------|
| C | 2.900214  | -1.217008 | -0.384461 |
| C | 3.925304  | -0.106899 | -0.492218 |
| C | 3.460524  | 1.141712  | -1.247820 |
| H | 4.350070  | 1.723531  | -1.513610 |
| H | 2.997907  | 0.840167  | -2.196381 |
| H | 4.801898  | -0.516116 | -1.007743 |
| H | 4.274653  | 0.182856  | 0.504966  |
| H | 2.603336  | -1.632041 | -1.344204 |
| H | 3.726006  | -2.004818 | 1.519761  |
| H | 2.782685  | -3.247487 | 0.566317  |
| H | 0.877210  | -1.660120 | 0.358456  |
| H | 1.252478  | -0.457005 | 2.594577  |
| H | 2.663107  | 0.314407  | 1.909716  |
| H | 0.759508  | 1.860383  | 1.847889  |
| H | 2.949532  | 2.365874  | 0.457155  |
| H | 2.428519  | 3.002580  | -1.086689 |
| H | -0.281151 | 0.635334  | 1.139018  |
| C | -2.077152 | -1.120672 | -0.621941 |
| C | -2.398833 | 0.137345  | 0.217750  |
| C | -2.523918 | 1.394062  | -0.615637 |
| H | -1.663958 | 1.449035  | -1.287405 |
| H | -3.412101 | 1.269858  | -1.242288 |
| C | -2.624337 | 2.659271  | 0.223881  |
| H | -1.710129 | 2.825437  | 0.798028  |
| H | -2.773206 | 3.519481  | -0.431570 |
| H | -3.466282 | 2.613817  | 0.918103  |
| F | -1.887301 | -2.199757 | 0.140934  |
| F | -0.979536 | -0.961474 | -1.374752 |
| F | -3.098290 | -1.388258 | -1.453249 |
| O | -3.371327 | -0.128897 | 1.141015  |
| O | -1.617133 | 0.203999  | 1.373813  |

1 imaginary frequency:  $-978.83 \text{ cm}^{-1}$

---

**Charge: 0**

|   |           |           |           |
|---|-----------|-----------|-----------|
| C | 1.912704  | 0.630191  | -0.261988 |
| C | 1.722515  | -0.629600 | 0.605287  |
| H | 1.182742  | -0.359121 | 1.519602  |
| H | 2.702956  | -0.990390 | 0.932667  |
| C | 1.010748  | -1.800918 | -0.079932 |
| C | -0.376644 | -1.480413 | -0.643419 |
| C | -1.271548 | -0.810456 | 0.371789  |
| C | -2.500319 | -0.043800 | -0.046315 |
| C | -1.306087 | 0.690740  | 0.513242  |
| C | -0.500742 | 1.613921  | -0.377691 |
| C | 0.964373  | 1.801107  | 0.028645  |
| H | 1.347769  | 2.681354  | -0.499638 |
| H | 1.014561  | 2.042401  | 1.098653  |
| H | -0.991135 | 2.594632  | -0.367928 |
| H | -0.545222 | 1.269085  | -1.416598 |
| H | -1.411638 | 1.053118  | 1.532777  |
| H | -2.679194 | 0.057499  | -1.113102 |
| H | -3.396600 | -0.127963 | 0.557992  |
| H | -1.362697 | -1.358311 | 1.306937  |
| H | -0.842626 | -2.410206 | -0.989461 |
| H | -0.281475 | -0.843188 | -1.527858 |
| H | 1.642929  | -2.177971 | -0.892709 |
| H | 0.918826  | -2.619451 | 0.644338  |
| H | 1.837725  | 0.363601  | -1.324146 |
| H | 2.933073  | 1.000283  | -0.119230 |

There are no imaginary frequencies

-----

**S7-Int1C4**

**Charge: 0**

|   |           |          |          |
|---|-----------|----------|----------|
| C | -2.468706 | 1.949323 | 0.359217 |
|---|-----------|----------|----------|

|   |           |           |           |
|---|-----------|-----------|-----------|
| C | -2.209955 | 1.399404  | -1.042087 |
| C | -1.829497 | -0.018720 | -1.095083 |
| C | -1.920278 | -0.872284 | -0.012098 |
| C | -2.287615 | -0.348248 | 1.355296  |
| C | -3.147155 | 0.909731  | 1.250025  |
| H | -1.541126 | -0.423663 | -2.059776 |
| H | -3.110434 | 1.462216  | -1.673948 |
| H | -1.456007 | 1.969694  | -1.594970 |
| H | -1.518267 | 2.245323  | 0.811945  |
| H | -2.799606 | -1.133447 | 1.916168  |
| H | -1.357614 | -0.127319 | 1.889300  |
| H | -4.125807 | 0.645912  | 0.832435  |
| H | -3.319349 | 1.322383  | 2.246261  |
| H | 1.427563  | -0.121812 | -2.176575 |
| C | -2.857442 | -2.079499 | -0.649413 |
| C | -1.501556 | -2.330984 | -0.195598 |
| H | -3.078476 | -2.047999 | -1.707449 |
| H | -3.699656 | -2.220740 | 0.016758  |
| H | -0.740808 | -2.514506 | -0.943896 |
| H | -1.365913 | -2.828959 | 0.756889  |
| C | 2.262958  | -0.867434 | 0.296015  |
| C | 2.002501  | 0.496656  | -0.418944 |
| C | 1.347847  | 1.455839  | 0.595098  |
| H | 0.391608  | 1.035386  | 0.919505  |
| H | 1.993400  | 1.508158  | 1.477386  |
| C | 1.137431  | 2.854557  | 0.031617  |
| H | 0.506292  | 2.837057  | -0.860714 |
| H | 0.649903  | 3.492585  | 0.773400  |
| H | 2.088219  | 3.321849  | -0.236543 |
| F | 2.654184  | -1.824003 | -0.572915 |
| F | 1.186286  | -1.365996 | 0.943341  |
| F | 3.241831  | -0.774090 | 1.222009  |
| O | 3.127946  | 0.921689  | -0.987757 |
| O | 0.964873  | 0.194491  | -1.393518 |
| H | -3.080727 | 2.849968  | 0.281536  |

There are no imaginary frequencies

---

**S7-TS1C4ax**

**Charge: 0**

|   |           |           |           |
|---|-----------|-----------|-----------|
| C | -2.539391 | -1.988744 | -0.839632 |
| C | -1.848260 | -1.910487 | 0.522025  |
| C | -1.230771 | -0.543686 | 0.761921  |
| C | -2.154154 | 0.599412  | 0.488664  |
| C | -2.857608 | 0.514935  | -0.851059 |
| C | -3.537138 | -0.844497 | -1.028665 |
| H | -0.721434 | -0.460143 | 1.724325  |
| H | -2.584574 | -2.080454 | 1.319439  |
| H | -1.086952 | -2.688659 | 0.620636  |
| H | -1.779422 | -1.937549 | -1.629076 |
| H | -3.585021 | 1.327355  | -0.938684 |
| H | -2.116770 | 0.657540  | -1.648704 |
| H | -4.344535 | -0.941859 | -0.292181 |
| H | -3.997548 | -0.906204 | -2.019001 |
| H | -0.365320 | -0.456348 | -0.022665 |
| C | -2.944887 | 1.113699  | 1.680468  |
| C | -1.846809 | 1.946878  | 1.078213  |
| H | -2.763676 | 0.653605  | 2.645145  |
| H | -3.973416 | 1.400970  | 1.491010  |
| H | -0.929326 | 2.051293  | 1.646504  |
| H | -2.127698 | 2.816203  | 0.494060  |
| H | -3.042680 | -2.954018 | -0.944219 |
| C | 2.608798  | -0.535232 | 0.491595  |
| C | 1.815778  | 0.254947  | -0.574240 |
| C | 1.619588  | 1.710447  | -0.215390 |
| H | 1.159700  | 1.751588  | 0.775019  |
| H | 2.612854  | 2.159724  | -0.125616 |
| C | 0.774431  | 2.467149  | -1.230018 |



|   |           |           |           |
|---|-----------|-----------|-----------|
| H | -0.221000 | 2.028977  | -1.323554 |
| H | 0.657432  | 3.502848  | -0.905123 |
| H | 1.245099  | 2.472763  | -2.215431 |
| F | 2.698209  | -1.833020 | 0.190973  |
| F | 2.044084  | -0.442355 | 1.704965  |
| F | 3.859269  | -0.056540 | 0.591771  |
| O | 2.228850  | -0.060180 | -1.838761 |
| O | 0.695247  | -0.454735 | -1.004309 |

1 imaginary frequency:  $-1009.76 \text{ cm}^{-1}$

---

### S7-TS1C4eq

**Charge: 0**

|   |          |           |           |
|---|----------|-----------|-----------|
| C | 3.236362 | 1.675463  | -0.692892 |
| C | 1.897463 | 1.588592  | 0.059744  |
| C | 1.254846 | 0.247236  | -0.219417 |
| C | 2.134691 | -0.922466 | 0.121952  |
| C | 3.467402 | -0.836456 | -0.610883 |
| C | 4.151407 | 0.503595  | -0.336418 |
| H | 0.294819 | 0.169516  | 0.452333  |
| H | 2.080726 | 1.689784  | 1.135216  |
| H | 1.234011 | 2.401384  | -0.246077 |
| H | 3.041336 | 1.669137  | -1.772123 |
| H | 4.103146 | -1.671621 | -0.301589 |
| H | 3.290477 | -0.943097 | -1.688602 |
| H | 4.417858 | 0.561098  | 0.725988  |
| H | 5.083557 | 0.569604  | -0.905476 |
| H | 0.855711 | 0.181285  | -1.236904 |
| C | 2.127977 | -1.451138 | 1.530265  |
| C | 1.525128 | -2.261444 | 0.401226  |
| H | 1.448235 | -0.996122 | 2.242394  |
| H | 3.072120 | -1.786162 | 1.945483  |
| H | 0.444436 | -2.343711 | 0.363356  |

|   |           |           |           |
|---|-----------|-----------|-----------|
| H | 2.065459  | -3.140082 | 0.065929  |
| H | 3.720527  | 2.627777  | -0.458789 |
| C | -2.366677 | -0.823860 | -0.537424 |
| C | -2.020311 | 0.402968  | 0.339088  |
| C | -1.997492 | 1.703499  | -0.435731 |
| H | -1.235632 | 1.610774  | -1.215081 |
| H | -2.961681 | 1.806179  | -0.941324 |
| C | -1.719723 | 2.913925  | 0.444636  |
| H | -0.766274 | 2.815702  | 0.967758  |
| H | -1.673625 | 3.811281  | -0.175375 |
| H | -2.508108 | 3.055657  | 1.186567  |
| F | -2.275604 | -1.968353 | 0.144303  |
| F | -1.559500 | -0.925486 | -1.603643 |
| F | -3.626049 | -0.725963 | -0.993424 |
| O | -2.698931 | 0.360475  | 1.527303  |
| O | -0.926466 | 0.145817  | 1.165987  |

1 imaginary frequency:  $-895.44 \text{ cm}^{-1}$

-----

### **S7-TS1C5ax**

**Charge: 0**

|   |           |           |           |
|---|-----------|-----------|-----------|
| C | -1.847452 | 2.102535  | 0.479557  |
| C | -1.018046 | 0.944920  | 0.996883  |
| C | -1.812676 | -0.312031 | 1.290785  |
| C | -2.707381 | -0.683433 | 0.125839  |
| C | -3.583041 | 0.461656  | -0.345070 |
| C | -2.736017 | 1.687555  | -0.694314 |
| H | -1.147392 | -1.139082 | 1.550915  |
| H | -0.289621 | 0.669841  | 0.117327  |
| H | -0.336399 | 1.225375  | 1.802962  |
| H | -2.476606 | 2.449545  | 1.311626  |
| H | -4.174004 | 0.147438  | -1.210758 |
| H | -4.290879 | 0.724217  | 0.452198  |

|   |           |           |           |
|---|-----------|-----------|-----------|
| H | -2.101711 | 1.452049  | -1.557345 |
| H | -3.378291 | 2.522643  | -0.987184 |
| H | -2.430857 | -0.105717 | 2.177129  |
| C | -2.142935 | -1.615794 | -0.913785 |
| C | -3.222956 | -2.088773 | 0.034615  |
| H | -1.138234 | -1.994743 | -0.763888 |
| H | -2.417230 | -1.443720 | -1.949195 |
| H | -2.937572 | -2.785870 | 0.815557  |
| H | -4.219831 | -2.235734 | -0.367417 |
| H | -1.198930 | 2.938451  | 0.204038  |
| C | 2.096690  | -1.147266 | 0.178911  |
| C | 1.957372  | 0.281734  | -0.394937 |
| C | 2.533616  | 1.346695  | 0.512737  |
| H | 2.132097  | 1.194549  | 1.518039  |
| H | 3.611652  | 1.169988  | 0.567342  |
| C | 2.238244  | 2.760082  | 0.031225  |
| H | 1.164972  | 2.962549  | 0.035852  |
| H | 2.721159  | 3.479338  | 0.695405  |
| H | 2.617584  | 2.925849  | -0.979363 |
| F | 1.541678  | -2.064694 | -0.616382 |
| F | 1.520433  | -1.259301 | 1.385207  |
| F | 3.393077  | -1.466803 | 0.321293  |
| O | 2.278446  | 0.317660  | -1.723771 |
| O | 0.679167  | 0.498956  | -0.908602 |

1 imaginary frequency:  $-949.11 \text{ cm}^{-1}$

-----

### S7-TS1C5eq

Charge: 0

|   |           |           |           |
|---|-----------|-----------|-----------|
| C | -1.248784 | -1.715751 | -0.445785 |
| C | -0.953603 | -0.249562 | -0.211924 |
| C | -2.028673 | 0.677808  | -0.741890 |
| C | -3.351915 | 0.297849  | -0.090661 |

|   |           |           |           |
|---|-----------|-----------|-----------|
| C | -3.712673 | -1.160973 | -0.292813 |
| C | -2.593078 | -2.074494 | 0.209533  |
| H | -1.784802 | 1.721846  | -0.529052 |
| H | -0.705891 | -0.035815 | 0.832291  |
| H | 0.033834  | 0.010698  | -0.783544 |
| H | -1.311810 | -1.907450 | -1.522992 |
| H | -4.649361 | -1.387909 | 0.225504  |
| H | -3.880319 | -1.345173 | -1.361878 |
| H | -2.501906 | -1.971760 | 1.297204  |
| H | -2.830280 | -3.121803 | 0.002096  |
| H | -2.113458 | 0.563435  | -1.828793 |
| C | -3.688406 | 0.936781  | 1.230414  |
| C | -4.439053 | 1.329447  | -0.023372 |
| H | -2.985279 | 1.653112  | 1.641960  |
| H | -4.211176 | 0.334103  | 1.965361  |
| H | -4.237823 | 2.307555  | -0.447060 |
| H | -5.463464 | 0.987539  | -0.126901 |
| H | -0.448282 | -2.339401 | -0.041430 |
| C | 2.710883  | -0.780770 | 0.337615  |
| C | 2.250329  | 0.566902  | -0.265047 |
| C | 1.940179  | 1.613589  | 0.783459  |
| F | 2.875235  | -1.718477 | -0.598627 |
| F | 1.831335  | -1.255979 | 1.231661  |
| F | 3.886098  | -0.629537 | 0.969290  |
| O | 3.030402  | 0.924768  | -1.330519 |
| O | 1.310027  | 0.374087  | -1.278185 |
| H | 1.259681  | 1.171991  | 1.515951  |
| H | 2.876882  | 1.830367  | 1.305303  |
| C | 1.338506  | 2.883312  | 0.198145  |
| H | 1.188859  | 3.615040  | 0.994324  |
| H | 1.995611  | 3.329489  | -0.551367 |
| H | 0.369283  | 2.684410  | -0.264299 |

1 imaginary frequency:  $-927.07 \text{ cm}^{-1}$

---

**S7-TS1C6ax****Charge: 0**

|   |           |           |           |
|---|-----------|-----------|-----------|
| C | 0.811118  | -0.702656 | -0.922862 |
| C | 1.539845  | 0.552934  | -1.354664 |
| C | 2.444461  | 1.094401  | -0.246524 |
| C | 3.354619  | 0.005941  | 0.287975  |
| C | 2.598477  | -1.212229 | 0.780952  |
| C | 1.695864  | -1.774496 | -0.318933 |
| H | 3.036021  | 1.935292  | -0.619979 |
| H | 2.151570  | 0.290468  | -2.229152 |
| H | 0.826055  | 1.312611  | -1.684453 |
| H | 0.085968  | -0.373246 | -0.057225 |
| H | 3.298059  | -1.980280 | 1.123225  |
| H | 1.981378  | -0.928910 | 1.643132  |
| H | 2.318008  | -2.178058 | -1.130144 |
| H | 1.088070  | -2.601597 | 0.056802  |
| H | 1.820979  | 1.475396  | 0.572456  |
| C | 4.669051  | -0.218526 | -0.412124 |
| C | 4.631184  | 0.395694  | 0.971393  |
| H | 4.918477  | 0.429664  | -1.245626 |
| H | 5.029637  | -1.237869 | -0.501784 |
| H | 4.856827  | 1.453286  | 1.059635  |
| H | 4.968179  | -0.214439 | 1.802881  |
| H | 0.128317  | -1.085864 | -1.683124 |
| C | -2.887322 | -0.722314 | -0.081159 |
| C | -2.045758 | 0.483374  | 0.398100  |
| C | -2.000436 | 1.615359  | -0.604306 |
| H | -1.555896 | 1.222030  | -1.523120 |
| H | -3.032090 | 1.891713  | -0.839493 |
| C | -1.219597 | 2.823133  | -0.106091 |
| H | -0.189003 | 2.558524  | 0.139366  |
| H | -1.194946 | 3.586494  | -0.886178 |
| H | -1.684433 | 3.260158  | 0.779988  |

|   |           |           |           |
|---|-----------|-----------|-----------|
| F | -2.817667 | -1.750971 | 0.767314  |
| F | -2.490628 | -1.165585 | -1.283613 |
| F | -4.179253 | -0.372302 | -0.186295 |
| O | -2.299482 | 0.772610  | 1.709154  |
| O | -0.827052 | 0.069973  | 0.940296  |

1 imaginary frequency:  $-957.23 \text{ cm}^{-1}$

-----

### S7-TS1C6eq

**Charge: 0**

|   |           |           |           |
|---|-----------|-----------|-----------|
| C | 0.880927  | -0.705663 | 0.706166  |
| C | 1.814188  | 0.092955  | 1.591755  |
| C | 3.263400  | -0.365795 | 1.356484  |
| C | 3.612485  | -0.287659 | -0.115629 |
| C | 2.660289  | -1.073561 | -0.993568 |
| C | 1.210471  | -0.608542 | -0.767824 |
| H | 3.946176  | 0.252953  | 1.946169  |
| H | 1.731680  | 1.156507  | 1.340117  |
| H | 1.543586  | -0.024457 | 2.643778  |
| H | 0.774056  | -1.743006 | 1.039764  |
| H | 2.923639  | -0.953424 | -2.048550 |
| H | 2.740531  | -2.141417 | -0.755555 |
| H | 1.120304  | 0.431708  | -1.098559 |
| H | 0.520835  | -1.211352 | -1.362363 |
| H | 3.376632  | -1.400214 | 1.703850  |
| C | 4.135957  | 1.021627  | -0.644434 |
| C | 5.053530  | -0.175416 | -0.518787 |
| H | 4.269573  | 1.836143  | 0.059624  |
| H | 3.833554  | 1.323388  | -1.641700 |
| H | 5.799760  | -0.158194 | 0.268521  |
| H | 5.364367  | -0.671078 | -1.432381 |
| H | -0.193053 | -0.271786 | 0.882851  |
| C | -2.957690 | -0.727054 | -0.231909 |

|   |           |           |           |
|---|-----------|-----------|-----------|
| C | -2.262506 | 0.590167  | 0.181149  |
| C | -1.733815 | 1.381091  | -0.995678 |
| H | -1.171293 | 0.702450  | -1.641860 |
| H | -2.603504 | 1.719454  | -1.566461 |
| C | -0.868515 | 2.561659  | -0.577972 |
| H | 0.026307  | 2.230059  | -0.046384 |
| H | -0.550211 | 3.111255  | -1.465904 |
| H | -1.418052 | 3.250845  | 0.066929  |
| F | -3.420411 | -1.402656 | 0.822830  |
| F | -2.121475 | -1.540844 | -0.893743 |
| F | -4.000102 | -0.474954 | -1.039478 |
| O | -2.977240 | 1.257037  | 1.136172  |
| O | -1.398926 | 0.380886  | 1.259216  |

1 imaginary frequency:  $-964.23 \text{ cm}^{-1}$

-----

#### S7-TS2'C4

**Charge: 0**

|   |           |           |           |
|---|-----------|-----------|-----------|
| C | -3.083646 | 1.558411  | 0.044222  |
| C | -3.333897 | 0.506289  | -1.037614 |
| C | -2.312121 | -0.620558 | -0.996433 |
| C | -1.326586 | -0.687785 | 0.085908  |
| C | -1.483766 | 0.107616  | 1.334816  |
| C | -2.793553 | 0.901556  | 1.389442  |
| H | -1.891105 | -0.881830 | -1.965511 |
| H | -4.328863 | 0.070497  | -0.904007 |
| H | -3.321276 | 0.969755  | -2.025489 |
| H | -2.228674 | 2.182954  | -0.240100 |
| H | -1.348576 | -0.544723 | 2.199467  |
| H | -0.645140 | 0.807595  | 1.336024  |
| H | -3.617406 | 0.232759  | 1.660022  |
| H | -2.710450 | 1.649667  | 2.179926  |
| H | 0.448135  | -0.198333 | -1.690425 |

|   |           |           |           |
|---|-----------|-----------|-----------|
| C | -2.602470 | -2.034480 | -0.301464 |
| C | -1.083265 | -2.134134 | 0.098513  |
| H | -2.905177 | -2.778855 | -1.032467 |
| H | -3.283872 | -1.974819 | 0.542760  |
| H | -0.523266 | -2.519090 | -0.749322 |
| H | -0.797319 | -2.579335 | 1.045660  |
| C | 2.291354  | -0.723738 | 0.244959  |
| C | 1.820913  | 0.559297  | -0.508445 |
| C | 1.799109  | 1.738710  | 0.482468  |
| H | 1.309579  | 1.447507  | 1.416443  |
| H | 2.842202  | 1.956840  | 0.728458  |
| C | 1.127831  | 2.980931  | -0.088390 |
| H | 0.058298  | 2.819386  | -0.245673 |
| H | 1.241711  | 3.821305  | 0.600945  |
| H | 1.573767  | 3.269536  | -1.043896 |
| F | 2.242643  | -1.817039 | -0.541329 |
| F | 1.561147  | -1.016542 | 1.343539  |
| F | 3.569007  | -0.608097 | 0.662985  |
| O | 2.540313  | 0.739630  | -1.602320 |
| O | 0.410267  | 0.272212  | -0.848674 |
| H | -3.951792 | 2.216845  | 0.120488  |

1 imaginary frequency:  $-185.86 \text{ cm}^{-1}$

-----

#### **S7-TS2C4**

**Charge: 0**

|   |           |           |           |
|---|-----------|-----------|-----------|
| C | -2.276504 | -2.077064 | -0.795352 |
| C | -1.598372 | -1.836740 | 0.550952  |
| C | -1.401911 | -0.415824 | 0.885857  |
| C | -2.138328 | 0.607059  | 0.298983  |
| C | -2.932062 | 0.344452  | -0.957445 |
| C | -3.428421 | -1.098477 | -1.018673 |
| H | -0.755419 | -0.176506 | 1.725753  |



|   |           |           |           |
|---|-----------|-----------|-----------|
| H | -2.222579 | -2.213868 | 1.377884  |
| H | -0.645462 | -2.359470 | 0.653104  |
| H | -1.536479 | -1.955177 | -1.592429 |
| H | -3.761325 | 1.053049  | -1.017041 |
| H | -2.268651 | 0.552330  | -1.805091 |
| H | -4.194823 | -1.249689 | -0.249733 |
| H | -3.899275 | -1.283767 | -1.986539 |
| H | 0.141938  | -0.042268 | -1.586718 |
| C | -2.948000 | 1.120511  | 1.625208  |
| C | -2.045880 | 2.001989  | 0.879487  |
| H | -2.652227 | 0.758540  | 2.601236  |
| H | -4.008480 | 1.093809  | 1.406143  |
| H | -1.113600 | 2.274024  | 1.358452  |
| H | -2.486935 | 2.752651  | 0.234965  |
| H | -2.632191 | -3.108332 | -0.838844 |
| C | 2.527048  | -0.588510 | 0.422980  |
| C | 1.822803  | 0.307397  | -0.639487 |
| C | 1.534522  | 1.686745  | -0.007155 |
| H | 0.970529  | 1.551055  | 0.920387  |
| H | 2.492464  | 2.144014  | 0.258580  |
| C | 0.772216  | 2.610329  | -0.949576 |
| H | -0.186649 | 2.179108  | -1.252584 |
| H | 0.561845  | 3.563784  | -0.458432 |
| H | 1.350287  | 2.819231  | -1.852997 |
| F | 2.760619  | -1.834206 | -0.031609 |
| F | 1.828240  | -0.732710 | 1.572773  |
| F | 3.726265  | -0.079631 | 0.773427  |
| O | 2.529369  | 0.342924  | -1.765091 |
| O | 0.556662  | -0.406022 | -0.797668 |

1 imaginary frequency:  $-47.57 \text{ cm}^{-1}$

-----

**S7**

**Charge: 0**

S81

|   |           |           |           |
|---|-----------|-----------|-----------|
| C | 2.105522  | 0.000010  | -0.037656 |
| C | 1.299593  | 1.264592  | 0.268084  |
| C | -0.034313 | 1.265685  | -0.482934 |
| C | -0.817844 | -0.000005 | -0.191549 |
| C | -0.034301 | -1.265695 | -0.482916 |
| C | 1.299614  | -1.264587 | 0.268087  |
| H | -0.627520 | 2.145320  | -0.212882 |
| H | 1.102774  | 1.314687  | 1.346648  |
| H | 1.879161  | 2.155816  | 0.008010  |
| H | 2.382579  | 0.000008  | -1.100127 |
| H | -0.627505 | -2.145330 | -0.212864 |
| H | 0.158867  | -1.326260 | -1.562495 |
| H | 1.102816  | -1.314699 | 1.346653  |
| H | 1.879188  | -2.155799 | 0.007989  |
| H | 0.158861  | 1.326252  | -1.562507 |
| C | -1.729141 | 0.000010  | 1.007615  |
| C | -2.304161 | -0.000012 | -0.393599 |
| H | -1.809967 | 0.914501  | 1.585948  |
| H | -1.809962 | -0.914468 | 1.585968  |
| H | -2.769169 | 0.914472  | -0.747278 |
| H | -2.769159 | -0.914512 | -0.747253 |
| H | 3.039221  | 0.000023  | 0.533401  |

There are no imaginary frequencies

-----

### **S8-Int1**

**Charge: 0**

|   |           |           |           |
|---|-----------|-----------|-----------|
| C | -2.024019 | -0.119788 | -0.085125 |
| C | -1.739540 | 0.639249  | 1.217167  |
| C | -0.698678 | 1.699007  | 1.075393  |
| C | -0.267671 | 2.179433  | -0.155158 |
| C | -0.827607 | 1.641229  | -1.438087 |

|   |           |           |           |
|---|-----------|-----------|-----------|
| C | -2.138067 | 0.886511  | -1.235403 |
| H | -0.159441 | 1.990293  | 1.969605  |
| H | -2.643481 | 1.120031  | 1.610591  |
| H | -1.390489 | -0.032632 | 2.003536  |
| H | -1.141848 | -0.741222 | -0.281621 |
| H | -0.940049 | 2.458074  | -2.154473 |
| H | -0.055680 | 0.973622  | -1.835752 |
| H | -2.933698 | 1.607834  | -1.018535 |
| H | -2.401456 | 0.389548  | -2.170222 |
| H | 1.772451  | -0.542344 | 2.099297  |
| C | -1.032028 | 3.527770  | 0.504980  |
| C | 0.362800  | 3.512752  | -0.074028 |
| H | -1.127909 | 3.807033  | 1.546355  |
| H | -1.891932 | 3.727518  | -0.122276 |
| H | 1.145184  | 3.658083  | 0.661950  |
| H | 0.514833  | 4.002695  | -1.027629 |
| C | 3.160389  | -0.001162 | -0.189984 |
| C | 2.325150  | -1.202651 | 0.355935  |
| C | 1.519689  | -1.805347 | -0.812881 |
| H | 0.872666  | -1.037166 | -1.246522 |
| H | 2.230367  | -2.104733 | -1.589199 |
| C | 0.685047  | -3.006185 | -0.388402 |
| H | -0.046707 | -2.733497 | 0.376535  |
| H | 0.136872  | -3.408846 | -1.244236 |
| H | 1.314318  | -3.804686 | 0.012719  |
| F | 3.788685  | 0.667783  | 0.799635  |
| F | 2.429987  | 0.921031  | -0.858145 |
| F | 4.123852  | -0.403179 | -1.046770 |
| O | 3.128328  | -2.045069 | 1.002389  |
| O | 1.348518  | -0.581740 | 1.235874  |
| C | -3.225064 | -1.099371 | 0.024757  |
| C | -4.567114 | -0.357408 | 0.043720  |
| H | -4.758413 | 0.156200  | -0.902568 |
| H | -5.383690 | -1.068279 | 0.205421  |
| H | -4.610795 | 0.383971  | 0.847877  |

|   |           |           |           |
|---|-----------|-----------|-----------|
| C | -3.197101 | -2.059719 | -1.172780 |
| H | -2.259805 | -2.625471 | -1.195122 |
| H | -4.021912 | -2.775774 | -1.101735 |
| H | -3.299610 | -1.534710 | -2.126174 |
| C | -3.101301 | -1.940170 | 1.303634  |
| H | -3.853542 | -2.735028 | 1.302102  |
| H | -2.114669 | -2.410310 | 1.374126  |
| H | -3.258360 | -1.341343 | 2.204935  |

There are no imaginary frequencies

-----

### **S8-Int1a**

**Charge: 0**

|   |           |           |           |
|---|-----------|-----------|-----------|
| C | 2.264029  | -0.367325 | 0.217040  |
| C | 1.462003  | -0.178020 | -1.083233 |
| C | 0.519800  | 0.983906  | -1.035158 |
| C | 0.917014  | 2.223243  | -0.360330 |
| C | 1.751251  | 2.015732  | 0.889330  |
| C | 2.852368  | 0.984125  | 0.647295  |
| H | -0.238964 | 1.052456  | -1.812210 |
| H | 2.164463  | -0.020048 | -1.919837 |
| H | 0.901006  | -1.082820 | -1.331638 |
| H | 1.544626  | -0.665638 | 0.993867  |
| H | 2.179875  | 2.969144  | 1.212631  |
| H | 1.099071  | 1.664742  | 1.699791  |
| H | 3.525095  | 1.358657  | -0.134205 |
| H | 3.448936  | 0.872861  | 1.555964  |
| H | -0.673538 | 0.026092  | 0.370888  |
| C | 1.276171  | 3.413938  | -1.262751 |
| C | 0.018567  | 3.428549  | -0.445250 |
| H | 1.186881  | 3.275230  | -2.333956 |
| H | 2.108156  | 4.031692  | -0.941503 |
| H | -0.926492 | 3.311478  | -0.964807 |

|   |           |           |           |
|---|-----------|-----------|-----------|
| H | -0.014188 | 4.075444  | 0.424711  |
| C | -3.121088 | -1.228525 | -0.539261 |
| C | -2.569234 | -0.346493 | 0.616970  |
| C | -2.840256 | 1.133838  | 0.375807  |
| H | -2.361261 | 1.426433  | -0.562814 |
| H | -3.918573 | 1.254038  | 0.243897  |
| C | -2.347315 | 2.008282  | 1.522462  |
| H | -1.267304 | 1.921232  | 1.661023  |
| H | -2.571875 | 3.054399  | 1.306587  |
| H | -2.839458 | 1.742434  | 2.460888  |
| F | -2.874248 | -2.525179 | -0.329012 |
| F | -2.542241 | -0.891877 | -1.699366 |
| F | -4.446422 | -1.088722 | -0.688646 |
| O | -3.164702 | -0.821493 | 1.796975  |
| O | -1.220745 | -0.669531 | 0.790448  |
| C | 3.307316  | -1.519838 | 0.144850  |
| C | 4.497528  | -1.168058 | -0.757176 |
| H | 5.174765  | -2.025213 | -0.832870 |
| H | 4.177728  | -0.909893 | -1.771288 |
| H | 5.072361  | -0.327497 | -0.358473 |
| C | 3.829635  | -1.822056 | 1.557213  |
| H | 3.006265  | -2.086181 | 2.229575  |
| H | 4.525839  | -2.666555 | 1.530752  |
| H | 4.362015  | -0.971855 | 1.991418  |
| C | 2.641288  | -2.796826 | -0.388340 |
| H | 3.322646  | -3.647421 | -0.285328 |
| H | 1.727526  | -3.027676 | 0.170363  |
| H | 2.379713  | -2.712176 | -1.446401 |

There are no imaginary frequencies

-----

**S8-TS1ax**

**Charge: 0**

|   |           |           |           |
|---|-----------|-----------|-----------|
| C | 2.173547  | -0.182957 | 0.277718  |
| C | 1.273053  | -0.022858 | -0.955357 |
| C | 0.191093  | 1.017130  | -0.737791 |
| C | 0.670432  | 2.327121  | -0.208997 |
| C | 1.609583  | 2.191729  | 0.970033  |
| C | 2.730719  | 1.193807  | 0.672534  |
| H | -0.484181 | 1.121170  | -1.590497 |
| H | 1.871189  | 0.298467  | -1.818947 |
| H | 0.801113  | -0.967978 | -1.228710 |
| H | 1.523193  | -0.517498 | 1.100139  |
| H | 2.025082  | 3.170301  | 1.228209  |
| H | 1.037155  | 1.845189  | 1.840250  |
| H | 3.347071  | 1.586818  | -0.145053 |
| H | 3.377363  | 1.111592  | 1.549156  |
| H | -0.493284 | 0.582310  | 0.104374  |
| C | 0.940033  | 3.410039  | -1.237980 |
| C | -0.238342 | 3.519510  | -0.307559 |
| H | 0.747236  | 3.179797  | -2.279593 |
| H | 1.797879  | 4.048376  | -1.056413 |
| H | -1.227121 | 3.362368  | -0.725615 |
| H | -0.187040 | 4.248017  | 0.494280  |
| C | -2.420786 | -1.642333 | -0.419383 |
| C | -2.588782 | -0.391867 | 0.474583  |
| C | -3.402827 | 0.706854  | -0.172186 |
| H | -2.889751 | 0.995147  | -1.093934 |
| H | -4.367654 | 0.280361  | -0.461319 |
| C | -3.594659 | 1.915254  | 0.733294  |
| H | -2.635713 | 2.342799  | 1.033557  |
| H | -4.154365 | 2.685096  | 0.198624  |
| H | -4.154388 | 1.653851  | 1.633565  |
| F | -1.542017 | -2.508996 | 0.090758  |
| F | -2.004273 | -1.327876 | -1.654653 |
| F | -3.595422 | -2.282007 | -0.541887 |
| O | -2.853165 | -0.741937 | 1.769476  |
| O | -1.384144 | -0.019603 | 1.065266  |

|   |          |           |           |
|---|----------|-----------|-----------|
| C | 3.257065 | -1.288368 | 0.121849  |
| C | 4.323316 | -0.909080 | -0.913769 |
| H | 5.036896 | -1.730835 | -1.034584 |
| H | 3.881972 | -0.708082 | -1.894649 |
| H | 4.887970 | -0.023971 | -0.607500 |
| C | 3.941987 | -1.527901 | 1.475476  |
| H | 3.207034 | -1.788898 | 2.244672  |
| H | 4.654574 | -2.355247 | 1.397157  |
| H | 4.495643 | -0.650678 | 1.819542  |
| C | 2.596836 | -2.608169 | -0.305607 |
| H | 3.320235 | -3.427465 | -0.245213 |
| H | 1.751584 | -2.855465 | 0.346308  |
| H | 2.230589 | -2.570772 | -1.334858 |

1 imaginary frequency:  $-1022.39 \text{ cm}^{-1}$

-----

### **S8-TS1eq**

**Charge: 0**

|   |           |           |           |
|---|-----------|-----------|-----------|
| C | -2.636649 | 0.019515  | -0.469975 |
| C | -1.312955 | -0.325420 | 0.248496  |
| C | -0.236286 | 0.656656  | -0.152713 |
| C | -0.589419 | 2.089959  | 0.113691  |
| C | -1.902275 | 2.447934  | -0.564835 |
| C | -3.010667 | 1.476455  | -0.157814 |
| H | 0.712751  | 0.406799  | 0.490183  |
| H | -1.461232 | -0.280109 | 1.332960  |
| H | -0.989456 | -1.336186 | -0.004294 |
| H | -2.437415 | -0.040840 | -1.550332 |
| H | -2.175439 | 3.475294  | -0.304869 |
| H | -1.764963 | 2.413223  | -1.652908 |
| H | -3.199466 | 1.585093  | 0.916687  |
| H | -3.932471 | 1.752875  | -0.675031 |
| H | 0.105124  | 0.499297  | -1.180906 |

|   |           |           |           |
|---|-----------|-----------|-----------|
| C | -0.295194 | 2.675054  | 1.467336  |
| C | 0.492153  | 3.115789  | 0.249963  |
| H | 0.209063  | 2.048584  | 2.195012  |
| H | -1.016879 | 3.370667  | 1.881410  |
| H | 1.520128  | 2.779205  | 0.167227  |
| H | 0.299227  | 4.107752  | -0.143983 |
| C | 3.450084  | -0.005500 | -0.683289 |
| C | 2.687865  | -0.832648 | 0.378270  |
| C | 2.043169  | -2.081553 | -0.184858 |
| H | 1.325590  | -1.765729 | -0.947687 |
| H | 2.820597  | -2.656749 | -0.695302 |
| C | 1.357789  | -2.928061 | 0.878746  |
| H | 0.596987  | -2.356617 | 1.414504  |
| H | 0.867117  | -3.780164 | 0.404315  |
| H | 2.076354  | -3.312697 | 1.605255  |
| F | 3.913070  | 1.143689  | -0.185242 |
| F | 2.675845  | 0.296053  | -1.736105 |
| F | 4.503932  | -0.699117 | -1.143134 |
| O | 3.412426  | -0.931702 | 1.534738  |
| O | 1.884118  | -0.015436 | 1.173692  |
| C | -3.771911 | -1.008172 | -0.188596 |
| C | -4.980735 | -0.686215 | -1.080279 |
| H | -5.750041 | -1.456132 | -0.963538 |
| H | -5.436544 | 0.273892  | -0.825892 |
| H | -4.691977 | -0.656706 | -2.136505 |
| C | -4.219399 | -0.990307 | 1.278552  |
| H | -4.994218 | -1.746892 | 1.440316  |
| H | -3.392294 | -1.215002 | 1.958341  |
| H | -4.639978 | -0.021680 | 1.562616  |
| C | -3.294590 | -2.424359 | -0.543583 |
| H | -4.135055 | -3.124400 | -0.504585 |
| H | -2.876153 | -2.457038 | -1.555556 |
| H | -2.533212 | -2.789033 | 0.150762  |

1 imaginary frequency:  $-904.89 \text{ cm}^{-1}$



-----  
**S8-TS2'**

**Charge: 0**

|   |           |           |           |
|---|-----------|-----------|-----------|
| C | -2.401217 | -0.095703 | 0.026411  |
| C | -2.219645 | 1.010874  | 1.076284  |
| C | -0.864376 | 1.694098  | 0.981100  |
| C | 0.058921  | 1.371117  | -0.105304 |
| C | -0.417363 | 0.676244  | -1.332423 |
| C | -1.928194 | 0.431448  | -1.332230 |
| H | -0.361162 | 1.816119  | 1.938453  |
| H | -2.998053 | 1.772407  | 0.962777  |
| H | -2.324289 | 0.599153  | 2.080148  |
| H | -1.729001 | -0.917970 | 0.309577  |
| H | -0.083011 | 1.227331  | -2.213726 |
| H | 0.103659  | -0.283090 | -1.346567 |
| H | -2.447834 | 1.366048  | -1.567462 |
| H | -2.153266 | -0.270380 | -2.136108 |
| H | 1.474795  | 0.209318  | 1.682340  |
| C | -0.624056 | 3.097598  | 0.241320  |
| C | 0.823335  | 2.621050  | -0.159130 |
| H | -0.622569 | 3.917757  | 0.953567  |
| H | -1.287811 | 3.272924  | -0.600529 |
| H | 1.493223  | 2.795694  | 0.678156  |
| H | 1.242064  | 2.904540  | -1.118807 |
| C | 3.429034  | 0.023544  | -0.214799 |
| C | 2.480489  | -0.990427 | 0.496451  |
| C | 2.027959  | -2.049453 | -0.526609 |
| H | 1.689824  | -1.571010 | -1.450267 |
| H | 2.915655  | -2.635297 | -0.781769 |
| C | 0.937202  | -2.966050 | 0.011149  |
| H | 0.005263  | -2.421064 | 0.181805  |
| H | 0.729997  | -3.765286 | -0.704920 |
| H | 1.237791  | -3.431708 | 0.953406  |

|   |           |           |           |
|---|-----------|-----------|-----------|
| F | 3.785112  | 1.038409  | 0.597273  |
| F | 2.896454  | 0.592429  | -1.318715 |
| F | 4.574051  | -0.569441 | -0.612228 |
| O | 3.045637  | -1.456600 | 1.595812  |
| O | 1.283974  | -0.184430 | 0.822414  |
| C | -3.831746 | -0.703238 | -0.000748 |
| C | -4.849788 | 0.260290  | -0.623805 |
| H | -4.633122 | 0.449845  | -1.678910 |
| H | -5.854883 | -0.169502 | -0.564515 |
| H | -4.870848 | 1.222365  | -0.102819 |
| C | -3.810644 | -2.004548 | -0.815960 |
| H | -3.105087 | -2.722731 | -0.384784 |
| H | -4.803147 | -2.466208 | -0.816521 |
| H | -3.527523 | -1.835958 | -1.858414 |
| C | -4.280643 | -1.051328 | 1.425364  |
| H | -5.217581 | -1.616306 | 1.395860  |
| H | -3.531805 | -1.667346 | 1.935005  |
| H | -4.454334 | -0.157060 | 2.029815  |

1 imaginary frequency:  $-186.40 \text{ cm}^{-1}$

---

## S8-TS2

**Charge: 0**

|   |           |           |           |
|---|-----------|-----------|-----------|
| C | 2.218698  | -0.178252 | 0.300230  |
| C | 1.296749  | -0.137144 | -0.923790 |
| C | 0.348237  | 0.986885  | -0.944447 |
| C | 0.535378  | 2.154946  | -0.214119 |
| C | 1.559477  | 2.184072  | 0.891599  |
| C | 2.722606  | 1.240148  | 0.597361  |
| H | -0.455486 | 0.953347  | -1.674900 |
| H | 1.871946  | -0.009708 | -1.856343 |
| H | 0.728510  | -1.057207 | -1.066481 |
| H | 1.595188  | -0.488209 | 1.148903  |

|   |           |           |           |
|---|-----------|-----------|-----------|
| H | 1.910181  | 3.208674  | 1.035210  |
| H | 1.052249  | 1.884461  | 1.815615  |
| H | 3.282723  | 1.623368  | -0.263220 |
| H | 3.402557  | 1.238425  | 1.450717  |
| H | -0.916238 | 0.213946  | 1.577448  |
| C | 0.705647  | 3.213844  | -1.444007 |
| C | -0.379600 | 3.334776  | -0.467179 |
| H | 0.481330  | 2.891041  | -2.452031 |
| H | 1.637340  | 3.749450  | -1.309112 |
| H | -1.382376 | 3.112957  | -0.810286 |
| H | -0.294761 | 4.100530  | 0.294461  |
| C | -2.600830 | -1.500426 | -0.488898 |
| C | -2.518260 | -0.455961 | 0.664440  |
| C | -3.150182 | 0.868888  | 0.182891  |
| H | -2.654619 | 1.196897  | -0.735812 |
| H | -4.198564 | 0.674825  | -0.063528 |
| C | -3.068232 | 1.965797  | 1.238013  |
| H | -2.033328 | 2.174301  | 1.525905  |
| H | -3.494451 | 2.895625  | 0.852892  |
| H | -3.621801 | 1.691228  | 2.139052  |
| F | -1.989315 | -2.658044 | -0.173535 |
| F | -2.047628 | -1.087437 | -1.652737 |
| F | -3.882289 | -1.810683 | -0.773239 |
| O | -3.042534 | -0.953279 | 1.779563  |
| O | -1.070309 | -0.271990 | 0.760698  |
| C | 3.339773  | -1.247528 | 0.176088  |
| C | 4.395943  | -0.856322 | -0.864895 |
| H | 5.130626  | -1.661051 | -0.969461 |
| H | 3.953784  | -0.685807 | -1.851520 |
| H | 4.935914  | 0.048611  | -0.572970 |
| C | 4.023470  | -1.421605 | 1.539493  |
| H | 3.296122  | -1.703553 | 2.308055  |
| H | 4.777775  | -2.212631 | 1.483477  |
| H | 4.528419  | -0.509349 | 1.867435  |
| C | 2.724473  | -2.598299 | -0.218350 |

|   |          |           |           |
|---|----------|-----------|-----------|
| H | 3.478756 | -3.388076 | -0.148881 |
| H | 1.895768 | -2.863264 | 0.447258  |
| H | 2.348193 | -2.594122 | -1.244953 |

1 imaginary frequency:  $-54.76 \text{ cm}^{-1}$

-----

**S8**

**Charge: 0**

|   |           |           |           |
|---|-----------|-----------|-----------|
| C | 0.716158  | 0.000218  | -0.411185 |
| C | -0.068141 | 1.253337  | 0.011156  |
| C | -1.486966 | 1.258364  | -0.563073 |
| C | -2.234112 | -0.000009 | -0.175991 |
| C | -1.486822 | -1.258173 | -0.563503 |
| C | -0.068177 | -1.252900 | 0.011080  |
| H | -2.032283 | 2.142730  | -0.217452 |
| H | -0.130741 | 1.293930  | 1.105717  |
| H | 0.449764  | 2.159490  | -0.312054 |
| H | 0.748906  | 0.000404  | -1.512180 |
| H | -2.032047 | -2.142718 | -0.218194 |
| H | -1.433574 | -1.320869 | -1.658773 |
| H | -0.131312 | -1.292992 | 1.105613  |
| H | 0.450074  | -2.159127 | -0.311442 |
| H | -1.433859 | 1.321413  | -1.658335 |
| C | -2.987907 | -0.000272 | 1.127353  |
| C | -3.733736 | -0.000056 | -0.191311 |
| H | -2.995918 | 0.914126  | 1.711501  |
| H | -2.995871 | -0.914877 | 1.711178  |
| H | -4.239692 | 0.914434  | -0.483471 |
| H | -4.239623 | -0.914480 | -0.483793 |
| C | 2.203622  | -0.000069 | 0.051641  |
| C | 2.336637  | -0.005290 | 1.580295  |
| H | 3.394651  | -0.002493 | 1.863205  |
| H | 1.872805  | 0.876732  | 2.031080  |

|   |          |           |           |
|---|----------|-----------|-----------|
| H | 1.879370 | -0.894064 | 2.024446  |
| C | 2.921674 | -1.236860 | -0.509669 |
| H | 2.793268 | -1.306299 | -1.595533 |
| H | 3.994891 | -1.177478 | -0.301677 |
| H | 2.553915 | -2.164978 | -0.065085 |
| C | 2.919810 | 1.241700  | -0.500983 |
| H | 3.993639 | 1.180615  | -0.296701 |
| H | 2.788141 | 1.320781  | -1.585804 |
| H | 2.553253 | 2.165783  | -0.047101 |

There are no imaginary frequencies

-----

**cis-P3-OH2**

**Charge: 0**

|   |           |           |           |
|---|-----------|-----------|-----------|
| C | 2.813586  | 1.683827  | -0.906701 |
| C | 1.751285  | 1.501432  | 0.172075  |
| C | 1.205525  | 0.083540  | 0.136884  |
| C | 2.268881  | -1.000308 | 0.135660  |
| C | 3.340021  | -0.957855 | 1.192339  |
| C | 3.686052  | -0.613421 | -0.237517 |
| C | 4.042320  | 0.820073  | -0.615416 |
| H | 4.696306  | 0.807489  | -1.491280 |
| H | 4.616287  | 1.281093  | 0.196484  |
| H | 4.229003  | -1.382219 | -0.778540 |
| H | 3.326173  | -0.138208 | 1.904150  |
| H | 3.683260  | -1.904528 | 1.595761  |
| C | 1.768132  | -2.357874 | -0.309627 |
| H | 2.574166  | -3.095956 | -0.289104 |
| H | 1.374583  | -2.311000 | -1.330525 |
| H | 0.968067  | -2.727557 | 0.341973  |
| H | 0.630432  | -0.031799 | -0.791892 |
| H | -0.069616 | -0.940015 | 1.228524  |
| H | 2.177717  | 1.709581  | 1.160804  |

|   |           |           |           |
|---|-----------|-----------|-----------|
| H | 0.919644  | 2.196611  | 0.025812  |
| H | 3.105492  | 2.734982  | -0.978719 |
| H | 2.386915  | 1.403437  | -1.877543 |
| C | -2.682168 | -0.880631 | -0.327248 |
| C | -2.554141 | 0.525734  | 0.330500  |
| C | -2.054899 | 1.625136  | -0.545577 |
| H | -1.090887 | 1.309990  | -0.957014 |
| H | -2.733405 | 1.673421  | -1.407115 |
| C | -1.948099 | 2.961435  | 0.166754  |
| H | -1.562361 | 3.714914  | -0.522125 |
| H | -2.921886 | 3.296222  | 0.530713  |
| H | -1.266642 | 2.896413  | 1.018047  |
| F | -1.681342 | -1.145823 | -1.175228 |
| F | -3.829540 | -0.947560 | -1.024444 |
| F | -2.707654 | -1.846859 | 0.590176  |
| O | -2.916380 | 0.632621  | 1.473735  |
| O | 0.304457  | -0.054775 | 1.245552  |

There are no imaginary frequencies

-----

**cis-P3-OH5**

**Charge: 0**

|   |           |           |           |
|---|-----------|-----------|-----------|
| C | 2.021279  | -2.006207 | -0.608895 |
| C | 3.128579  | -1.888938 | 0.433143  |
| C | 3.962789  | -0.635955 | 0.168632  |
| C | 3.135308  | 0.631441  | 0.031683  |
| C | 2.095955  | 0.922623  | 1.074660  |
| C | 1.666033  | 0.497233  | -0.313863 |
| C | 1.016212  | -0.857141 | -0.535885 |
| H | 0.468031  | -0.817151 | -1.483985 |
| H | -0.356886 | -1.928130 | 0.357913  |
| H | 1.260980  | 1.295012  | -0.927893 |
| H | 1.958057  | 0.211886  | 1.881677  |

|   |           |           |           |
|---|-----------|-----------|-----------|
| H | 1.926220  | 1.958132  | 1.350012  |
| C | 3.886738  | 1.803016  | -0.557372 |
| H | 3.251304  | 2.690897  | -0.619704 |
| H | 4.245969  | 1.569546  | -1.565387 |
| H | 4.757347  | 2.053835  | 0.058728  |
| H | 4.516943  | -0.781826 | -0.767603 |
| H | 4.710375  | -0.495080 | 0.957575  |
| H | 2.696494  | -1.861859 | 1.439505  |
| H | 3.774255  | -2.770326 | 0.395250  |
| H | 1.480451  | -2.953549 | -0.512466 |
| H | 2.471326  | -1.997917 | -1.608783 |
| C | -3.055320 | -0.562443 | -0.118414 |
| C | -2.292681 | 0.702817  | 0.370521  |
| C | -1.739662 | 1.587089  | -0.695644 |
| H | -1.040525 | 0.986726  | -1.287183 |
| H | -2.568380 | 1.817015  | -1.377451 |
| C | -1.088281 | 2.847859  | -0.155841 |
| H | -0.677533 | 3.432145  | -0.981151 |
| H | -1.812964 | 3.468518  | 0.375922  |
| H | -0.273677 | 2.606416  | 0.529944  |
| F | -2.519010 | -1.098606 | -1.220551 |
| F | -4.323249 | -0.221751 | -0.415245 |
| F | -3.100892 | -1.506211 | 0.820816  |
| O | -2.271232 | 0.912008  | 1.556175  |
| O | 0.056093  | -1.073700 | 0.514269  |

There are no imaginary frequencies

-----

**trans-P3-OH2**

**Charge: 0**

|   |          |           |           |
|---|----------|-----------|-----------|
| C | 2.810257 | -1.850145 | 0.692068  |
| C | 1.850421 | -1.648123 | -0.478593 |
| C | 1.189648 | -0.270953 | -0.415699 |

|   |           |           |           |
|---|-----------|-----------|-----------|
| C | 2.185156  | 0.871361  | -0.277920 |
| C | 3.370545  | 0.890082  | -1.204927 |
| C | 3.570955  | 0.558074  | 0.255916  |
| C | 3.978184  | -0.859693 | 0.647939  |
| H | 4.465180  | -0.834274 | 1.626448  |
| H | 4.729339  | -1.222882 | -0.062493 |
| H | 4.016960  | 1.347416  | 0.852898  |
| H | 3.493808  | 0.078651  | -1.914613 |
| H | 3.697277  | 1.859669  | -1.565360 |
| C | 1.573853  | 2.213209  | 0.062350  |
| H | 2.345413  | 2.986932  | 0.095748  |
| H | 1.070634  | 2.197061  | 1.032514  |
| H | 0.835723  | 2.504613  | -0.693221 |
| H | 0.588896  | -0.108685 | -1.315728 |
| H | 2.383465  | -1.760059 | -1.428483 |
| H | 1.057825  | -2.401214 | -0.468018 |
| H | 3.194490  | -2.873690 | 0.692409  |
| H | 2.261128  | -1.729028 | 1.633360  |
| H | 0.701236  | -0.156471 | 1.489535  |
| C | -2.620707 | -0.965426 | -0.237358 |
| C | -2.440317 | 0.430995  | 0.425156  |
| C | -2.132587 | 1.564027  | -0.495492 |
| H | -1.202975 | 1.318707  | -1.018367 |
| H | -2.912141 | 1.561591  | -1.268630 |
| C | -2.042471 | 2.905083  | 0.209960  |
| H | -1.795260 | 3.685440  | -0.511930 |
| H | -2.990501 | 3.166342  | 0.685462  |
| H | -1.265374 | 2.892304  | 0.977154  |
| F | -1.835027 | -1.148304 | -1.303013 |
| F | -3.896308 | -1.081570 | -0.657969 |
| F | -2.391462 | -1.956482 | 0.622481  |
| O | -2.648307 | 0.508303  | 1.609224  |
| O | 0.232360  | -0.241575 | 0.654202  |

There are no imaginary frequencies



-----  
**trans-P3-OH5**

**Charge: 0**

|   |           |           |           |
|---|-----------|-----------|-----------|
| C | 1.435078  | 1.442993  | -0.879046 |
| C | 2.595870  | 1.890736  | 0.045624  |
| C | 3.187833  | 0.786568  | 0.931863  |
| C | 3.336791  | -0.562191 | 0.247348  |
| C | 3.552824  | -0.612437 | -1.243850 |
| C | 2.202455  | -0.965572 | -0.657948 |
| C | 1.024587  | -0.025713 | -0.764923 |
| H | 0.418122  | -0.283266 | -1.636743 |
| H | 0.573048  | 0.009516  | 1.157374  |
| H | 1.934067  | -2.018066 | -0.664594 |
| H | 3.654086  | 0.314169  | -1.797336 |
| H | 4.146735  | -1.432413 | -1.632390 |
| C | 3.986060  | -1.626128 | 1.100015  |
| H | 4.018127  | -2.586595 | 0.578181  |
| H | 3.430975  | -1.766278 | 2.033977  |
| H | 5.013091  | -1.346687 | 1.359452  |
| H | 2.560381  | 0.640105  | 1.821689  |
| H | 4.163885  | 1.114943  | 1.306111  |
| H | 3.396485  | 2.300363  | -0.576139 |
| H | 2.264911  | 2.709231  | 0.689049  |
| H | 1.718149  | 1.616007  | -1.920833 |
| H | 0.545153  | 2.050401  | -0.701777 |
| C | -2.752956 | -1.030586 | -0.114014 |
| C | -2.501595 | 0.381524  | 0.488607  |
| C | -2.371743 | 1.504016  | -0.486523 |
| H | -1.592673 | 1.235505  | -1.205365 |
| H | -3.307335 | 1.523341  | -1.060774 |
| C | -2.092859 | 2.841644  | 0.175534  |
| H | -1.988560 | 3.615918  | -0.586570 |
| H | -2.904584 | 3.129489  | 0.847040  |

|   |           |           |           |
|---|-----------|-----------|-----------|
| H | -1.166512 | 2.805143  | 0.754217  |
| F | -2.136582 | -1.222890 | -1.284111 |
| F | -4.075712 | -1.175710 | -0.332447 |
| F | -2.377296 | -1.999872 | 0.718554  |
| O | -2.532060 | 0.479928  | 1.689100  |
| O | 0.133896  | -0.254140 | 0.343568  |

There are no imaginary frequencies

-----

### S8-Int1a-1

Charge: 0

Multiplicity: 2

|   |             |             |             |
|---|-------------|-------------|-------------|
| H | 1.42538200  | 1.47720600  | 1.06942100  |
| C | -1.09198100 | -0.17346400 | 0.03198800  |
| C | 0.37182000  | 0.30711200  | -0.06750800 |
| C | 1.35297000  | -0.84539400 | 0.12488500  |
| H | 1.16395900  | -1.31102100 | 1.09622100  |
| H | 1.13611500  | -1.58608700 | -0.65080200 |
| C | 2.80705600  | -0.38829700 | 0.01592000  |
| H | 3.10738200  | 0.25114800  | 0.85216900  |
| H | 3.46666900  | -1.25758900 | 0.03360400  |
| H | 2.98167400  | 0.15108800  | -0.91888500 |
| F | -1.95144600 | 0.84452200  | -0.05337600 |
| F | -1.30915400 | -0.79831300 | 1.19409800  |
| F | -1.37062100 | -1.03208300 | -0.96015500 |
| O | 0.47973800  | 0.89261300  | -1.33965100 |
| O | 0.49033900  | 1.32593300  | 0.87233300  |

There are no imaginary frequencies

-----

### S8-Int1a-2

Charge: -1

**Multiplicity: 1**

|   |             |             |             |
|---|-------------|-------------|-------------|
| H | -0.40867700 | 2.12114000  | -0.59976000 |
| C | 1.06097400  | -0.17470900 | -0.00297900 |
| C | -0.39805600 | 0.34507400  | 0.13708300  |
| C | -1.35255300 | -0.83630900 | -0.14716500 |
| H | -1.16402300 | -1.22983600 | -1.15273800 |
| H | -1.12026600 | -1.63485600 | 0.56735400  |
| C | -2.81231300 | -0.42171600 | -0.00856800 |
| H | -3.05943300 | 0.36625300  | -0.72582700 |
| H | -3.47896600 | -1.26987200 | -0.18994500 |
| H | -3.00682500 | -0.03831500 | 0.99610900  |
| F | 1.96919600  | 0.81767800  | 0.10704700  |
| F | 1.32006300  | -0.78757000 | -1.18512400 |
| F | 1.37147200  | -1.07993600 | 0.95410100  |
| O | -0.55152000 | 0.95617200  | 1.29515700  |
| O | -0.53556700 | 1.25131600  | -1.00136200 |

There are no imaginary frequencies

-----

**S8-Int1a-3****Charge: 0****Multiplicity: 2**

|   |             |             |             |
|---|-------------|-------------|-------------|
| C | 0.71414800  | 0.00661900  | -0.39758300 |
| C | -0.02659700 | 1.30580700  | -0.02601100 |
| C | -1.48250400 | 1.26755300  | -0.37745200 |
| C | -2.25383900 | 0.03094900  | -0.17093200 |
| C | -1.48464800 | -1.24137600 | -0.48289500 |
| C | -0.08637300 | -1.19217000 | 0.13574000  |
| H | -2.02829300 | 2.20766400  | -0.42221400 |
| H | 0.08333500  | 1.47431700  | 1.06238700  |
| H | 0.43869200  | 2.16908100  | -0.51177300 |

|   |             |             |             |
|---|-------------|-------------|-------------|
| H | 0.70525400  | -0.05872900 | -1.49875200 |
| H | -2.04111100 | -2.11118100 | -0.11522400 |
| H | -1.39531400 | -1.35157500 | -1.57275100 |
| H | -0.18678700 | -1.10625000 | 1.22710400  |
| H | 0.43804200  | -2.13210100 | -0.06521000 |
| C | -3.21878800 | -0.01021500 | 1.01374700  |
| C | -3.74039400 | 0.04518000  | -0.39442100 |
| H | -3.30481800 | 0.88395100  | 1.62252400  |
| H | -3.29842800 | -0.94862100 | 1.55534300  |
| H | -4.18981200 | 0.97452500  | -0.73165500 |
| H | -4.18813600 | -0.85523800 | -0.80471900 |
| C | 2.21208400  | -0.00661600 | 0.02379700  |
| C | 2.38316600  | -0.20788100 | 1.53635200  |
| H | 3.44184100  | -0.12031200 | 1.80527500  |
| H | 1.83109100  | 0.54340900  | 2.11145700  |
| H | 2.04114500  | -1.19855100 | 1.85208700  |
| C | 2.93734600  | -1.14517500 | -0.71036100 |
| H | 2.87271000  | -1.01066100 | -1.79627900 |
| H | 3.99759000  | -1.15770500 | -0.43431200 |
| H | 2.52120300  | -2.12627200 | -0.46316200 |
| C | 2.88871400  | 1.31231500  | -0.37895100 |
| H | 3.97212800  | 1.23596600  | -0.23612400 |
| H | 2.70201100  | 1.54471500  | -1.43444400 |
| H | 2.53376400  | 2.15362500  | 0.22425500  |

There are no imaginary frequencies

-----

**S8-Int1a-4**

**Charge: 1**

**Multiplicity: 1**

|   |             |             |             |
|---|-------------|-------------|-------------|
| C | -0.65697100 | 0.08792200  | -0.39233500 |
| C | 0.12708700  | -1.21803700 | -0.18496600 |
| C | 1.60918500  | -1.06765400 | -0.39617800 |

|   |             |             |             |
|---|-------------|-------------|-------------|
| C | 2.24025500  | 0.18150300  | -0.48764100 |
| C | 1.46412300  | 1.45689800  | -0.31629600 |
| C | 0.08526600  | 1.23411600  | 0.30552900  |
| H | 2.15126500  | -1.94779100 | -0.73080300 |
| H | -0.03194000 | -1.62732300 | 0.82141800  |
| H | -0.20564400 | -1.99198500 | -0.88140100 |
| H | -0.64462900 | 0.29656100  | -1.47364000 |
| H | 2.06042300  | 2.17343600  | 0.25525900  |
| H | 1.36728700  | 1.86496500  | -1.33059900 |
| H | 0.19898600  | 1.00867600  | 1.37359000  |
| H | -0.47642600 | 2.16872100  | 0.23964500  |
| C | 2.79118200  | -0.54803800 | 0.90925400  |
| C | 3.66930400  | 0.09689200  | -0.17197800 |
| H | 3.05162300  | -1.57467600 | 1.14031800  |
| H | 2.42097400  | 0.03584400  | 1.74447900  |
| H | 4.27765000  | -0.62869500 | -0.70147300 |
| H | 4.15428600  | 1.03626400  | 0.06703600  |
| C | -2.15262000 | -0.03231600 | 0.01259000  |
| C | -2.32910700 | -0.06705200 | 1.53694100  |
| H | -2.03483700 | 0.88024700  | 1.99952600  |
| H | -3.38200800 | -0.24194400 | 1.78157200  |
| H | -1.74630600 | -0.87019600 | 2.00111000  |
| C | -2.92656800 | 1.16846300  | -0.55184300 |
| H | -2.84324400 | 1.20844400  | -1.64361700 |
| H | -3.98785100 | 1.08109800  | -0.29691900 |
| H | -2.56964200 | 2.11942800  | -0.14584500 |
| C | -2.75507700 | -1.30909300 | -0.59297400 |
| H | -3.83934000 | -1.31588400 | -0.44216500 |
| H | -2.56387200 | -1.36274300 | -1.67136900 |
| H | -2.35310100 | -2.21407100 | -0.12673300 |

There are no imaginary frequencies

-----

**Charge: 1**

**Multiplicity: 1**

|   |             |             |             |
|---|-------------|-------------|-------------|
| C | -0.66103300 | 0.09419000  | -0.40127700 |
| C | 0.12830300  | -1.21123600 | -0.22271300 |
| C | 1.60540800  | -1.05989700 | -0.41459900 |
| C | 2.23769900  | 0.18181300  | -0.48825800 |
| C | 1.46312500  | 1.45420700  | -0.33339900 |
| C | 0.08817300  | 1.23695100  | 0.29155300  |
| H | 2.15444200  | -1.94309800 | -0.72232000 |
| H | -0.02940800 | -1.64377100 | 0.77175900  |
| H | -0.20040700 | -1.97055600 | -0.93499600 |
| H | -0.66586200 | 0.31480500  | -1.47760800 |
| H | 2.05765500  | 2.17316800  | 0.23391700  |
| H | 1.36549500  | 1.85252200  | -1.35030000 |
| H | 0.21410000  | 1.00771500  | 1.35532900  |
| H | -0.47173000 | 2.17077000  | 0.22832500  |
| C | 2.80089200  | -0.54880500 | 0.93080400  |
| C | 3.66625200  | 0.09078900  | -0.14777800 |
| H | 3.02346600  | -1.58377200 | 1.15579400  |
| H | 2.41514500  | 0.04455600  | 1.75011300  |
| H | 4.27433000  | -0.62952600 | -0.68304400 |
| H | 4.14623400  | 1.03303700  | 0.08491700  |
| C | -2.15195900 | -0.03333200 | 0.02049100  |
| C | -2.31043900 | -0.12516200 | 1.54348100  |
| H | -1.99266200 | 0.79621300  | 2.03923800  |
| H | -3.36203700 | -0.29139900 | 1.79768400  |
| H | -1.73480500 | -0.95445300 | 1.96600900  |
| C | -2.92712300 | 1.19046400  | -0.48792600 |
| H | -2.84565900 | 1.28008100  | -1.57626800 |
| H | -3.98804600 | 1.09471000  | -0.23666300 |
| H | -2.56766400 | 2.12170300  | -0.04237600 |
| C | -2.76978800 | -1.28282500 | -0.62327600 |
| H | -3.85046700 | -1.29655600 | -0.45170700 |
| H | -2.60031500 | -1.29339600 | -1.70544000 |

H -2.35885900 -2.20570000 -0.20497500

There are no imaginary frequencies

-----

**S8a**

**Charge: 0**

**Multiplicity: 1**

|   |             |             |             |
|---|-------------|-------------|-------------|
| C | 0.07129900  | 0.00152200  | -0.32564400 |
| C | -0.66724200 | 1.25374300  | 0.17349300  |
| C | -2.13935100 | 1.25559200  | -0.24506400 |
| C | -2.86302500 | -0.00173300 | 0.23203300  |
| C | -2.13723200 | -1.25636000 | -0.24912000 |
| C | -0.66733400 | -1.24976600 | 0.17572300  |
| H | -2.63513000 | 2.15109500  | 0.14340800  |
| H | -0.60940600 | 1.29851100  | 1.26866900  |
| H | -0.18785500 | 2.15928800  | -0.20637800 |
| H | -0.00814400 | 0.00254800  | -1.42416800 |
| H | -2.63197200 | -2.15393200 | 0.13586500  |
| H | -2.19486600 | -1.30775100 | -1.34430900 |
| H | -0.61806300 | -1.28486700 | 1.27147000  |
| H | -0.18254700 | -2.15770400 | -0.19193200 |
| H | -2.19970100 | 1.31032600  | -1.33997800 |
| C | 1.59829900  | -0.00067100 | -0.01689700 |
| C | 1.88676200  | -0.06814600 | 1.48875000  |
| H | 2.96727100  | -0.03510600 | 1.66431500  |
| H | 1.43946600  | 0.77361900  | 2.02544500  |
| H | 1.50936400  | -0.99343200 | 1.93318000  |
| C | 2.26286200  | -1.20523400 | -0.70079900 |
| H | 2.04826100  | -1.21361000 | -1.77513900 |
| H | 3.34961500  | -1.15882200 | -0.57620800 |
| H | 1.92663500  | -2.15657100 | -0.28101400 |
| C | 2.24765900  | 1.27035100  | -0.58539900 |
| H | 3.33780600  | 1.20303200  | -0.51024700 |

|   |             |             |             |
|---|-------------|-------------|-------------|
| H | 1.99140300  | 1.40465500  | -1.64219800 |
| H | 1.93803000  | 2.16852600  | -0.04514800 |
| H | -2.89587000 | -0.00400000 | 1.32945900  |
| H | -3.90047400 | -0.00159300 | -0.11754800 |

There are no imaginary frequencies

---

### S8a-Int1

**Charge: 1**

**Multiplicity: 1**

|   |             |             |             |
|---|-------------|-------------|-------------|
| C | 0.05590100  | -0.04586600 | -0.37552000 |
| C | -0.65417600 | 1.27621500  | -0.06558900 |
| C | -2.08895300 | 1.25926000  | -0.01305800 |
| C | -2.88539900 | 0.06990700  | 0.05036300  |
| C | -2.16882700 | -1.23711800 | -0.25528600 |
| C | -0.72969200 | -1.20311300 | 0.25508800  |
| H | -2.59890700 | 2.21711300  | 0.07396200  |
| H | -0.43612000 | 1.65148000  | 0.96243100  |
| H | -0.34391200 | 2.13564900  | -0.67290900 |
| H | 0.00723000  | -0.17004700 | -1.46480100 |
| H | -2.72155700 | -2.06132500 | 0.19795000  |
| H | -2.17739100 | -1.39718800 | -1.33737000 |
| H | -0.73829000 | -1.09487500 | 1.34570700  |
| H | -0.24716000 | -2.15486800 | 0.02935300  |
| C | 1.56724500  | -0.01275300 | -0.01137700 |
| C | 1.79438700  | -0.00228600 | 1.50527300  |
| H | 1.44583500  | -0.92670300 | 1.97326500  |
| H | 2.86365900  | 0.09386900  | 1.71773600  |
| H | 1.28874900  | 0.83729400  | 1.99345900  |
| C | 2.25274000  | -1.24896300 | -0.60980100 |
| H | 2.10587800  | -1.29103400 | -1.69408700 |
| H | 3.32911200  | -1.21049100 | -0.41658400 |
| H | 1.87474200  | -2.17919200 | -0.17827200 |



|   |             |            |             |
|---|-------------|------------|-------------|
| C | 2.22048900  | 1.23446700 | -0.62472000 |
| H | 3.30657400  | 1.18500800 | -0.50265200 |
| H | 2.00449400  | 1.30677300 | -1.69610000 |
| H | 1.88011900  | 2.15604700 | -0.14433800 |
| H | -3.17666700 | 0.13665400 | 1.12817800  |
| H | -3.84868700 | 0.22733500 | -0.44716300 |

There are no imaginary frequencies

---

### S5.3 Supplementary Figures of Computational Results

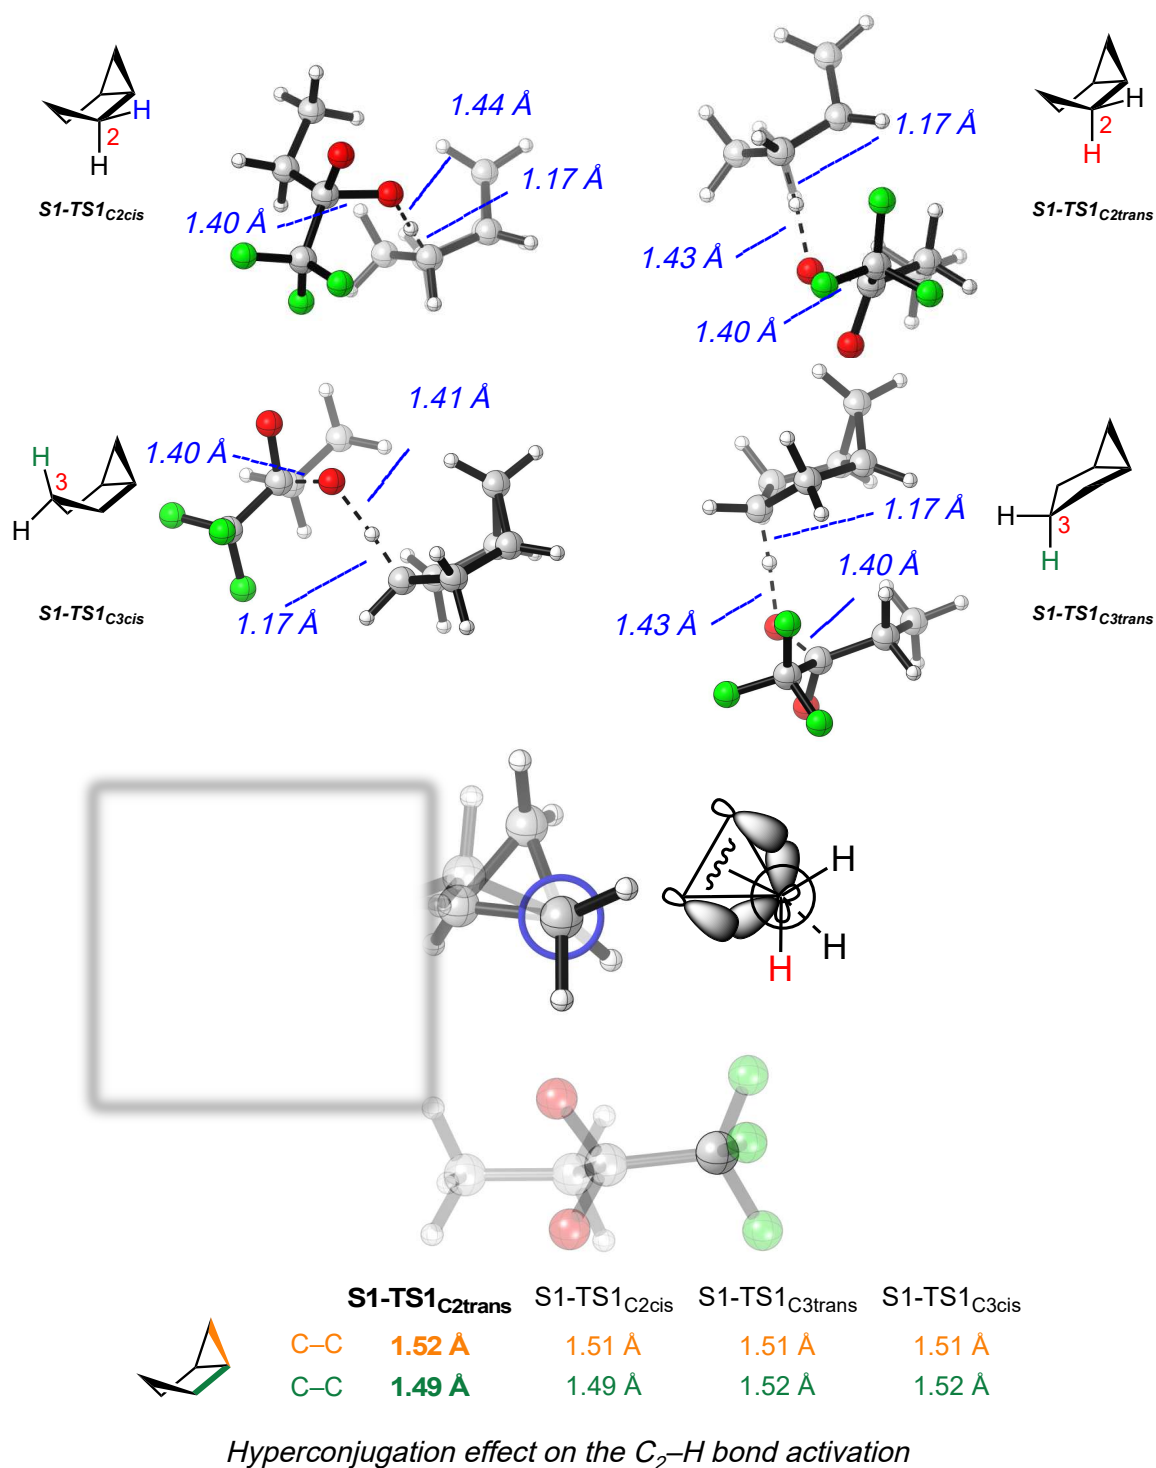

**Figure S7.** Transition state structures and structural analysis in C-H bond activation of bicyclo[3.1.0]hexane (S1).

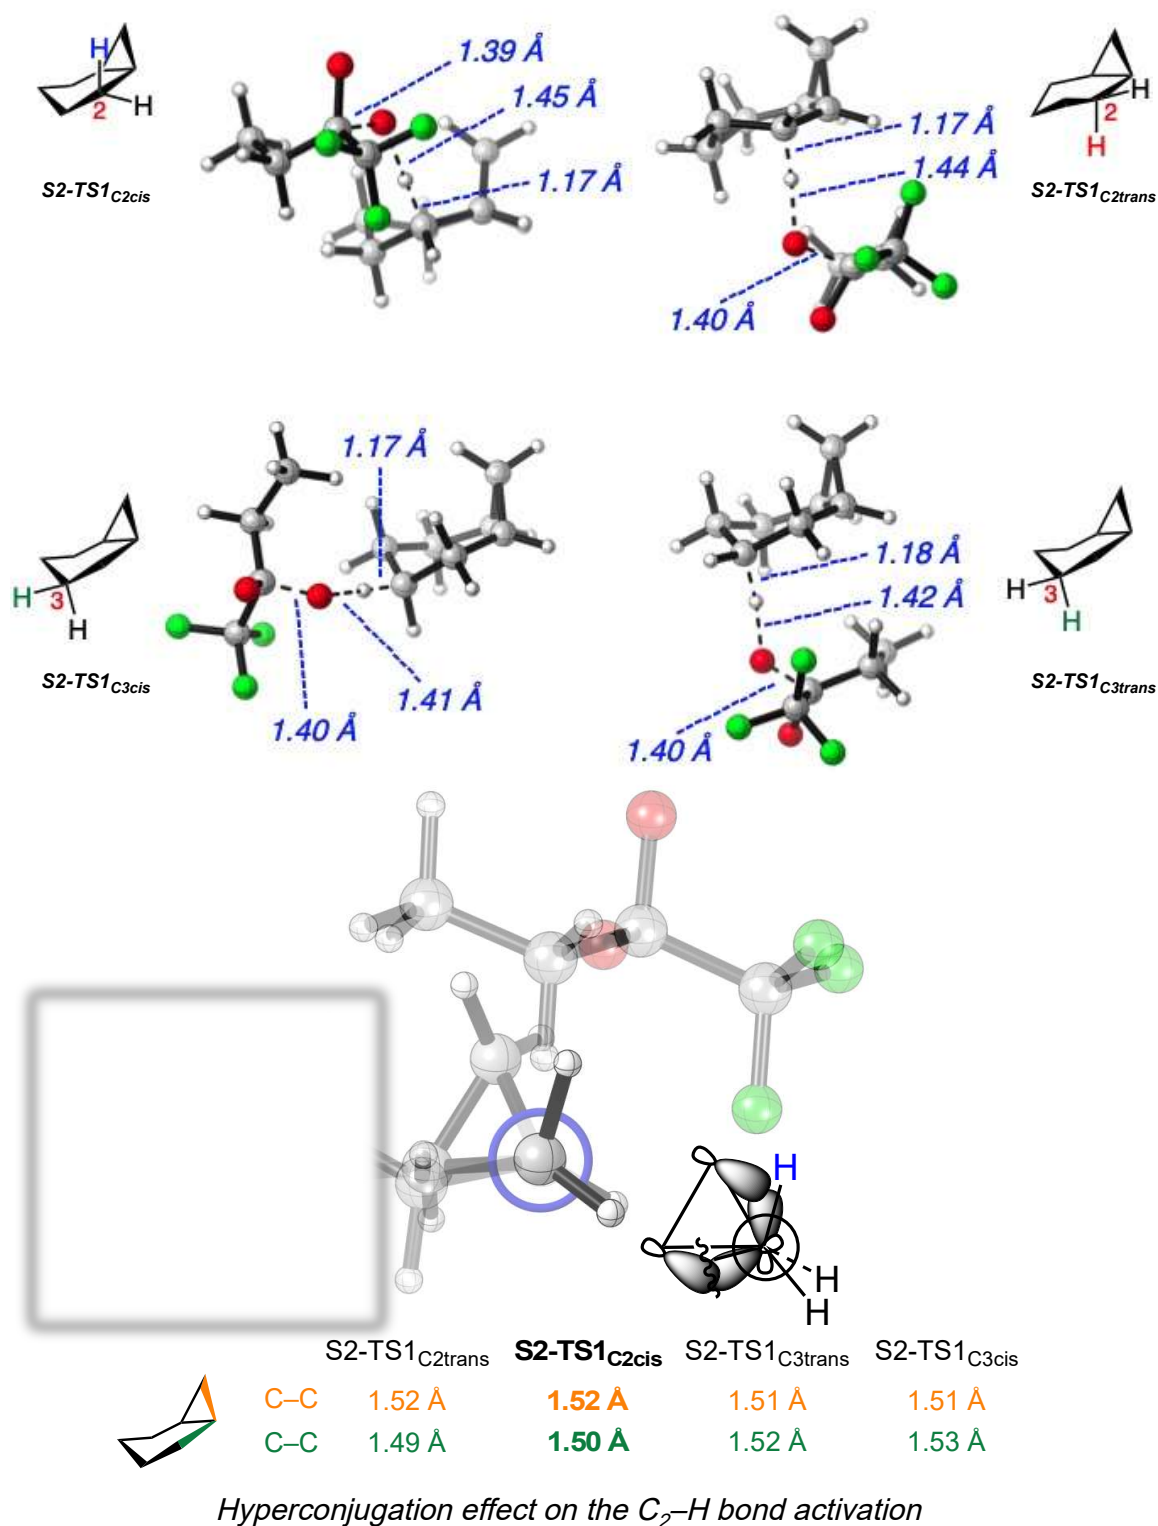

**Figure S8.** Transition state structures and structural analysis in C-H bond activation of bicyclo[4.1.0]heptane (S2).

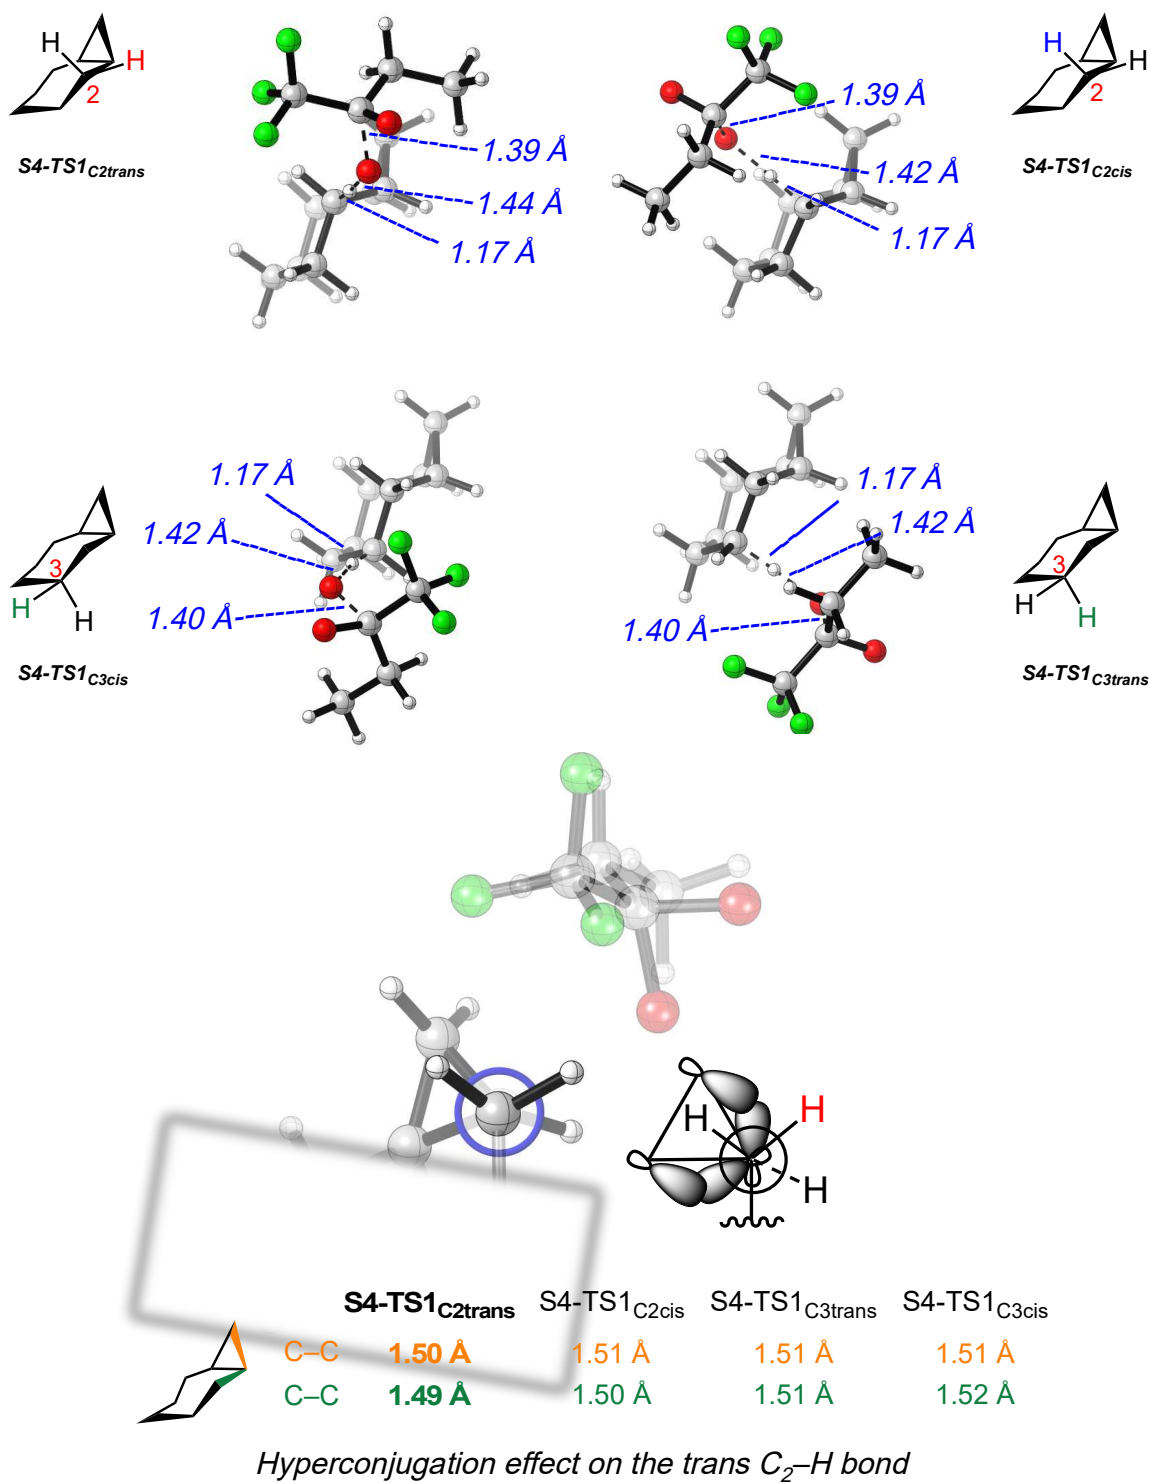

**Figure S9.** Transition state structures and structural analysis in C–H bond activation of bicyclo[5.1.0]octane (S4).

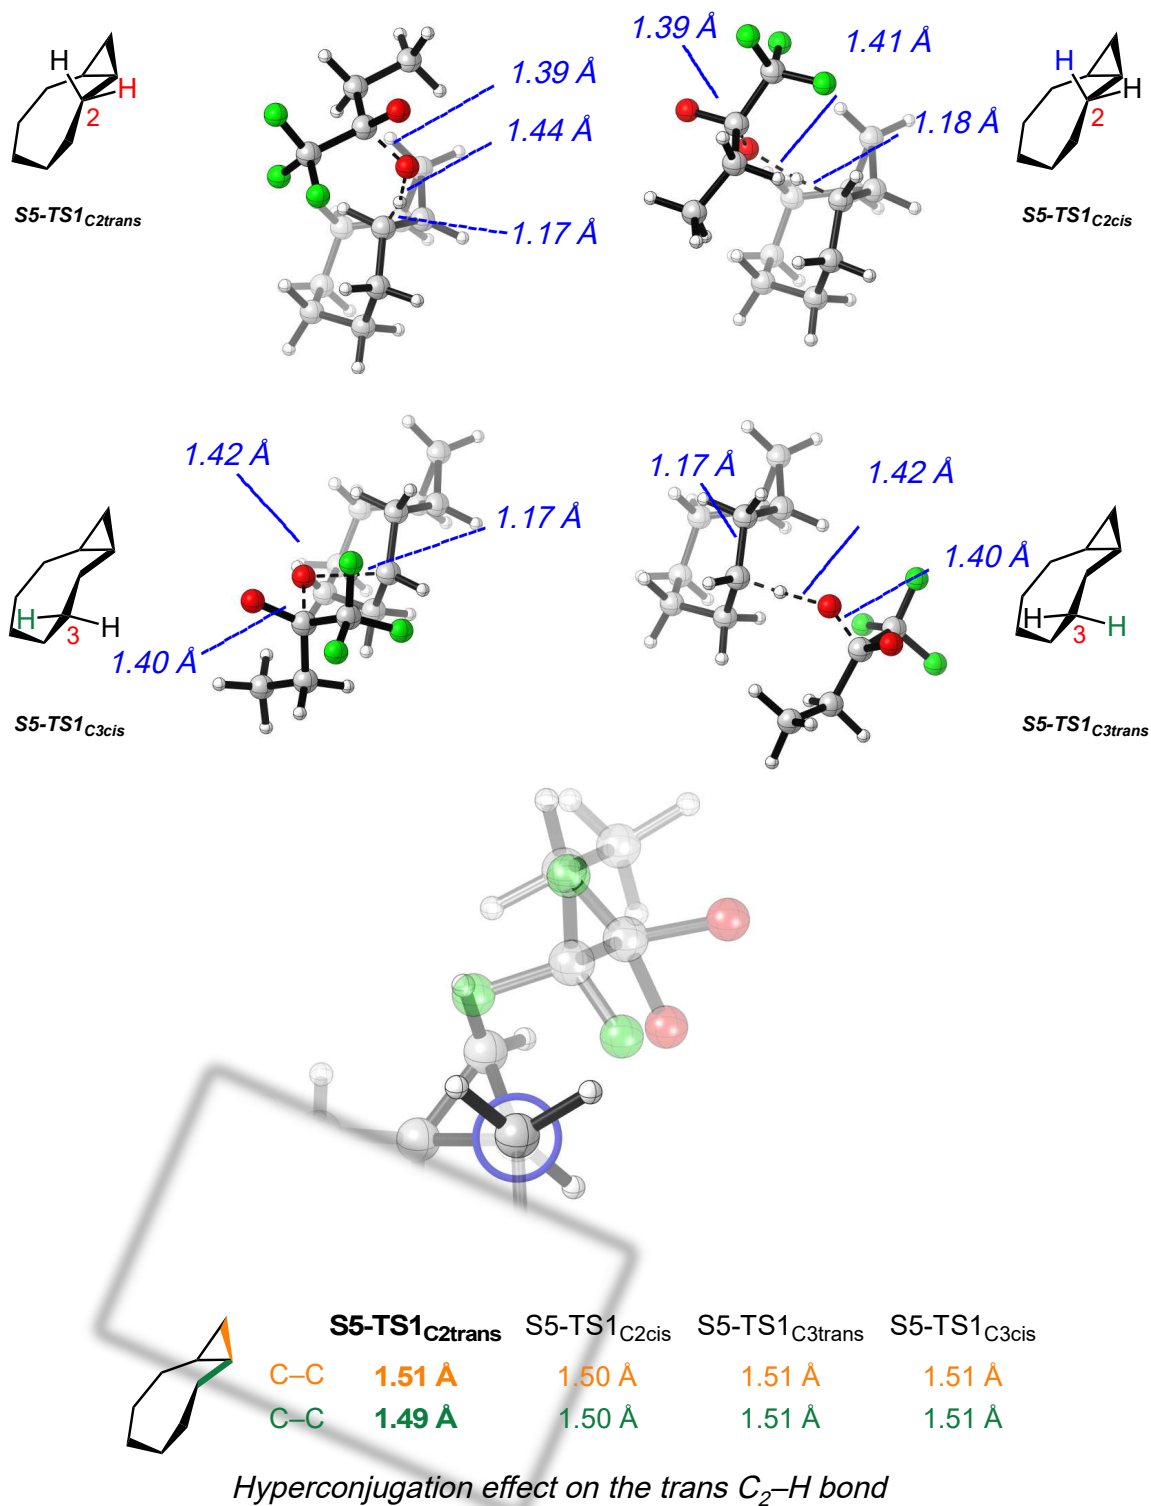

**Figure S10.** Transition state structures and structural analysis in C-H bond activation of bicyclo[6.1.0]nonane (S5).

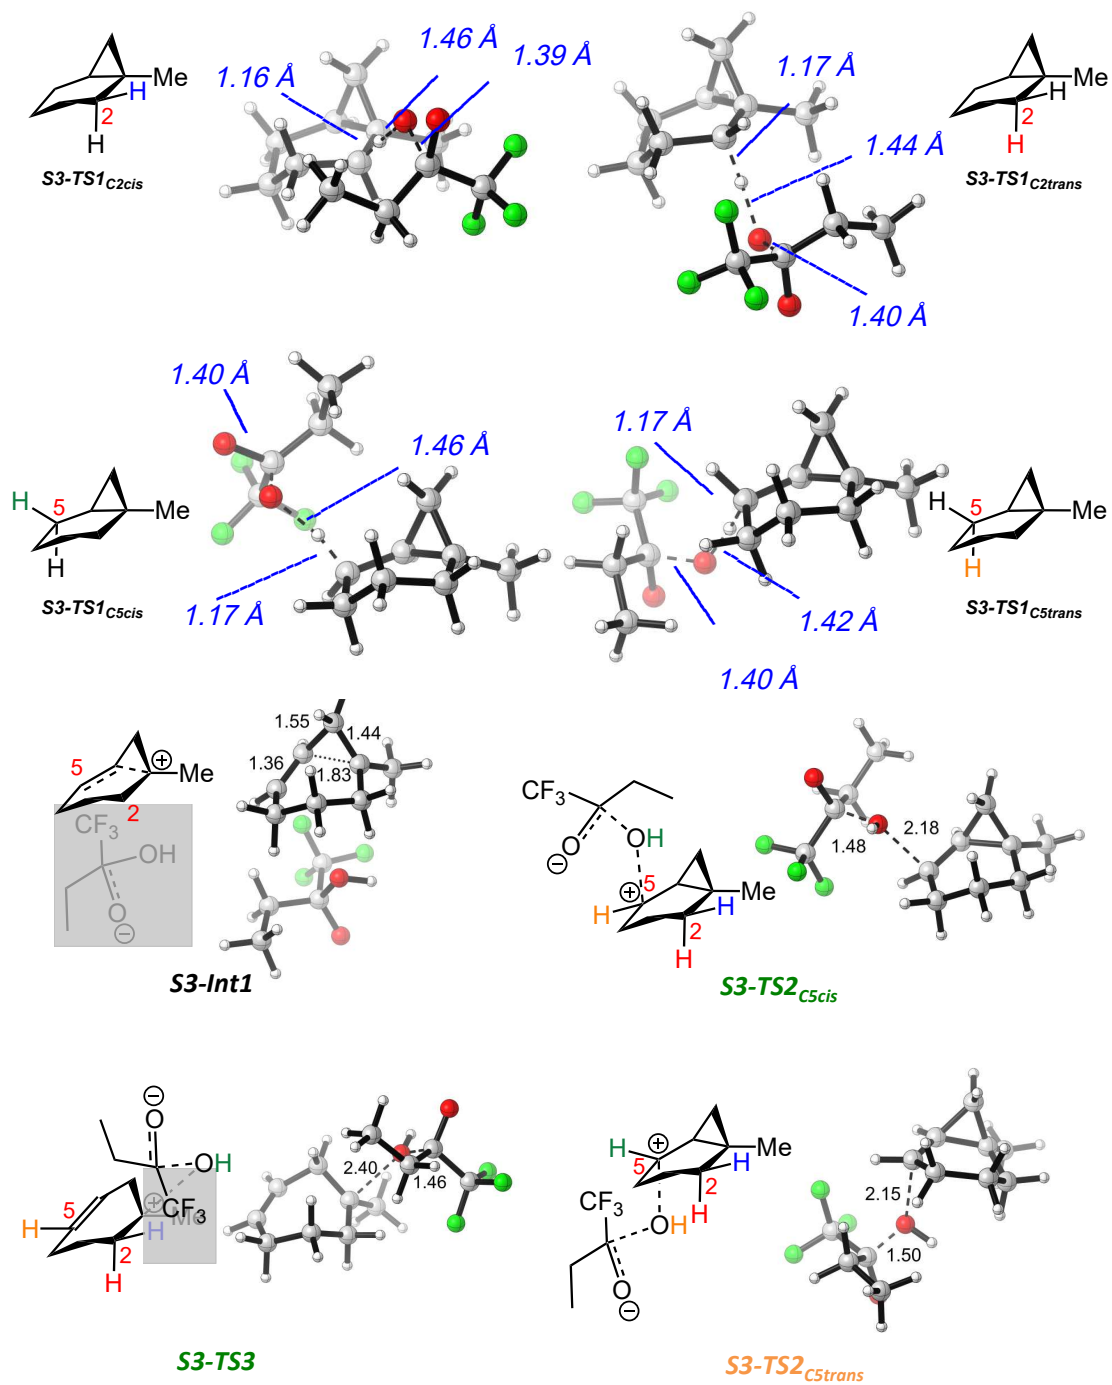

**Figure S11.** Transition state and intermediate structures in the oxygenation with 1-methylbicyclo[4.1.0]heptane (S3).

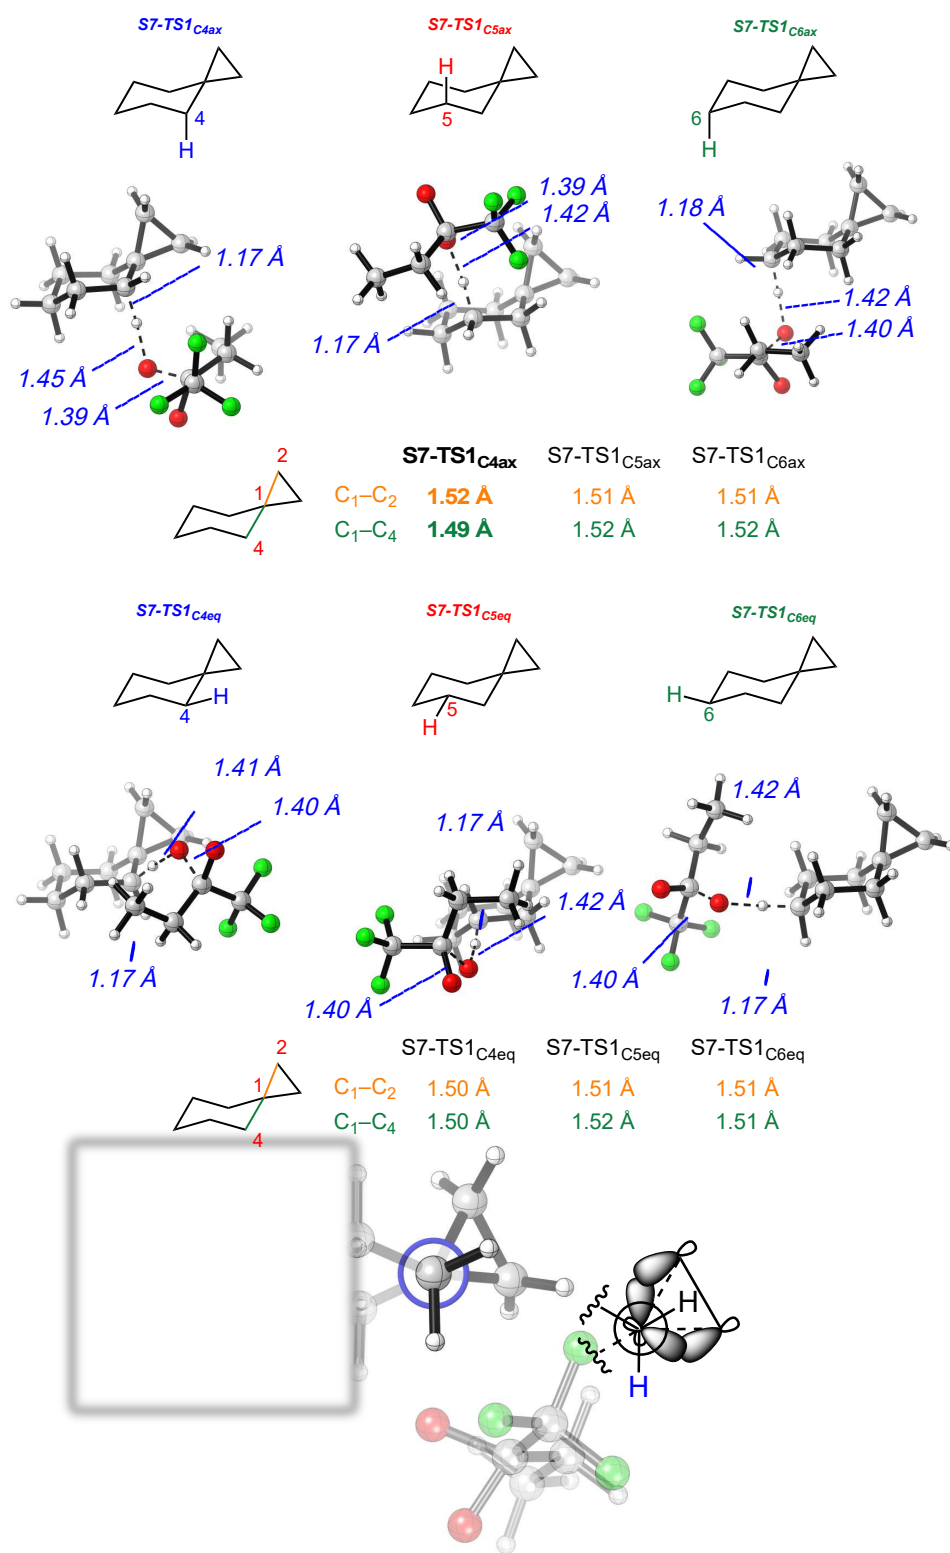

**Figure S12.** Transition state and intermediate structures in the oxygenation with spiro[2.5]octanes (S7).

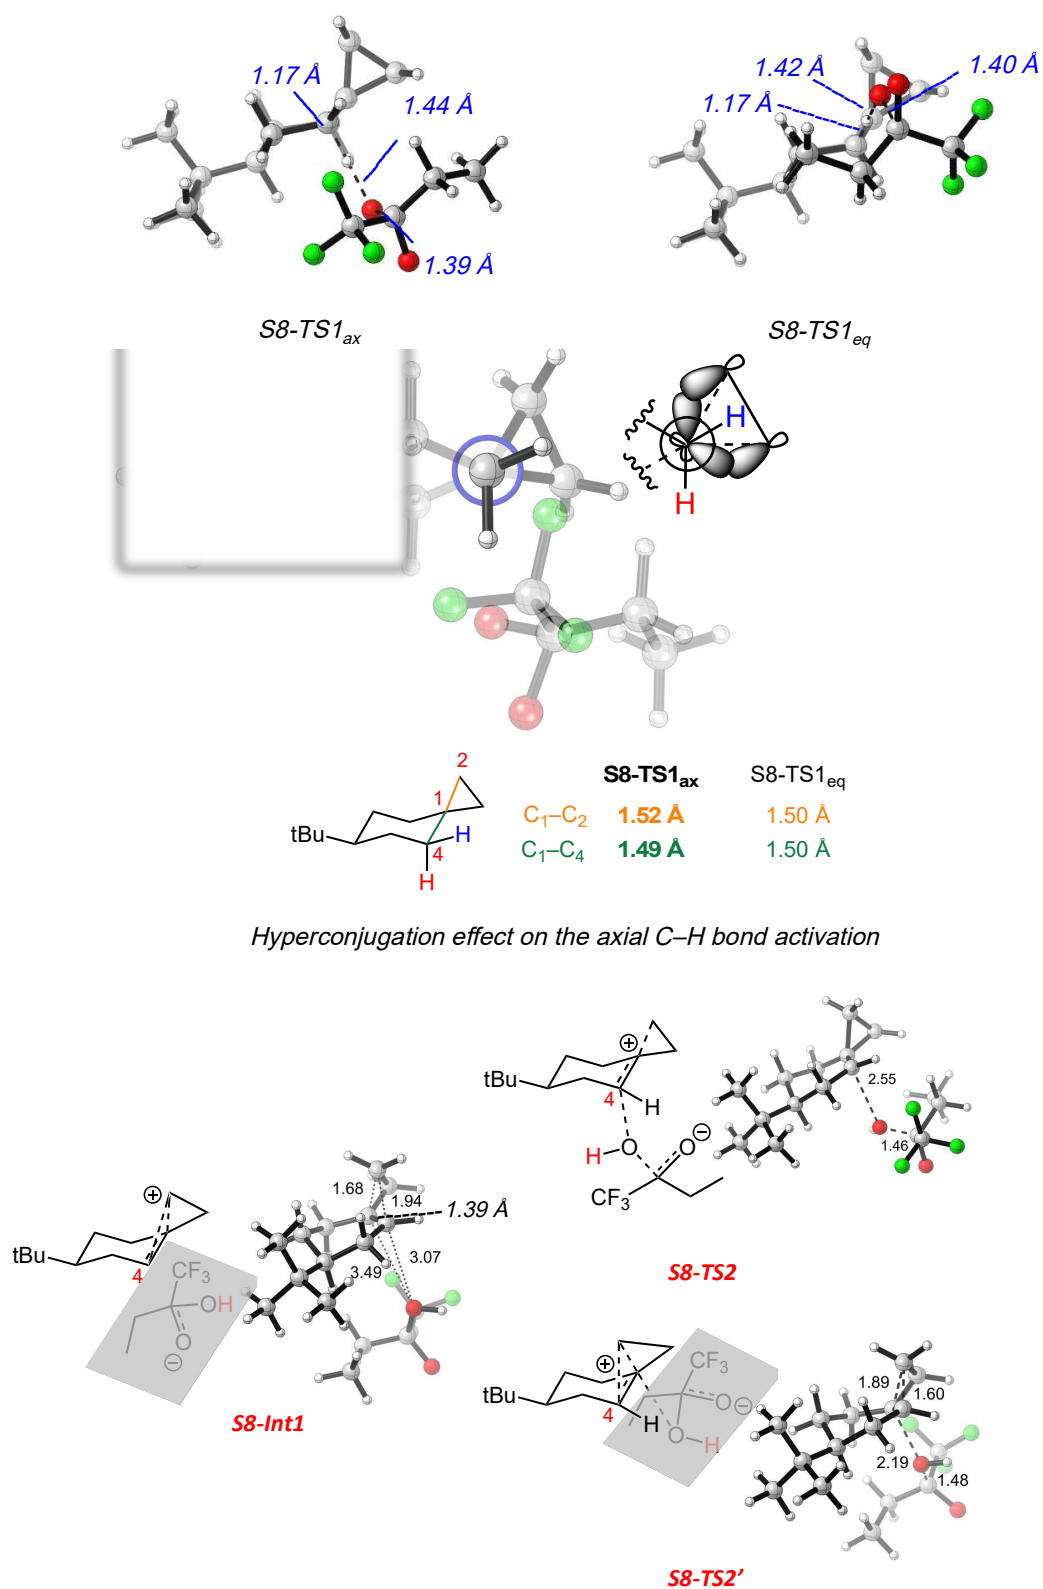

**Figure S13.** Transition state and intermediate structures in the oxygenation with 6-(tert-butyl)spiro[2.5]octanes (S8).



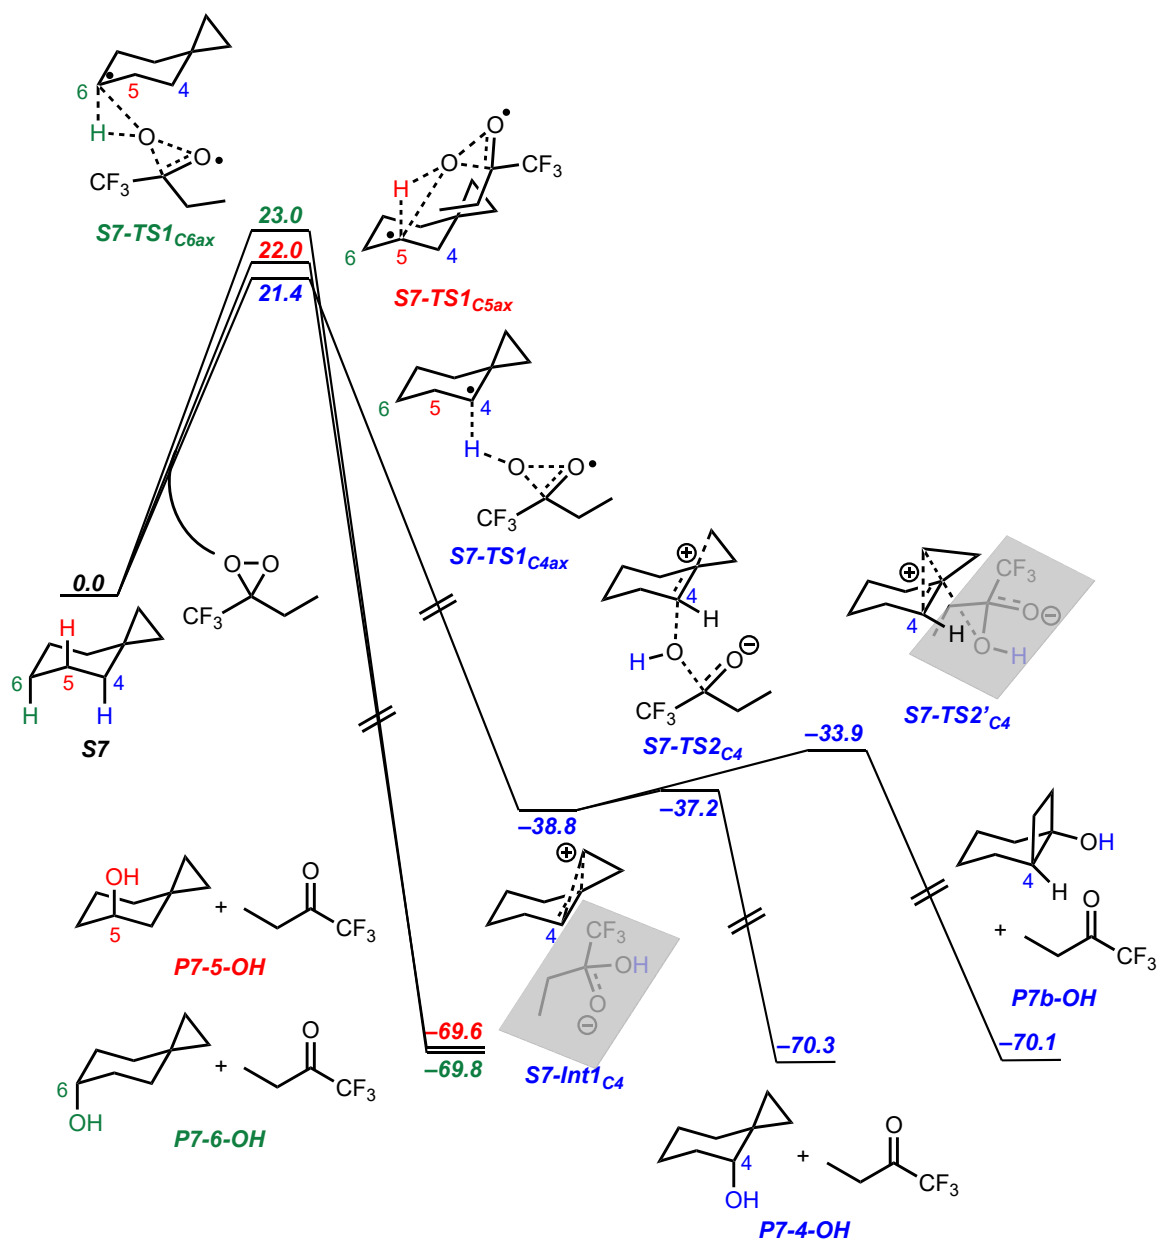

**Figure S14.** Energy profile in the oxygenation with spiro[2.5]octanes **S7**.

(u)M062X/6-31+g(d,p), CPCM(acetonitrile)

+1.33 V vs. SCE (acetonitrile)

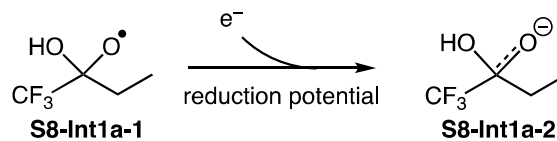

-0.13 V vs. SCE (acetonitrile)

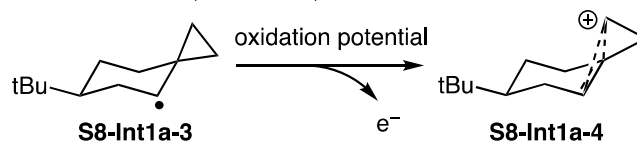

**Figure S15.** In silico redox potentials of 1,1,1-trifluoro-2-hydroxybutoxy radical **S8-Int1a-1** and 6-(*tert*-butyl)spiro[2.5]octan-4-yl radical **S8-Int1a-3**.

Nicewicz et al. reported a computational method for determining in silico redox potentials.<sup>28</sup> Following their procedures, we calculated the redox potential in the formation of 1,1,1-trifluoro-2-hydroxybutan-2-olate and 6-(*tert*-butyl)spiro[2.5]octan-4-ylum from the hypothetical radical pair S8-Int1a. We found that reduction potential of 1,1,1-trifluoro-2-hydroxybutoxy radical is +1.33 V vs. SCE (acetonitrile), and oxidation potential from 6-(*tert*-butyl)spiro[2.5]octan-4-yl radical intermediate to 6-(*tert*-butyl)spiro[2.5]octan-4-ylum cation is -0.13 V vs. SCE (acetonitrile). The in silico redox potentials suggest formation of the charged species via an exergonic redox process.

## S6. References

---

1. Galeotti, M.; Vicens, L.; Salamone, M.; Costas, M.; Bietti, M. *J. Am. Chem. Soc.* **2022**, *144*, 7391-7401
2. Jackson, J. E.; Misalitz, U.; Jones, M.; De Meijere, A. *Tetrahedron.* **1987**, *43*, 653-662.
3. Friedrich, E. C.; Lunetta, S. E.; Lewis, E. J. *J. Org. Chem.* **1989**, *54*, 2388-2390.
4. O'Connor, E. J.; Brandt, S. Helquist, P. *J. Am. Chem. Soc.* **1987**, *109*, 3739-3747.
5. Tchawou, A. A. S. W.; Raducan, M.; Chen, P. *Organometallics* **2017**, *36*, 180-191.
6. Martin, T.; Galeotti, M.; Salamone, M.; Liu, F.; Yu, Y.; Duan, M.; Houk, K. N.; Bietti, M. *J. Org. Chem.* **2021**, *86*, 9925-9937.
7. Shuler, W. G.; Johnson, S. L.; Hilinski, M. K. *Org. Lett.* **2017**, *19*, 4790-4793.
8. Uyanik, M.; Akakura, M.; Ishihara, K. *J. Am. Chem. Soc.* **2009**, *131*, 251-262.
9. Alorati, A. D.; Bio, M. M.; Brands, K. M. L.; Cleator, E.; Davies, A. J.; Wilson, R. D.; Wise, C. S. *Org. Process Res. Dev.* **2007**, *11*, 637-641.
10. Friedrich, E. C.; Biresaw, G. *J. Org. Chem.* **1982**, *47*, 1615-1618.
11. De Costa, B. R.; George, C.; Burke, T. R.; Rafferty, M. F.; Contreras, P. C.; Mick, S. J.; Jacobson, A. E.; Rice, K. C. *J. Med. Chem.* **1988**, *31*, 1571-1575.
12. Denmark, S. E.; Edwards, J. P. *J. Org. Chem.* **1991**, *56*, 6974-6981.
13. Rodriguez-Garcia, C.; Ibarzo, J.; Alvarez-Larena, A.; Branchadell, V.; Oliva, A.; Ortuno, R. M. *Tetrahedron* **2001**, *57*, 1025-1034.
14. Newcomb, M.; Shen, R.; Lu, Y.; Coon, M. J.; Hollenberg, P. F.; Kopp, D. A.; Lippard, S. J. *J. Am. Chem. Soc.* **2002**, *124*, 6879-6886.
15. Newcomb, M.; Dharmika, R. E. P.; Lansakara, D. S. P.; Kim, H.-Y.; Lippard, S. J.; Beauvais, L. G.; Murray, L. J.; Izzo, V.; Holleberg, P. F.; Coon, M. J. *J. Org. Chem.* **2007**, *72*, 1121-1127.
16. Kirschberg, T.; Mattay, J. *J. Org. Chem.* **1996**, *61*, 8885-8896.
17. Mash, E. A.; Nelson, K. A. *Tetrahedron* **1987**, *43*, 679-692.
18. Gassman, P. G.; Atkins, T. J. *J. Am. Chem. Soc.* **1972**, *94*, 7741-7748.
19. Li, P.-F.; Yi, C.-B.; Qu, J. *Org. Biomol. Chem.* **2015**, *13*, 5012.
20. Mash, E. A.; Gregg, T. M.; Kaczynski, M. A. *J. Org. Chem.* **1996**, *61*, 2743-2752.
21. (a) Cope, A. C.; Moon, S.; Park, C. H. *J. Am. Chem. Soc.* **1964**, *84*, 4843-4849. (b) Hanold, N.; Meier, H. *Chem. Ber.* **1985**, *118*, 198-209.
22. Poulter, C. D.; Friedrich, E. C.; Winstein, S. *J. Am. Chem. Soc.* **1970**, *92*, 4274-4281.
23. Herbert, M.; Antony-Meyer, C.; Schulz-Popitz, C.; Zerban, G. *Liebigs Ann. Chem.* **1987**, 1087-1094.
24. Chen, M. S.; White, M. C. *Science* **2010**, *327*, 783-787.

- 
25. (a) Hanack, v. M.; Schneider, H.-J.; *Liebigs Ann. Chem.* **1965**, 686, 8-18. (b) Wiberg, K. B.; Hiatt, J. E.; Hsieh, K. *J. Am. Chem. Soc.* **1970**, 92, 544-553.
26. Lillie, T. S.; Ronald, R. C. *J. Org. Chem.* **1985**, 50, 5084-5088.
27. Liu, F.; Ma, S.; Lu, Z.; Nangia, A.; Duan, M.; Yu, Y.; Xu, G.; Mei, Y.; Bietti, M.; Houk, K. N. *J. Am. Chem. Soc.* **2022**, 144, 6802–6812.
28. Roth, H. G.; Romero, N. A.; Nicewicz, D. A. *Synlett* **2016**, 27, 714–723.
